# Supplementary material for: A pan-variant mRNA-LNP T cell vaccine protects HLA transgenic mice from mortality after infection with SARS-CoV-2 Beta
Source: PubMed Central journal article supplement (PMC10033589; doi:10.3389/fimmu.2023.1135815), 2023-03-09
Supplement: DataSheet_2.pdf [file DataSheet_2.pdf]

Supplementary Figure 7  
Page 1/29

MIT-T-COVID Lung 1-1  
2 dpi

CD8<sup>+</sup>/CD4<sup>+</sup> Cell Annotations

Nucleated Cell Annotations

CD8<sup>+</sup>

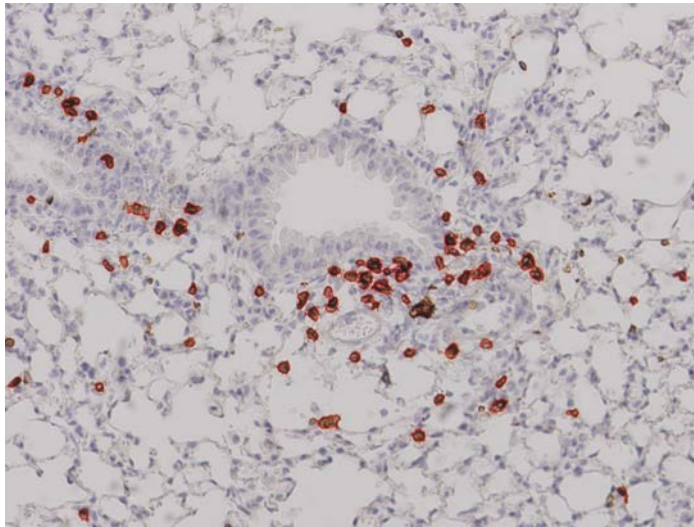

75 CD8<sup>+</sup> cells

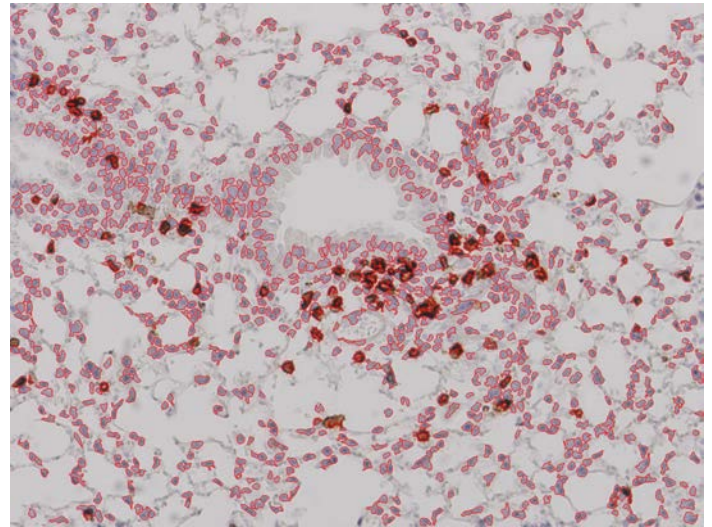

1170 nucleated cells

CD4<sup>+</sup>

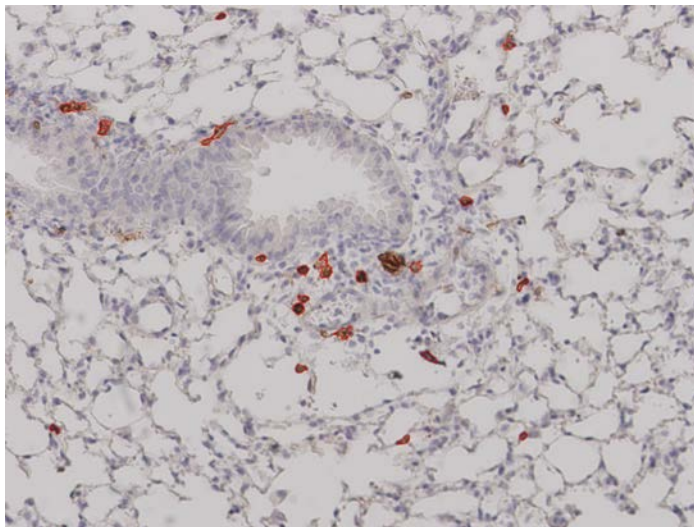

26 CD4<sup>+</sup> cells

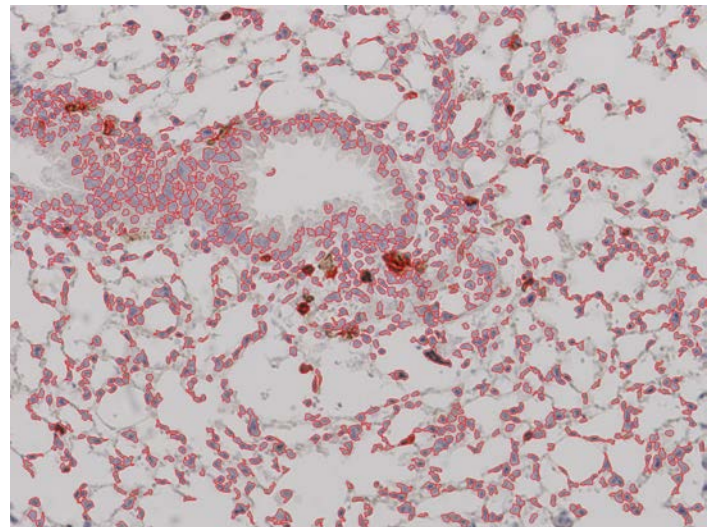

1194 nucleated cells

Supplementary Figure 7  
Page 2/29

MIT-T-COVID Lung 1-2  
2 dpi

CD8<sup>+</sup>/CD4<sup>+</sup> Cell Annotations

Nucleated Cell Annotations

CD8<sup>+</sup>

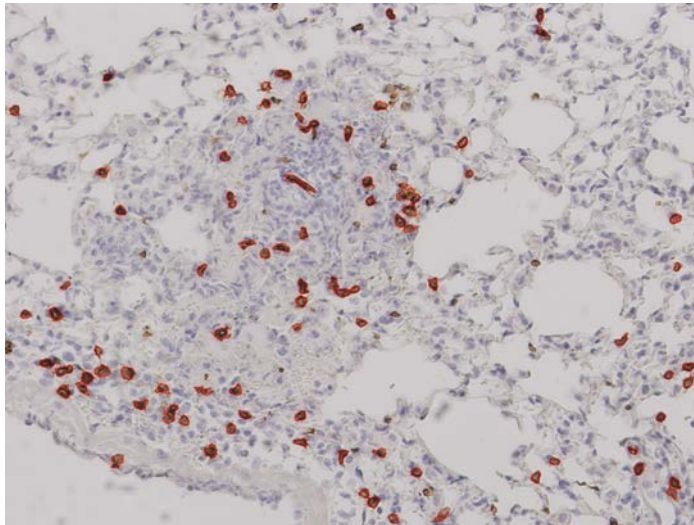

89 CD8<sup>+</sup> cells

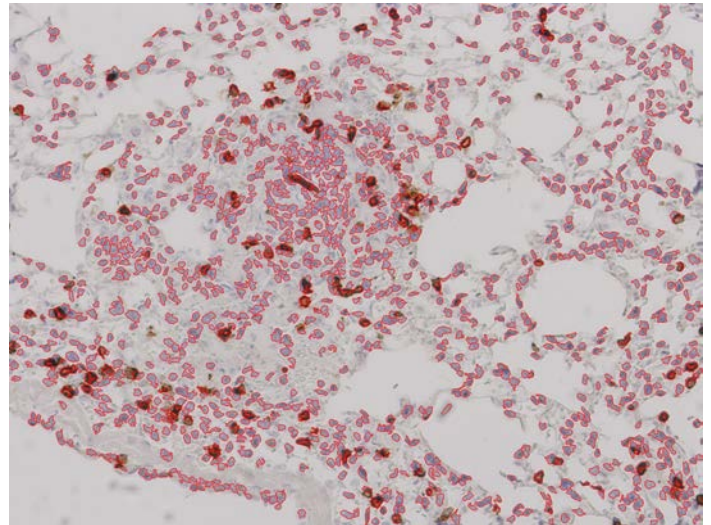

1220 nucleated cells

CD4<sup>+</sup>

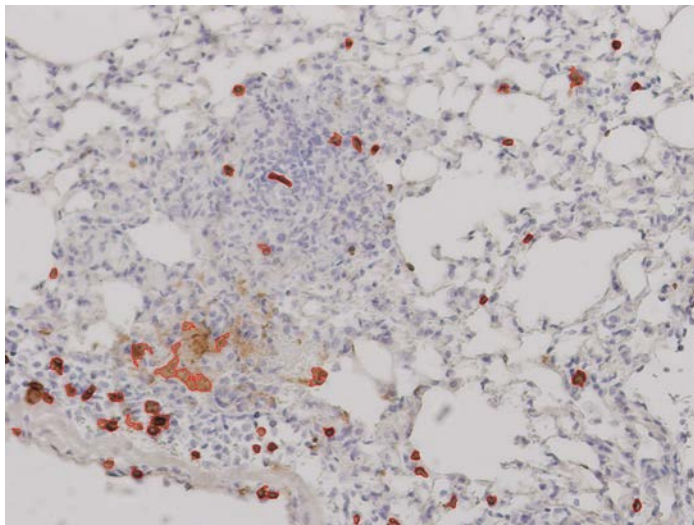

56 CD4<sup>+</sup> cells

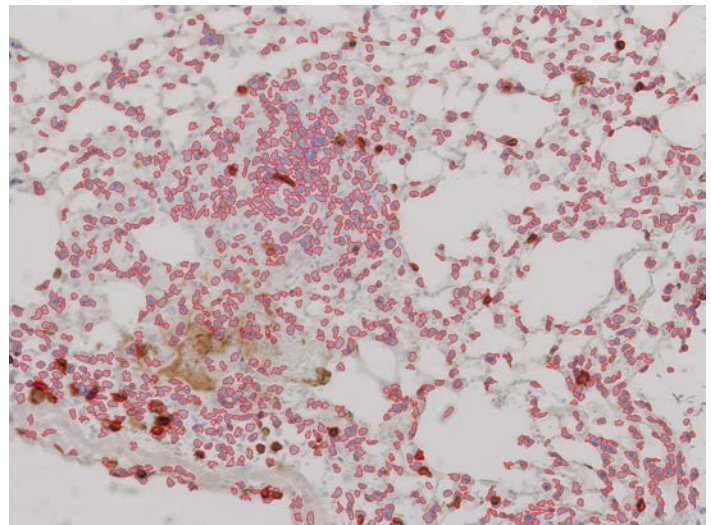

1248 nucleated cells

Supplementary Figure 7  
Page 3/29

MIT-T-COVID Lung 1-3  
2 dpi

CD8<sup>+</sup>/CD4<sup>+</sup> Cell Annotations

Nucleated Cell Annotations

CD8<sup>+</sup>

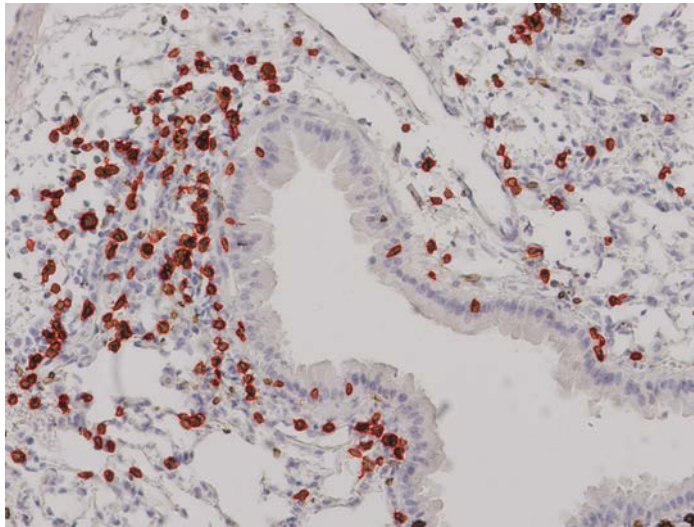

188 CD8<sup>+</sup> cells

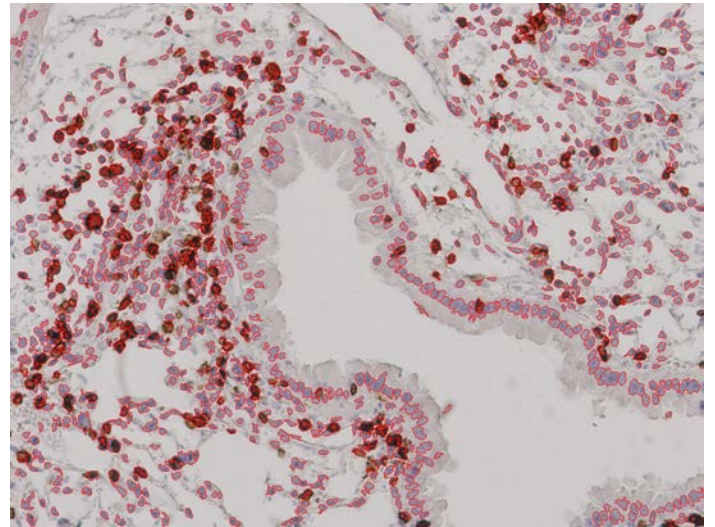

1156 nucleated cells

CD4<sup>+</sup>

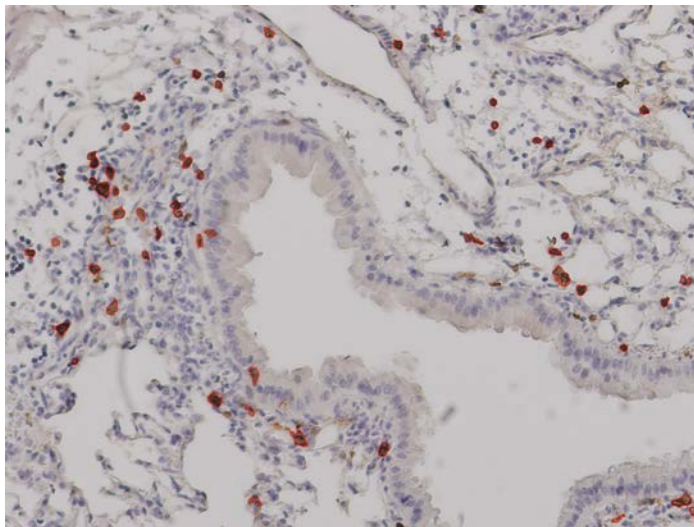

51 CD4<sup>+</sup> cells

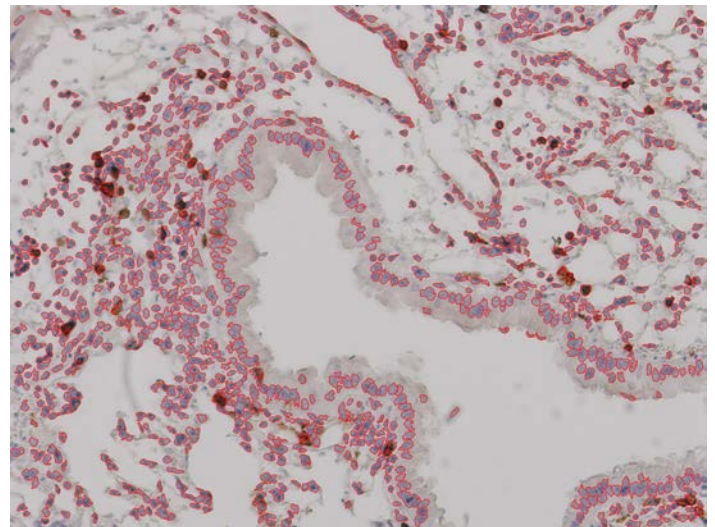

1121 nucleated cells

Supplementary Figure 7  
Page 4/29

MIT-T-COVID Lung 2-1  
2 dpi

CD8<sup>+</sup>/CD4<sup>+</sup> Cell Annotations

Nucleated Cell Annotations

CD8<sup>+</sup>

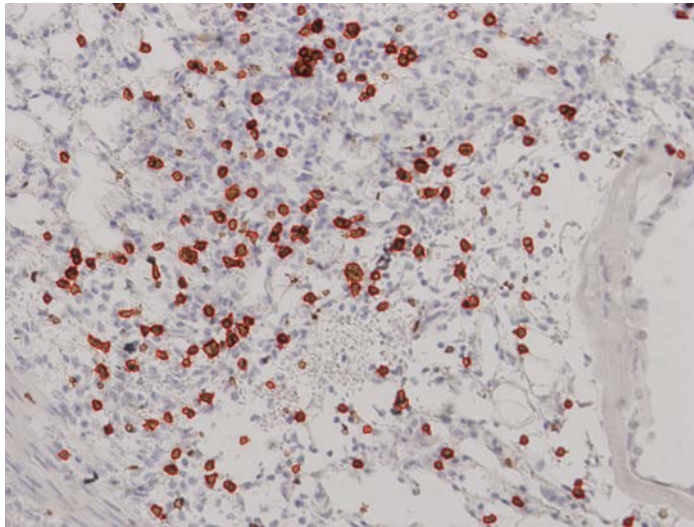

158 CD8<sup>+</sup> cells

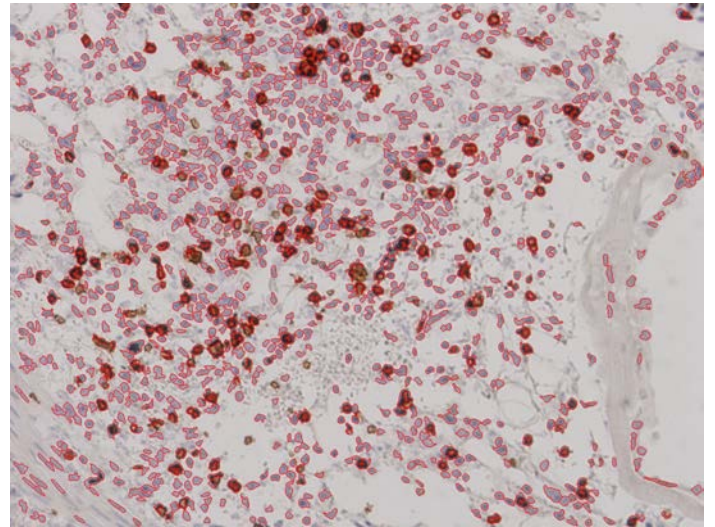

1268 nucleated cells

CD4<sup>+</sup>

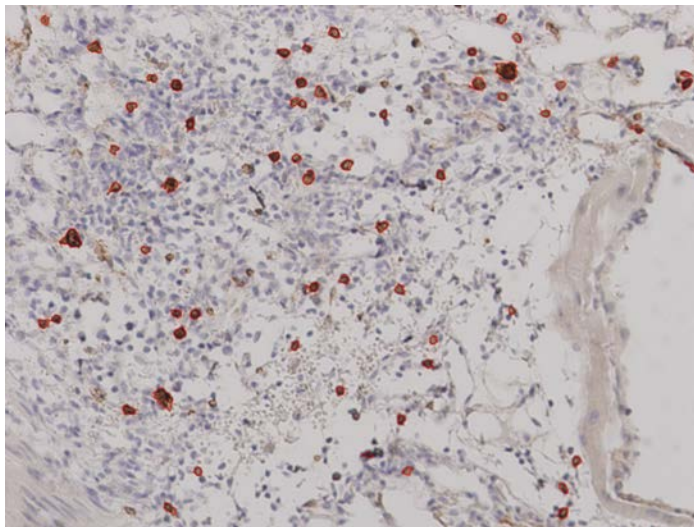

61 CD4<sup>+</sup> cells

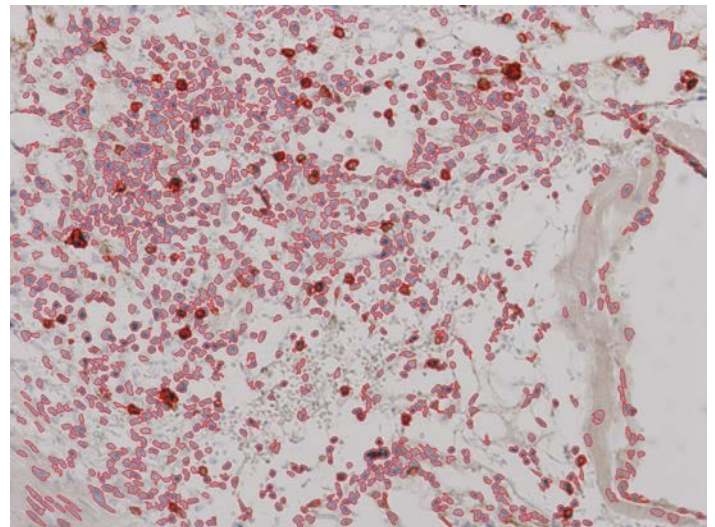

1309 nucleated cells

Supplementary Figure 7  
Page 5/29

MIT-T-COVID Lung 3-1  
2 dpi

CD8<sup>+</sup>/CD4<sup>+</sup> Cell Annotations

Nucleated Cell Annotations

CD8<sup>+</sup>

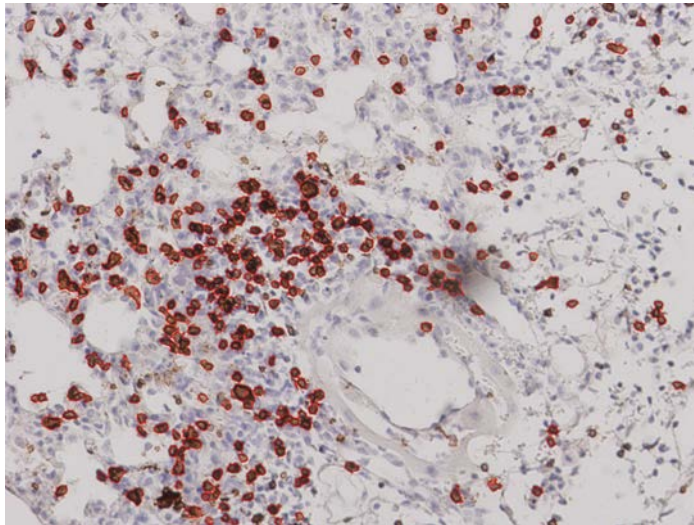

267 CD8<sup>+</sup> cells

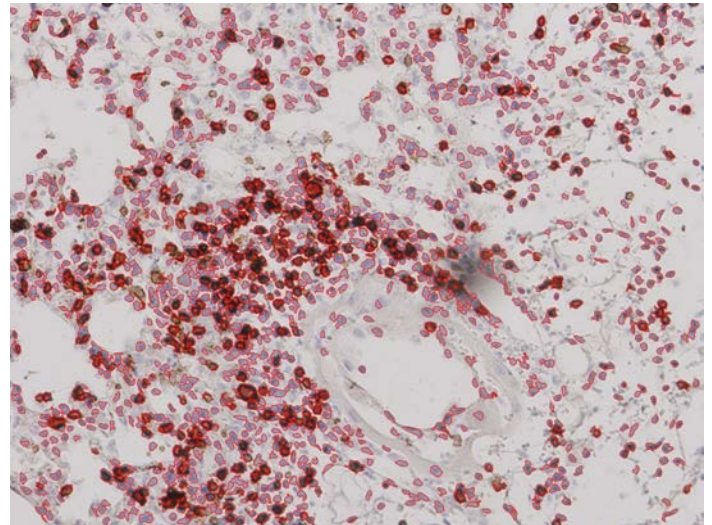

1313 nucleated cells

CD4<sup>+</sup>

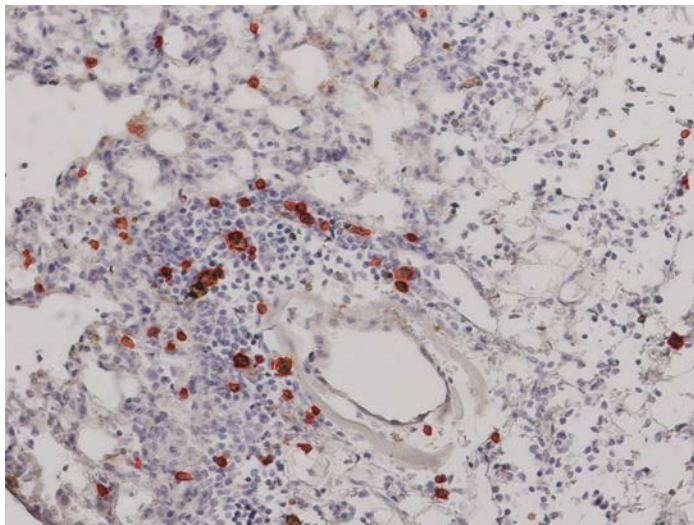

56 CD4<sup>+</sup> cells

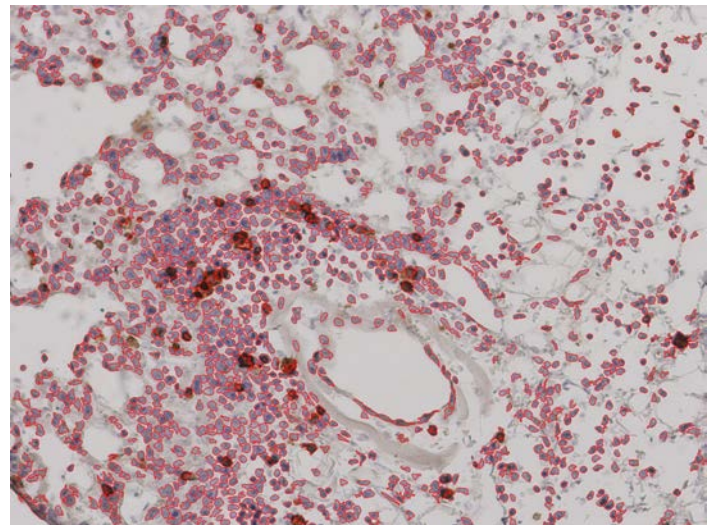

1455 nucleated cells

Supplementary Figure 7  
Page 6/29

Pfizer/BNT Lung 1-1  
2 dpi

CD8<sup>+</sup>/CD4<sup>+</sup> Cell Annotations

Nucleated Cell Annotations

CD8<sup>+</sup>

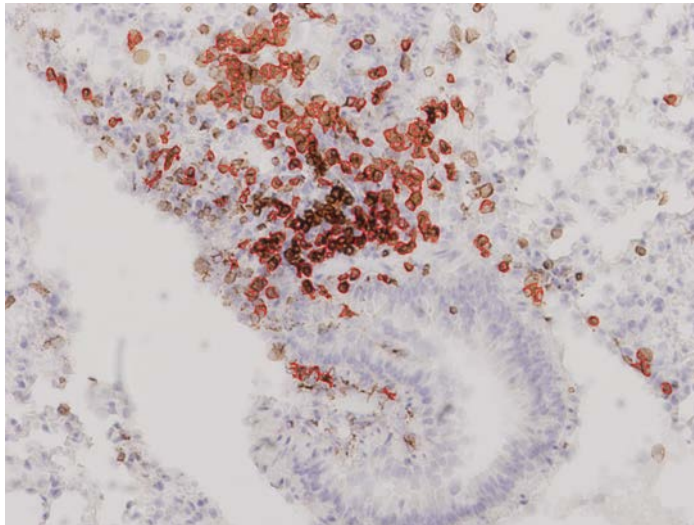

152 CD8<sup>+</sup> cells

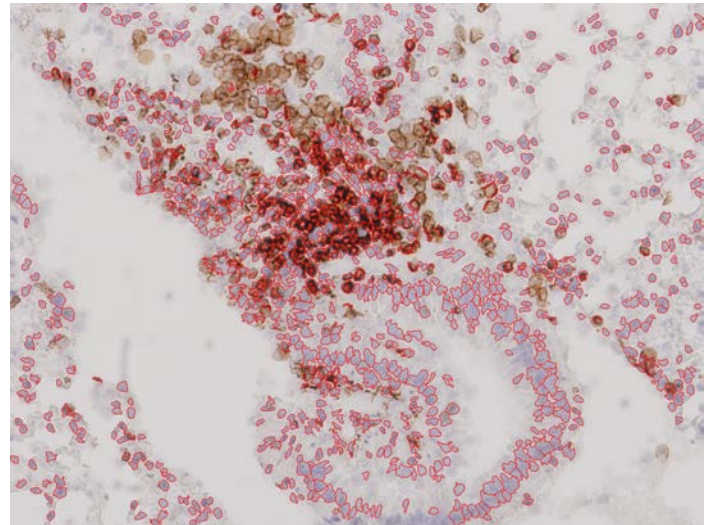

1032 nucleated cells

CD4<sup>+</sup>

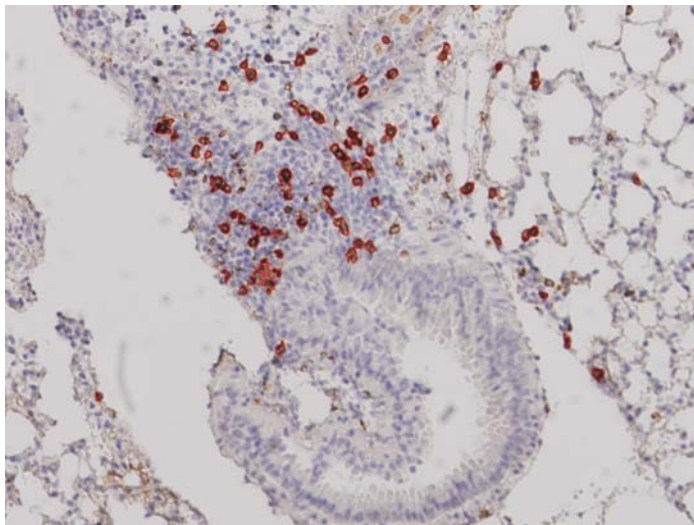

72 CD4<sup>+</sup> cells

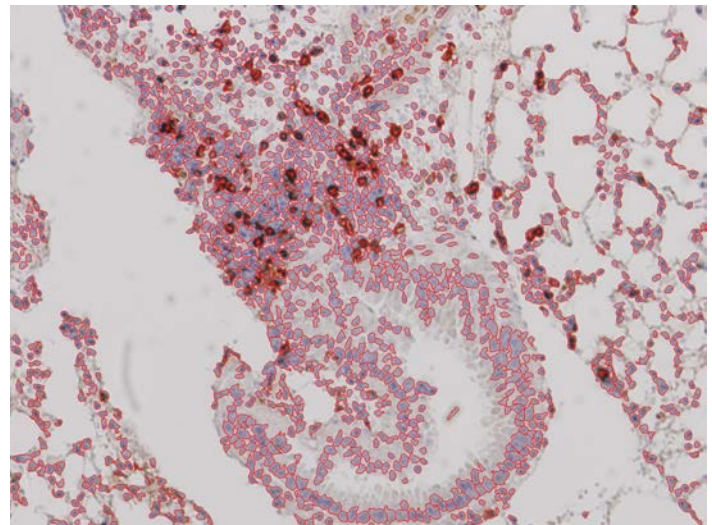

1386 nucleated cells

Supplementary Figure 7  
Page 7/29

Pfizer/BNT Lung 2-1  
2 dpi

CD8<sup>+</sup>/CD4<sup>+</sup> Cell Annotations

Nucleated Cell Annotations

CD8<sup>+</sup>

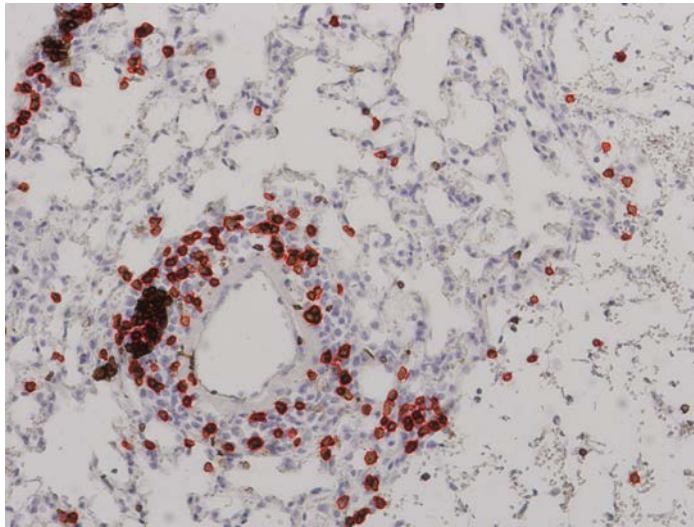

138 CD8<sup>+</sup> cells

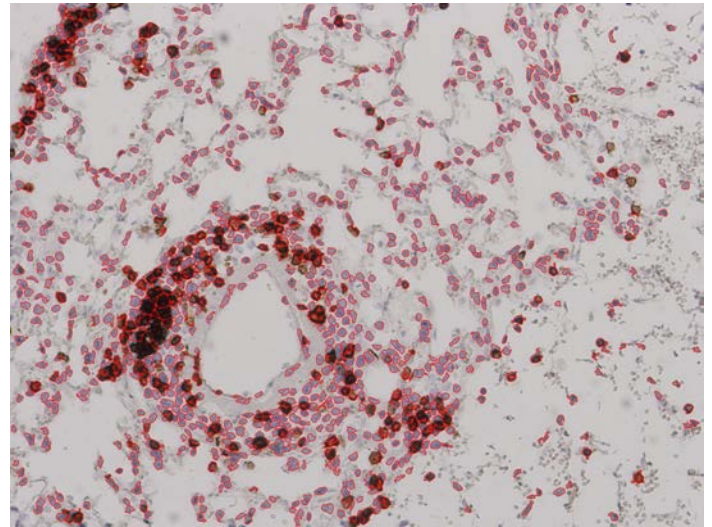

989 nucleated cells

CD4<sup>+</sup>

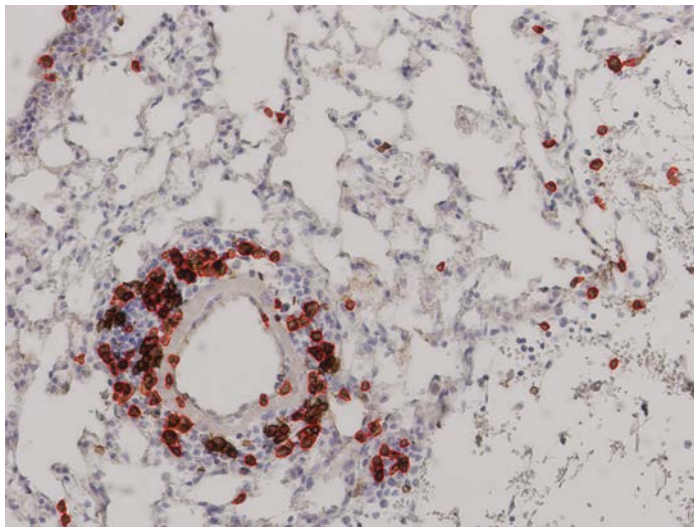

90 CD4<sup>+</sup> cells

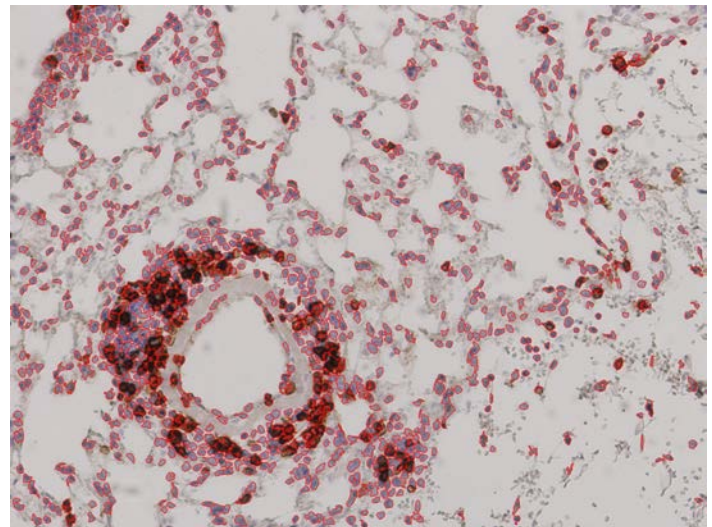

1009 nucleated cells

Supplementary Figure 7  
Page 8/29

Pfizer/BNT Lung 2-2  
2 dpi

CD8<sup>+</sup>/CD4<sup>+</sup> Cell Annotations

Nucleated Cell Annotations

CD8<sup>+</sup>

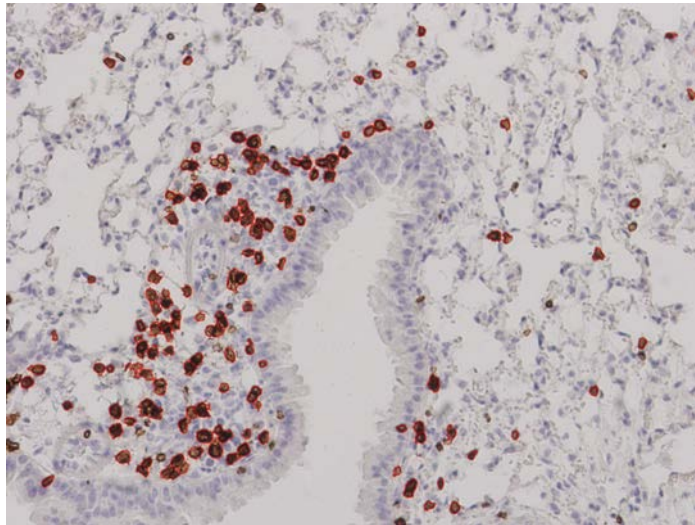

123 CD8<sup>+</sup> cells

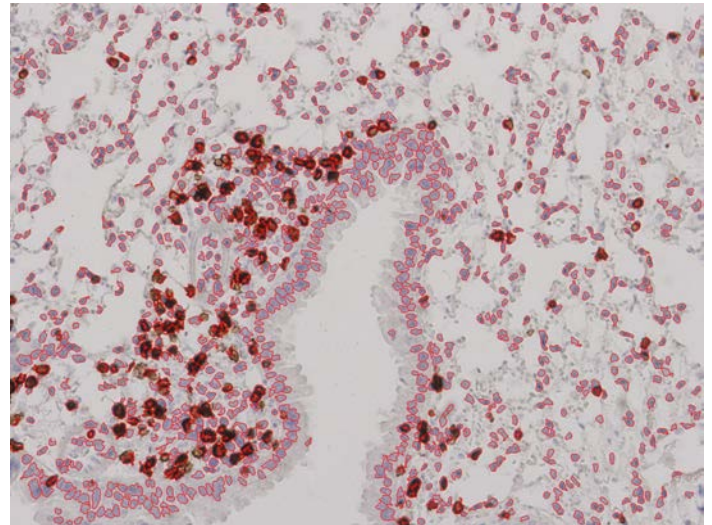

1072 nucleated cells

CD4<sup>+</sup>

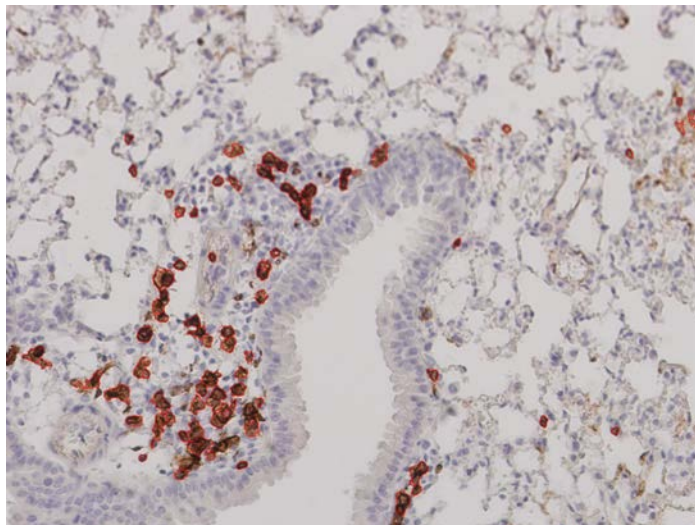

82 CD4<sup>+</sup> cells

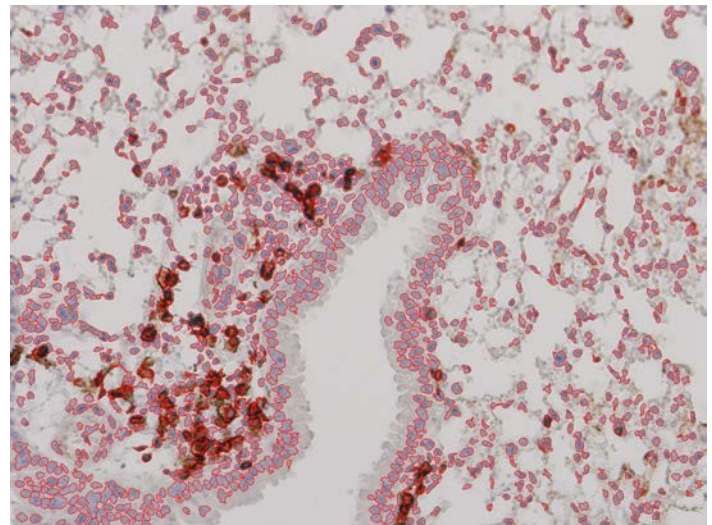

1178 nucleated cells



Supplementary Figure 7  
Page 9/29

Pfizer/BNT Lung 3-1  
2 dpi

CD8<sup>+</sup>/CD4<sup>+</sup> Cell Annotations

Nucleated Cell Annotations

CD8<sup>+</sup>

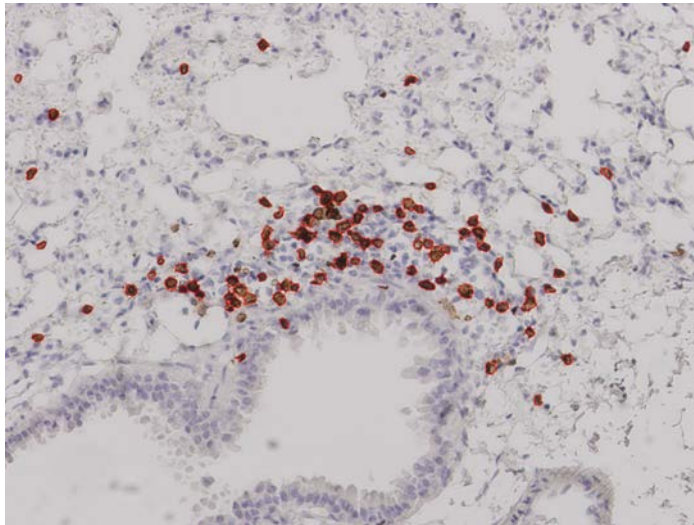

84 CD8<sup>+</sup> cells

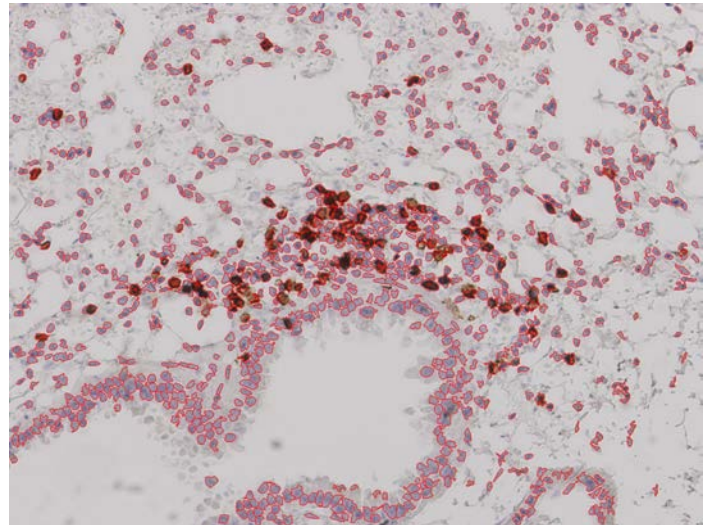

955 nucleated cells

CD4<sup>+</sup>

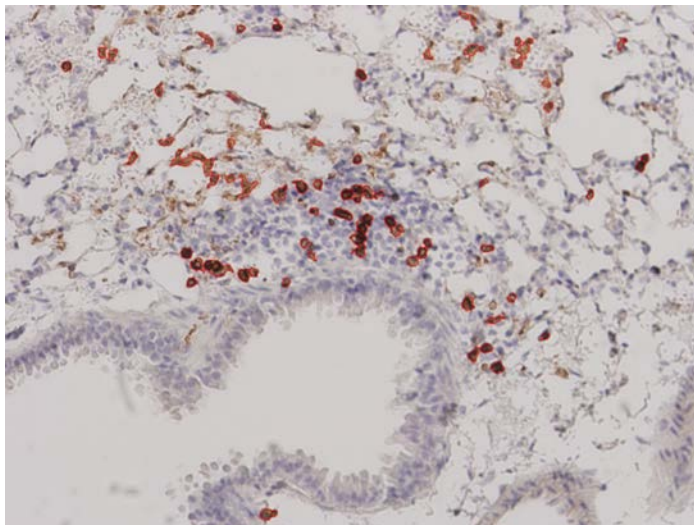

71 CD4<sup>+</sup> cells

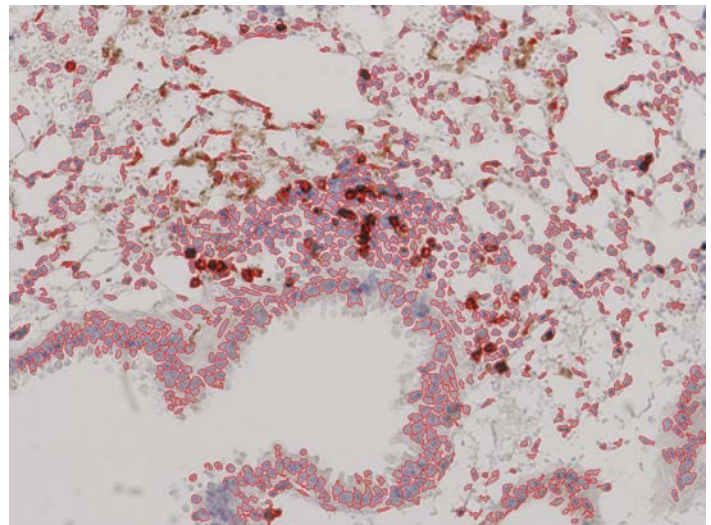

1043 nucleated cells

Supplementary Figure 7  
Page 10/29

Pfizer/BNT Lung 3-2  
2 dpi

CD8<sup>+</sup>/CD4<sup>+</sup> Cell Annotations

Nucleated Cell Annotations

CD8<sup>+</sup>

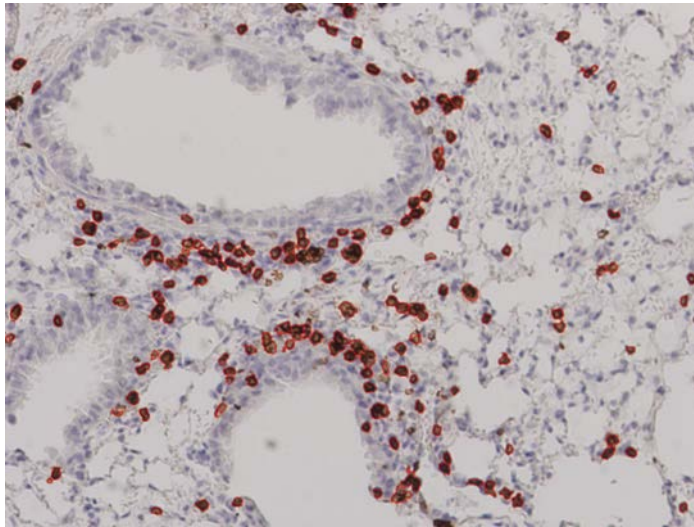

139 CD8<sup>+</sup> cells

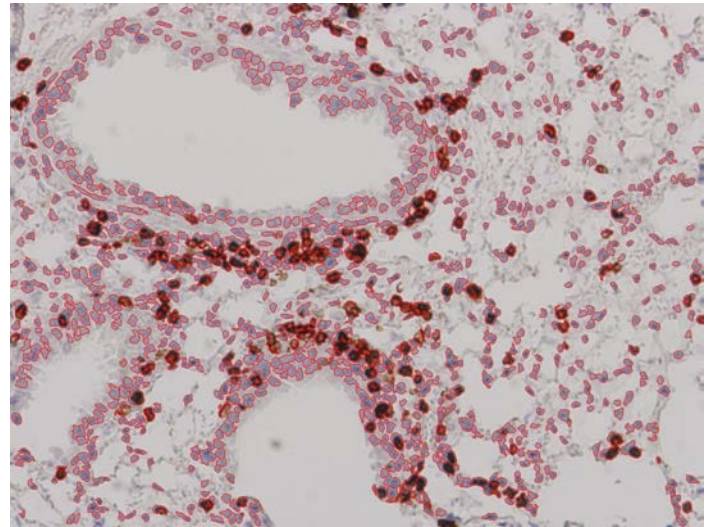

1064 nucleated cells

CD4<sup>+</sup>

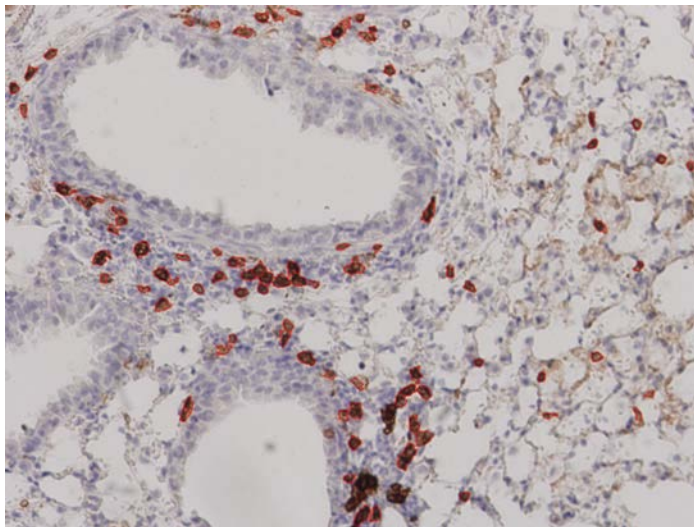

85 CD4<sup>+</sup> cells

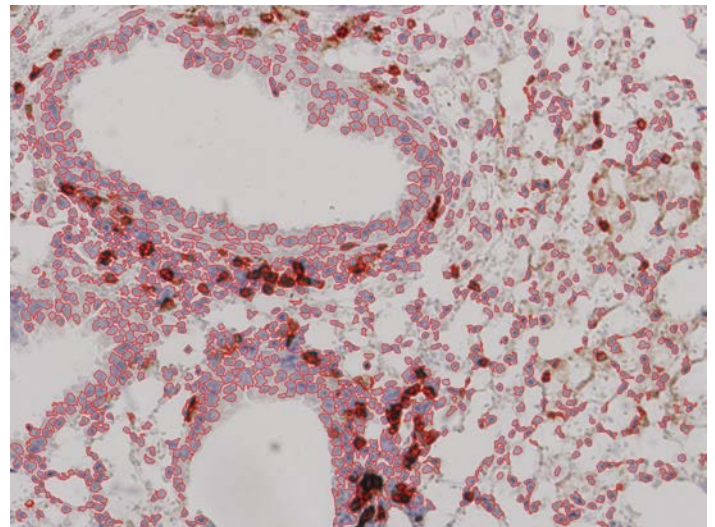

1165 nucleated cells

Supplementary Figure 7  
Page 11/29

PBS Lung 1-1  
2 dpi

CD8<sup>+</sup>/CD4<sup>+</sup> Cell Annotations

Nucleated Cell Annotations

CD8<sup>+</sup>

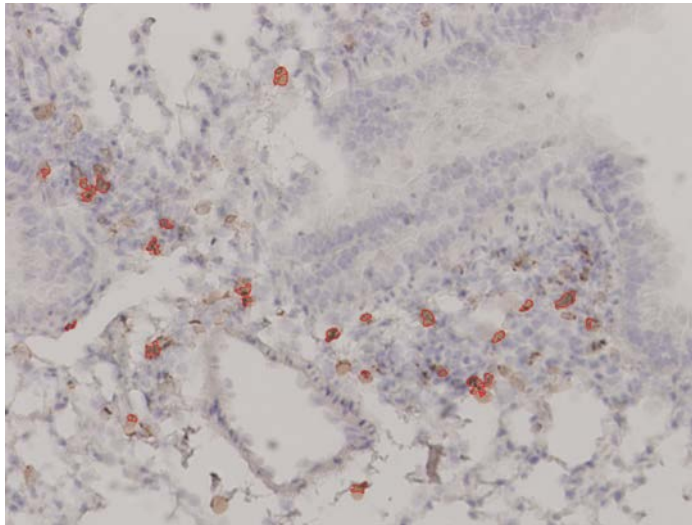

25 CD8<sup>+</sup> cells

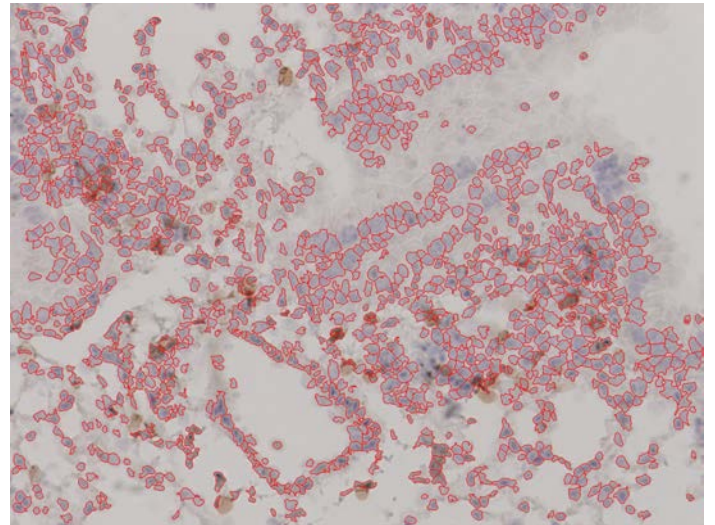

1165 nucleated cells

CD4<sup>+</sup>

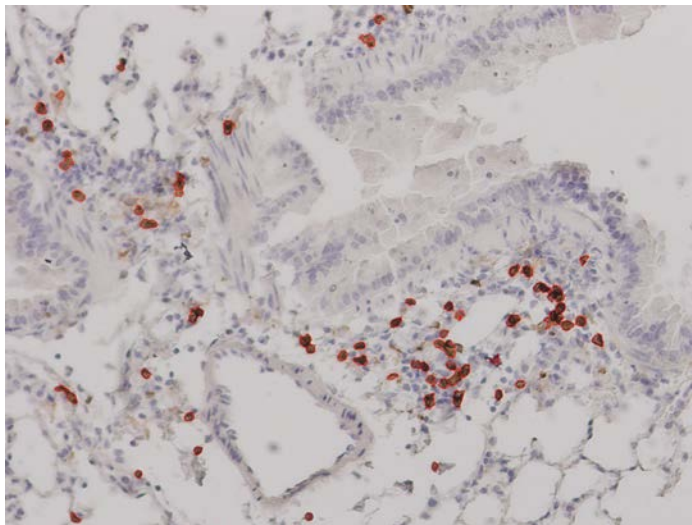

63 CD4<sup>+</sup> cells

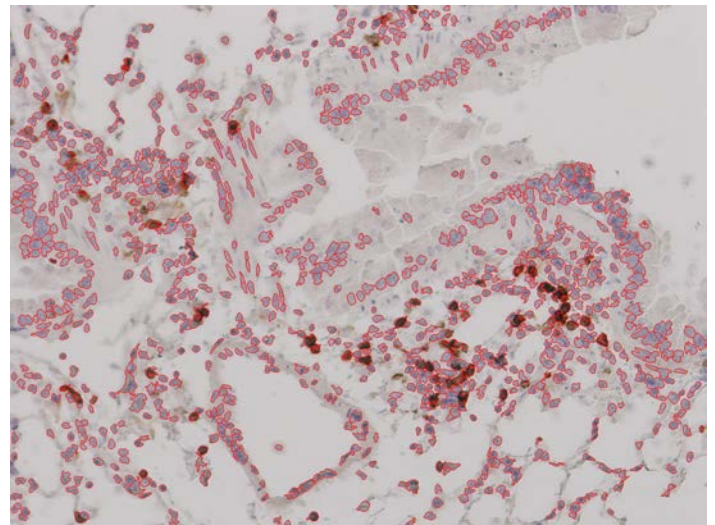

952 nucleated cells

Supplementary Figure 7  
Page 12/29

PBS Lung 2-1  
2 dpi

CD8<sup>+</sup>/CD4<sup>+</sup> Cell Annotations

Nucleated Cell Annotations

CD8<sup>+</sup>

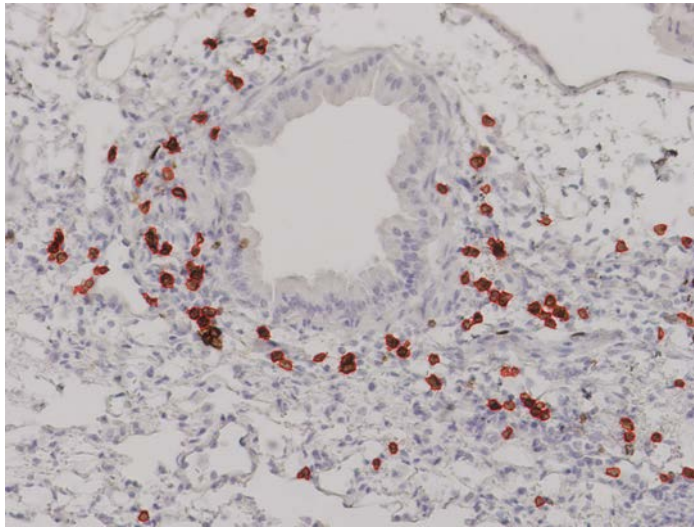

85 CD8<sup>+</sup> cells

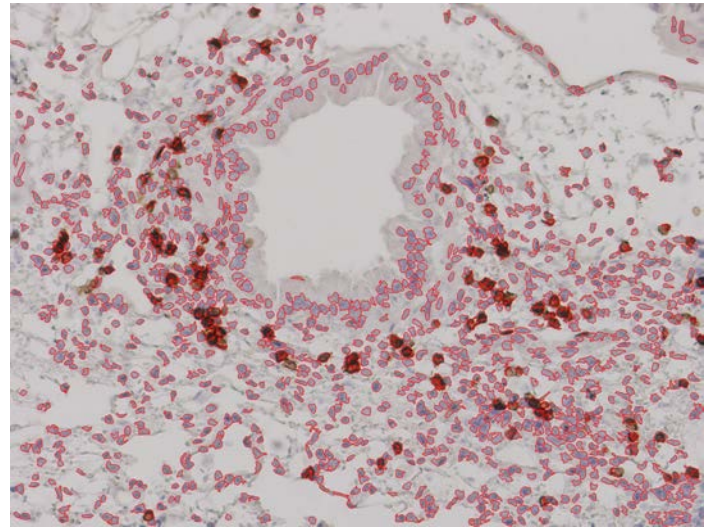

1166 nucleated cells

CD4<sup>+</sup>

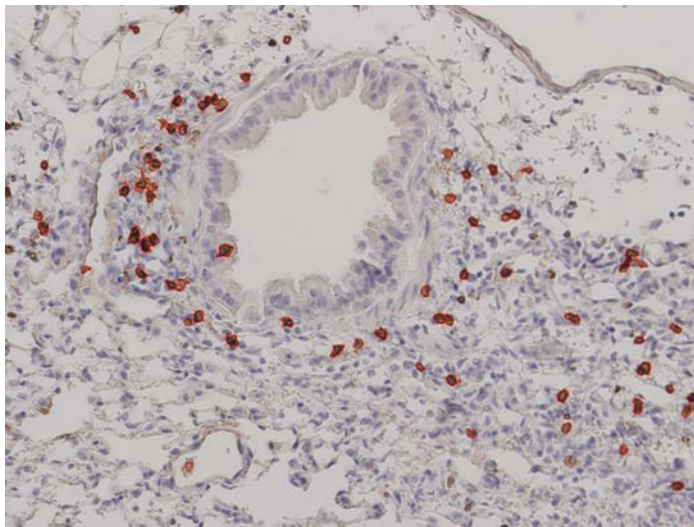

69 CD4<sup>+</sup> cells

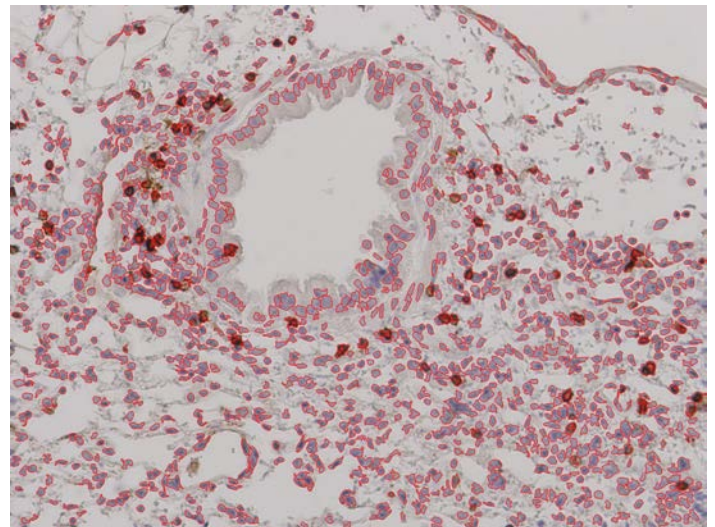

1229 nucleated cells

Supplementary Figure 7  
Page 13/29

PBS Lung 2-2  
2 dpi

CD8<sup>+</sup>/CD4<sup>+</sup> Cell Annotations

Nucleated Cell Annotations

CD8<sup>+</sup>

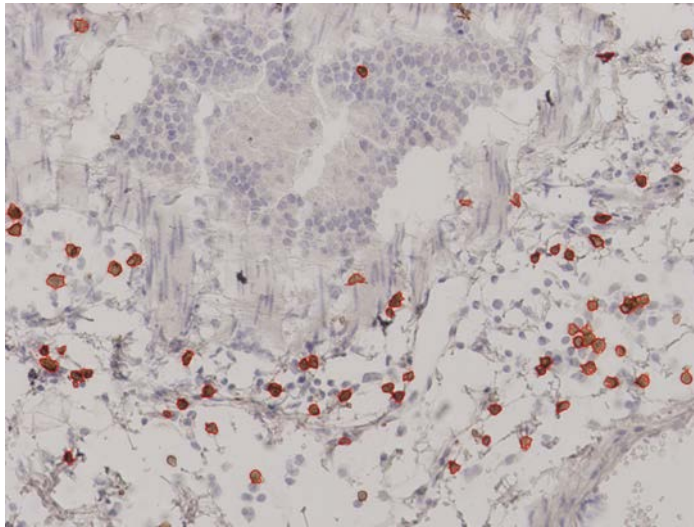

62 CD8<sup>+</sup> cells

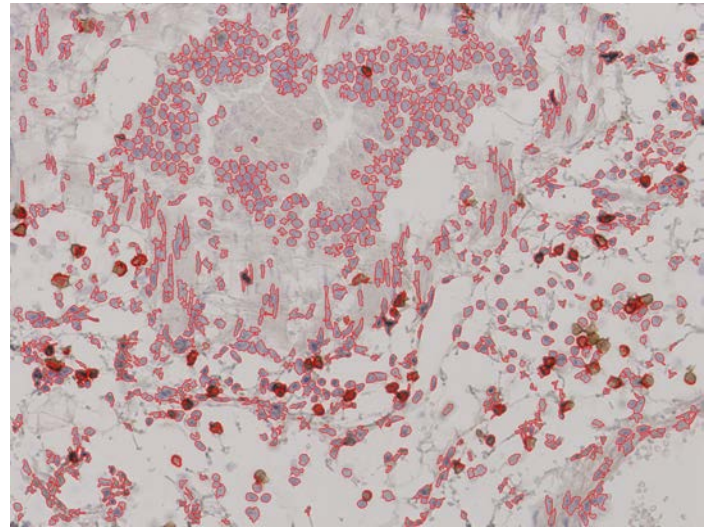

1126 nucleated cells

CD4<sup>+</sup>

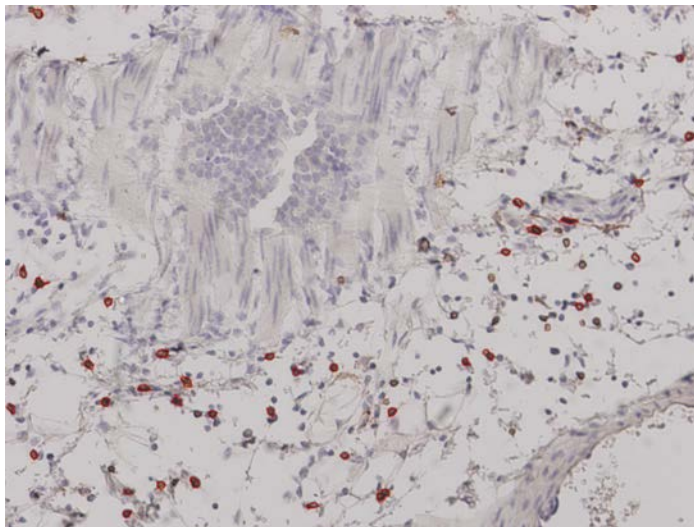

37 CD4<sup>+</sup> cells

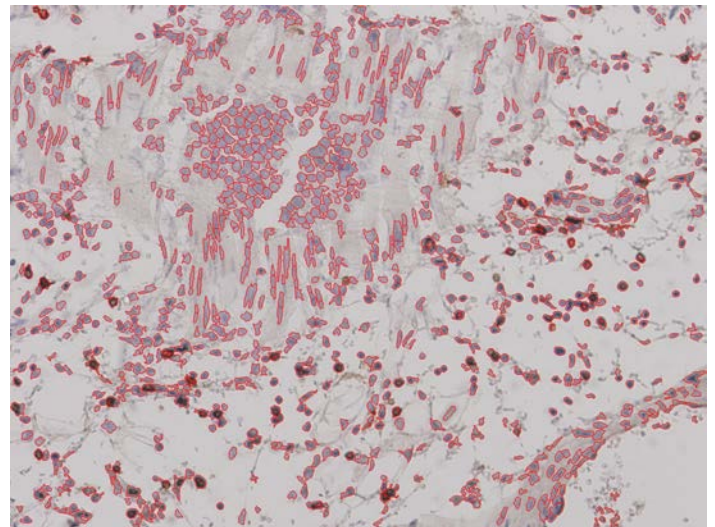

1034 nucleated cells

Supplementary Figure 7  
Page 14/29

PBS Lung 3-1  
2 dpi

CD8<sup>+</sup>/CD4<sup>+</sup> Cell Annotations

Nucleated Cell Annotations

CD8<sup>+</sup>

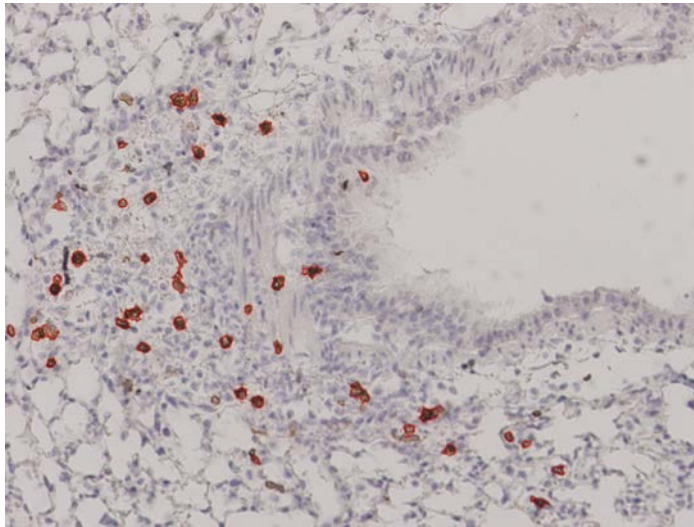

42 CD8<sup>+</sup> cells

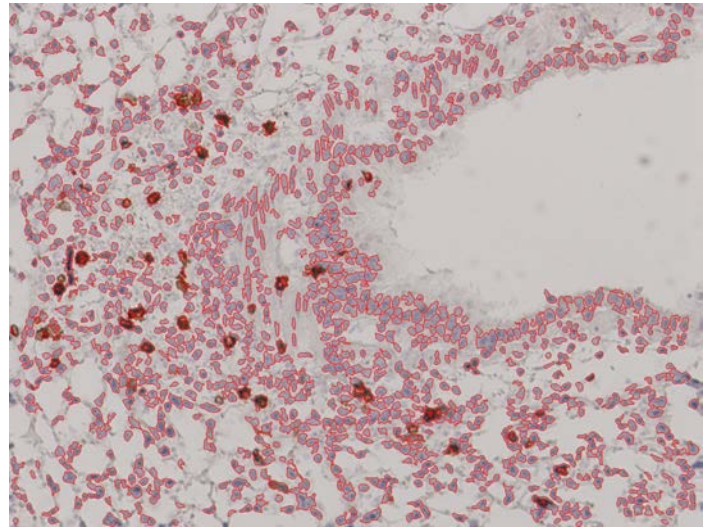

1259 nucleated cells

CD4<sup>+</sup>

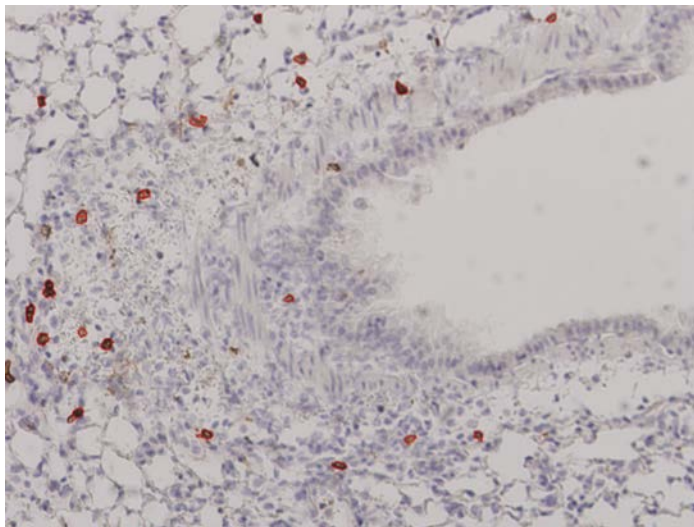

23 CD4<sup>+</sup> cells

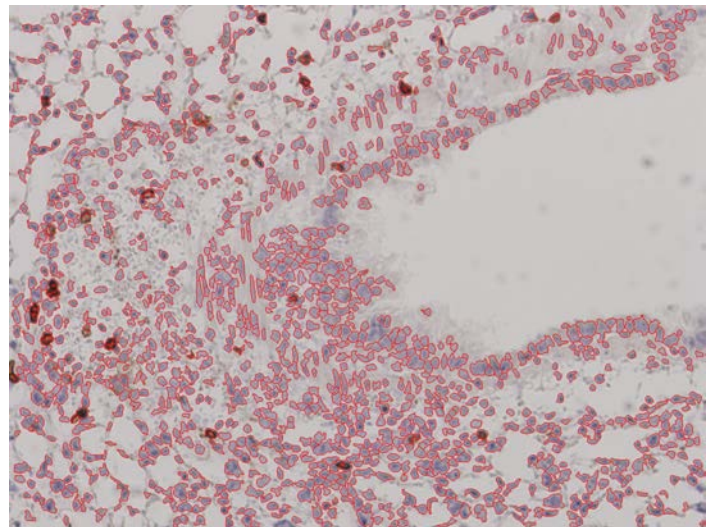

1241 nucleated cells

Supplementary Figure 7  
Page 15/29

PBS Lung 3-2  
2 dpi

CD8<sup>+</sup>/CD4<sup>+</sup> Cell Annotations

Nucleated Cell Annotations

CD8<sup>+</sup>

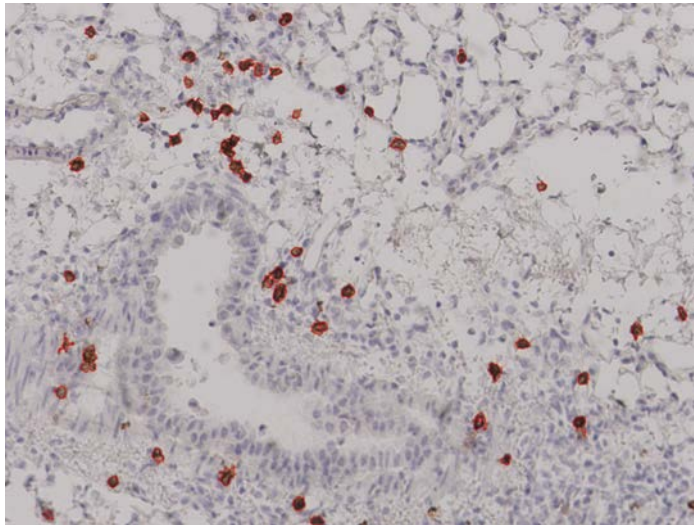

50 CD8<sup>+</sup> cells

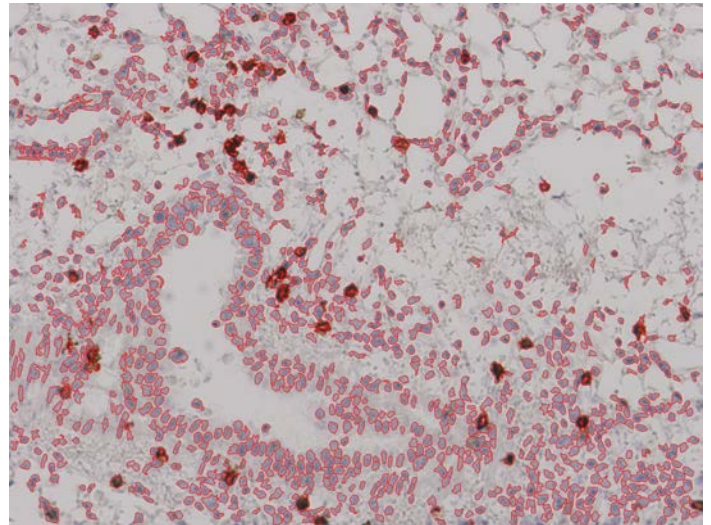

1208 nucleated cells

CD4<sup>+</sup>

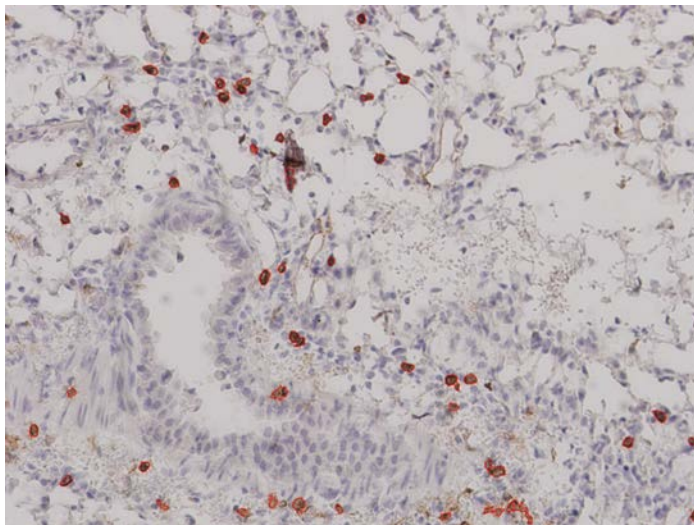

48 CD4<sup>+</sup> cells

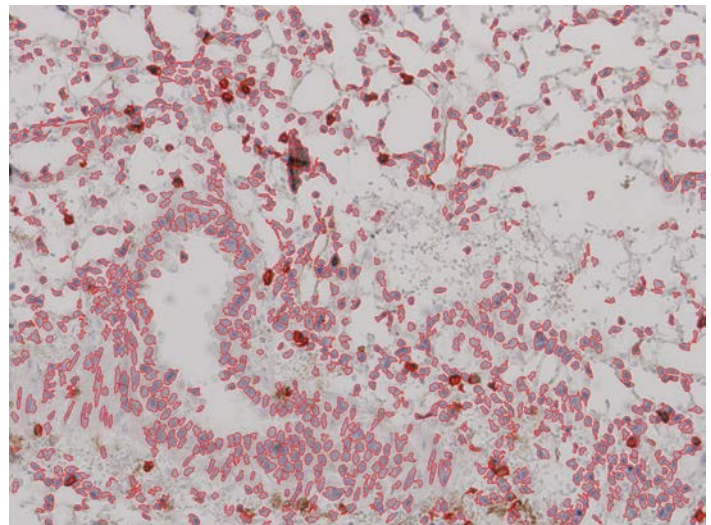

1205 nucleated cells

Supplementary Figure 7  
Page 16/29

MIT-T-COVID Lung 1-1  
7 dpi

CD8<sup>+</sup>/CD4<sup>+</sup> Cell Annotations

Nucleated Cell Annotations

CD8<sup>+</sup>

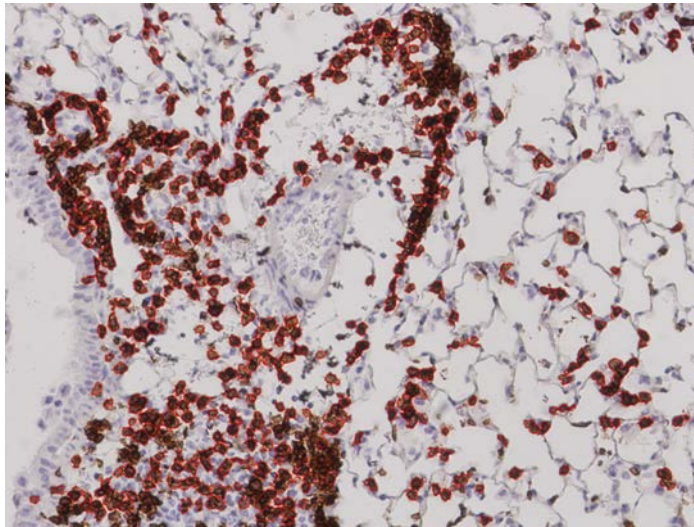

383 CD8<sup>+</sup> cells

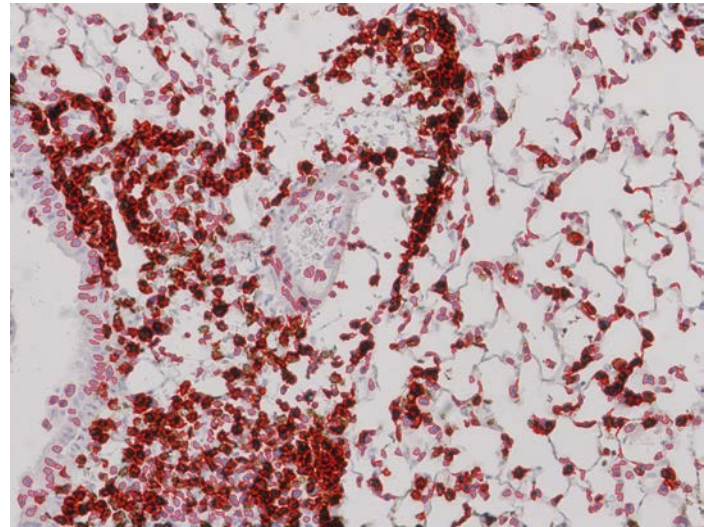

1379 nucleated cells

CD4<sup>+</sup>

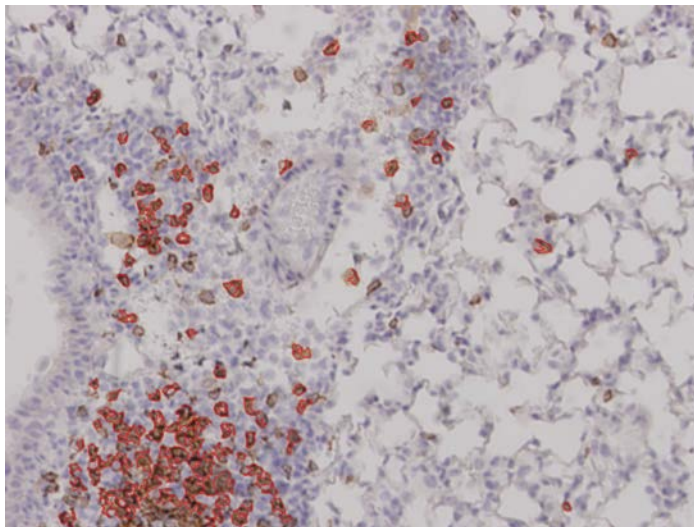

139 CD4<sup>+</sup> cells

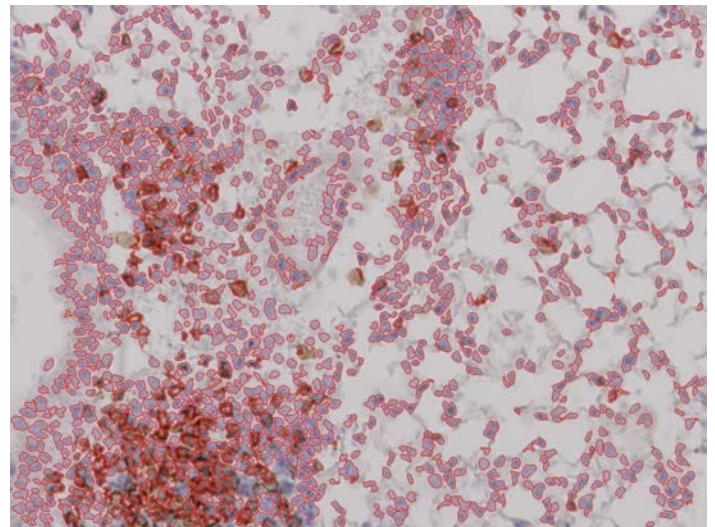

1424 nucleated cells



Supplementary Figure 7  
Page 17/29

MIT-T-COVID Lung 1-2  
7 dpi

CD8<sup>+</sup>/CD4<sup>+</sup> Cell Annotations

Nucleated Cell Annotations

CD8<sup>+</sup>

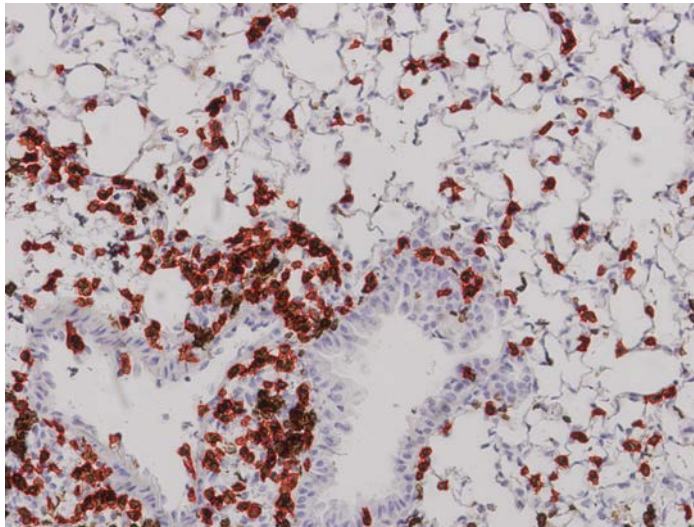

293 CD8<sup>+</sup> cells

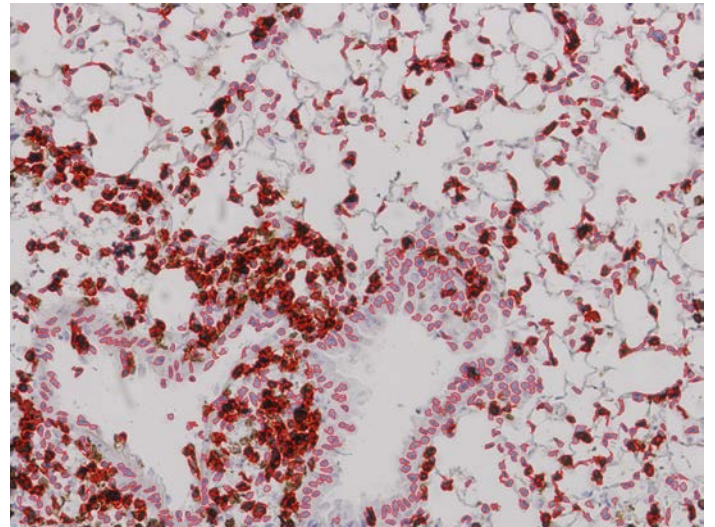

1226 nucleated cells

CD4<sup>+</sup>

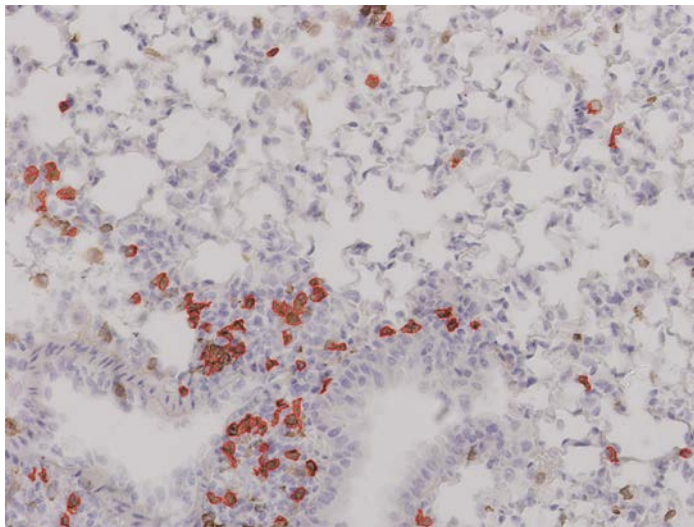

78 CD4<sup>+</sup> cells

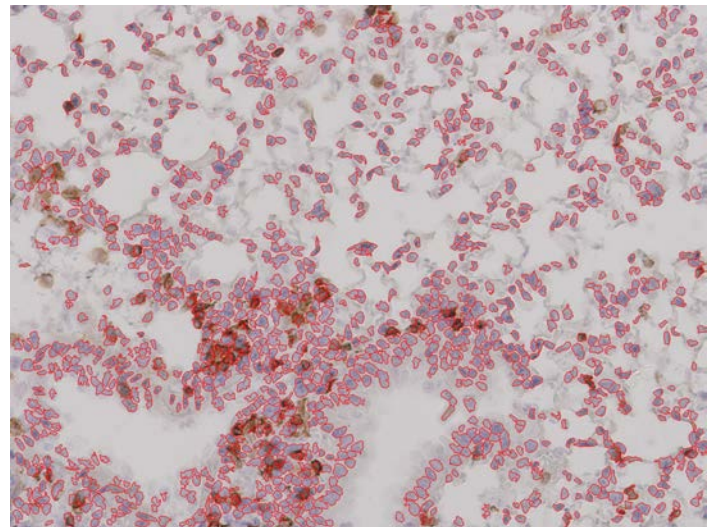

1209 nucleated cells

MIT-T-COVID Lung 2-1  
7 dpi

CD8<sup>+</sup>/CD4<sup>+</sup> Cell Annotations

Nucleated Cell Annotations

CD8<sup>+</sup>

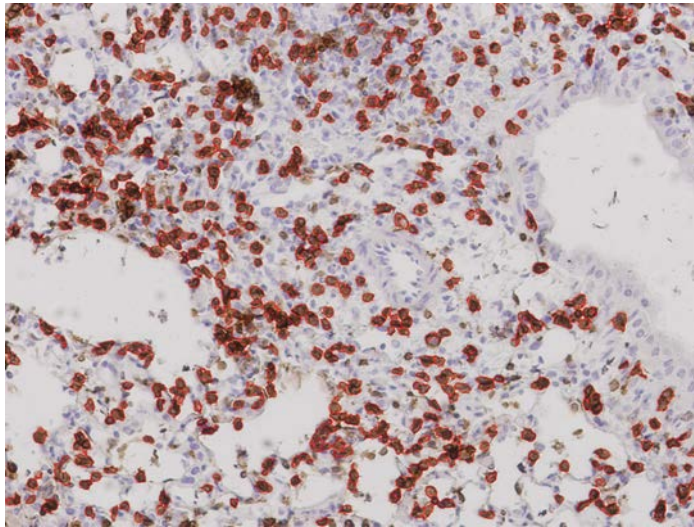

424 CD8<sup>+</sup> cells

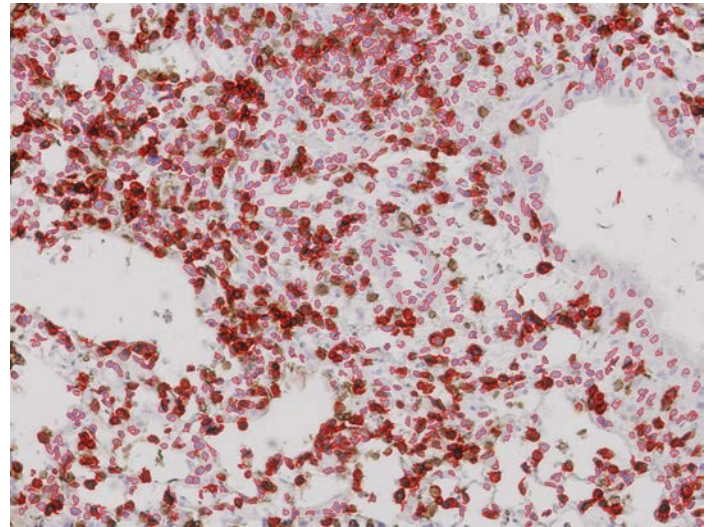

1539 nucleated cells

CD4<sup>+</sup>

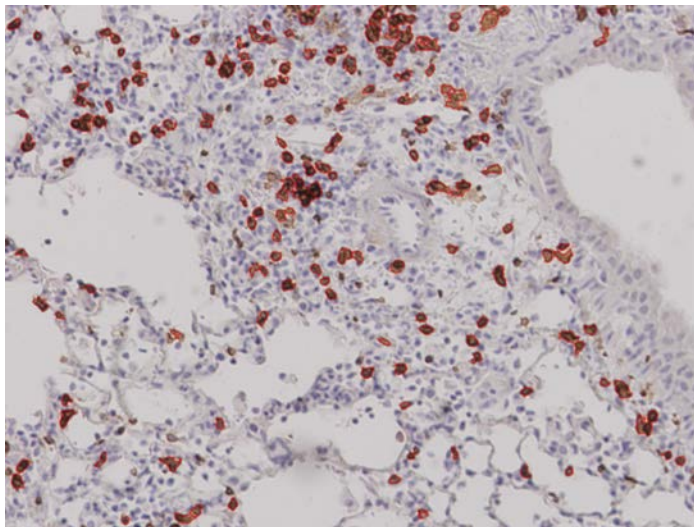

152 CD4<sup>+</sup> cells

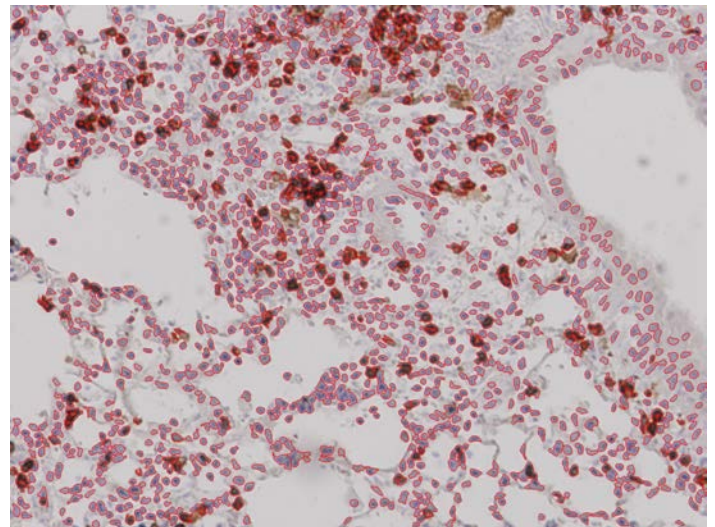

1446 nucleated cells

MIT-T-COVID Lung 2-2  
7 dpi

CD8<sup>+</sup>/CD4<sup>+</sup> Cell Annotations

Nucleated Cell Annotations

CD8<sup>+</sup>

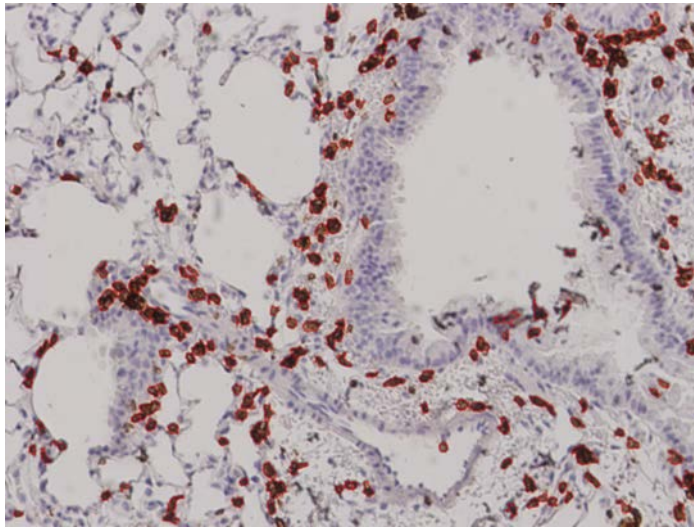

191 CD8<sup>+</sup> cells

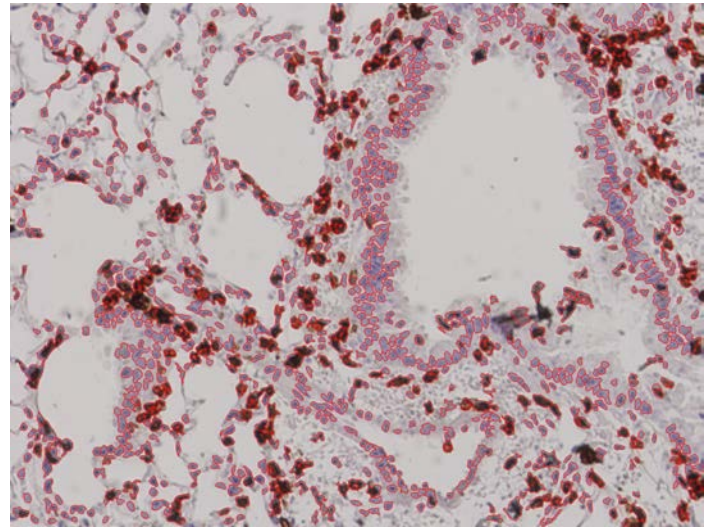

1149 nucleated cells

CD4<sup>+</sup>

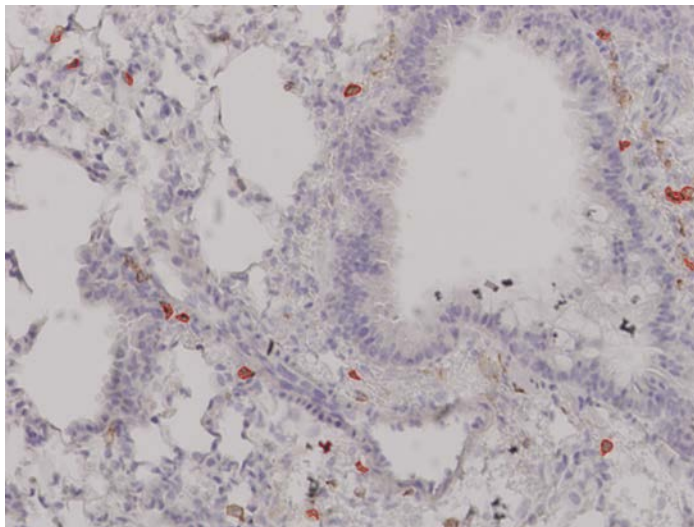

17 CD4<sup>+</sup> cells

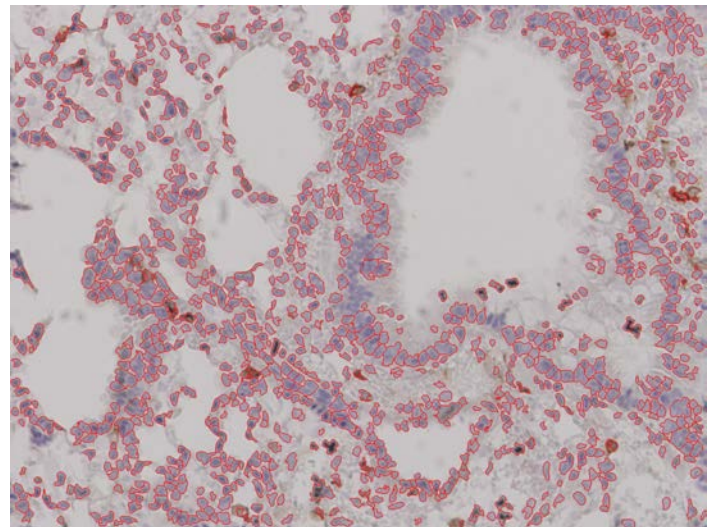

1052 nucleated cells

Supplementary Figure 7  
Page 20/29

Pfizer/BNT Lung 1-1  
7 dpi

CD8<sup>+</sup>/CD4<sup>+</sup> Cell Annotations

Nucleated Cell Annotations

CD8<sup>+</sup>

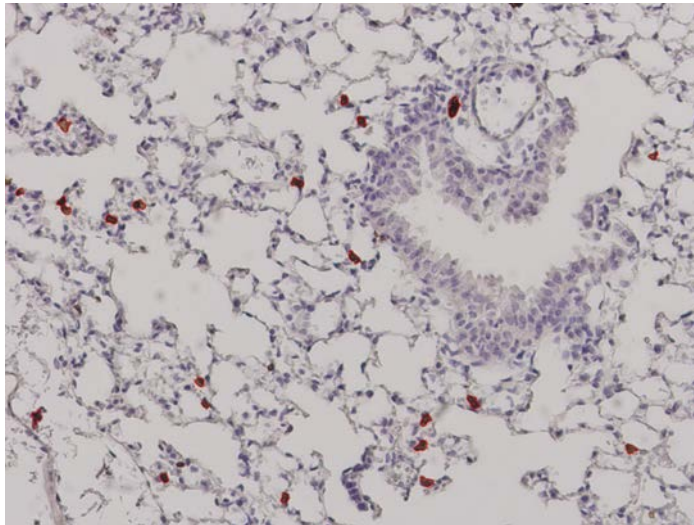

23 CD8<sup>+</sup> cells

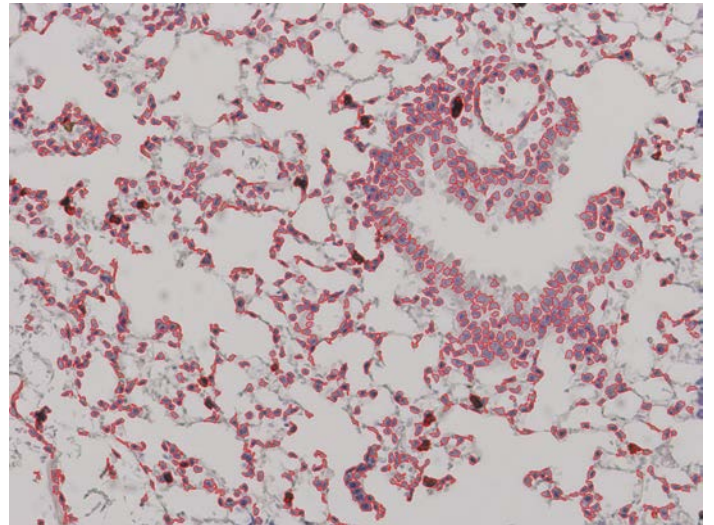

1093 nucleated cells

CD4<sup>+</sup>

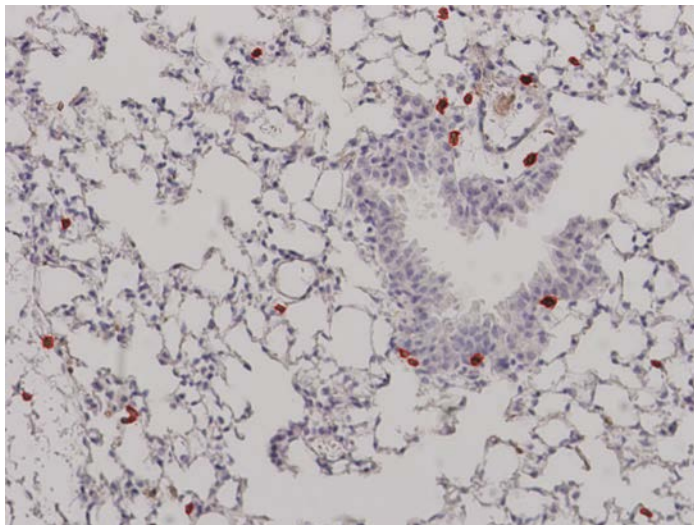

21 CD4<sup>+</sup> cells

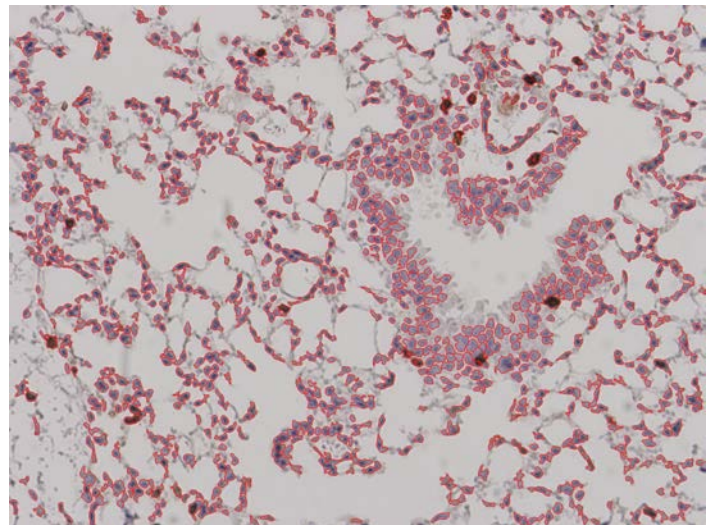

1119 nucleated cells

Supplementary Figure 7  
Page 21/29

Pfizer/BNT Lung 1-2  
7 dpi

CD8<sup>+</sup>/CD4<sup>+</sup> Cell Annotations

Nucleated Cell Annotations

CD8<sup>+</sup>

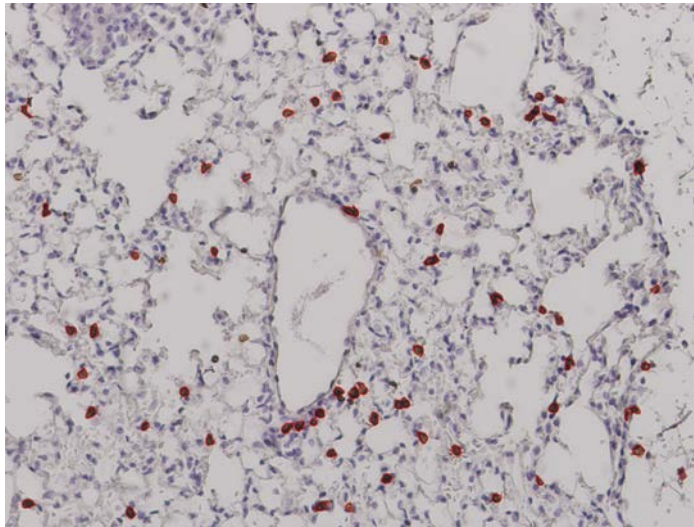

63 CD8<sup>+</sup> cells

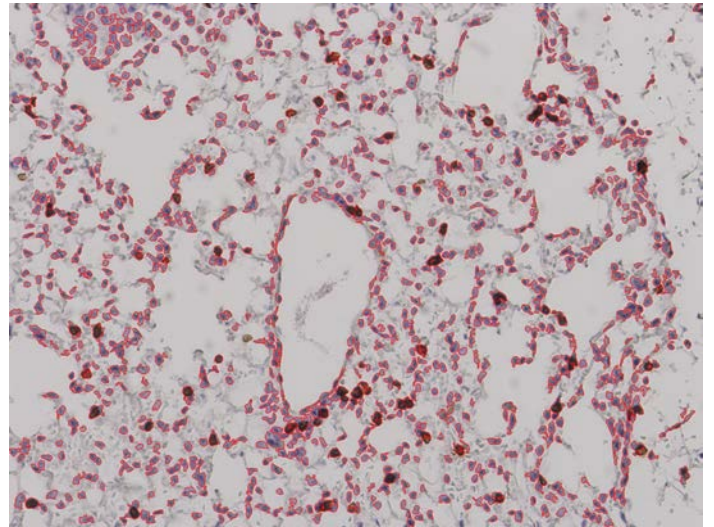

1026 nucleated cells

CD4<sup>+</sup>

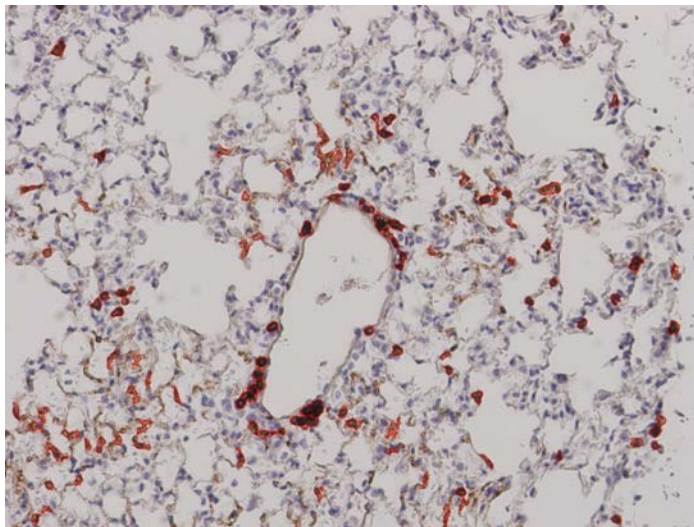

110 CD4<sup>+</sup> cells

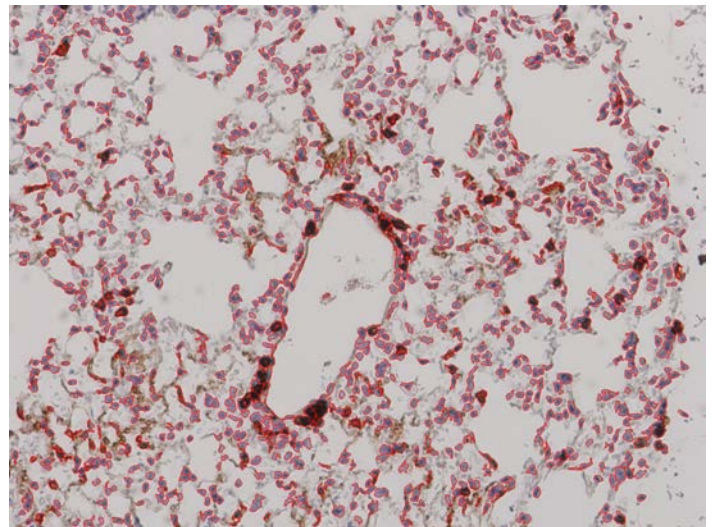

1089 nucleated cells

Supplementary Figure 7  
Page 22/29

Pfizer/BNT Lung 1-3  
7 dpi

CD8<sup>+</sup>/CD4<sup>+</sup> Cell Annotations

Nucleated Cell Annotations

CD8<sup>+</sup>

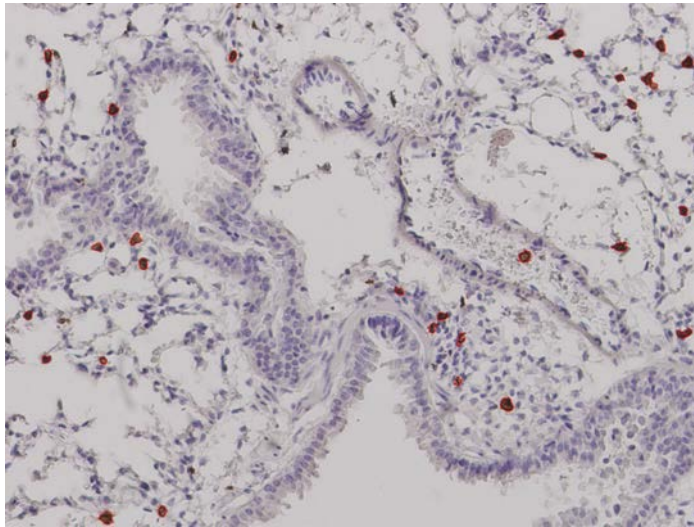

32 CD8<sup>+</sup> cells

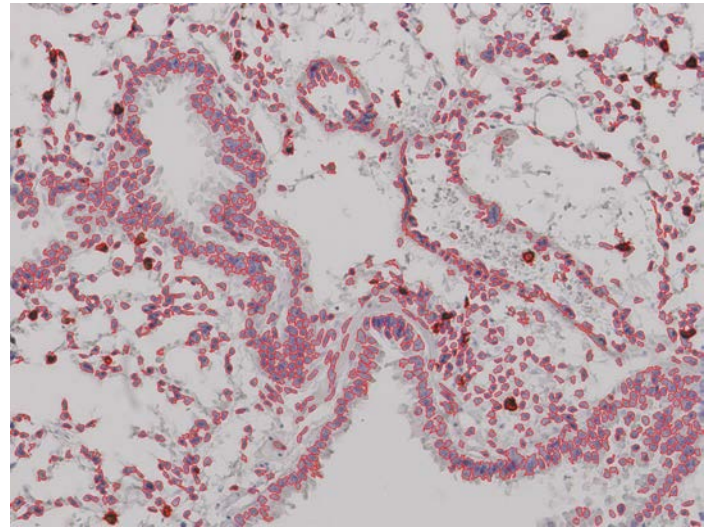

1236 nucleated cells

CD4<sup>+</sup>

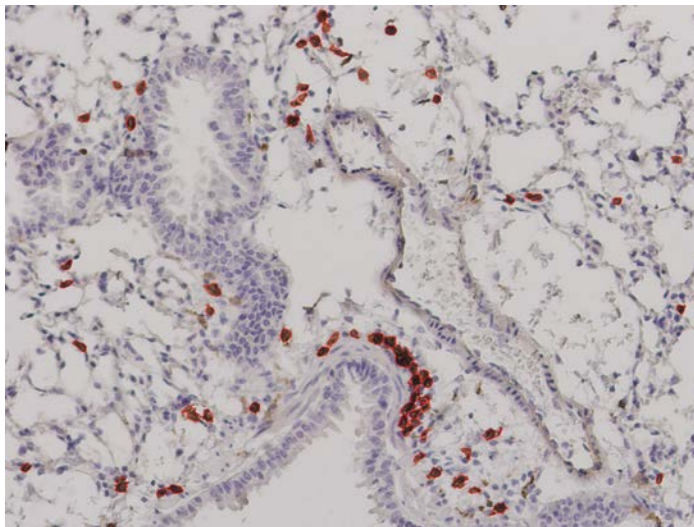

63 CD4<sup>+</sup> cells

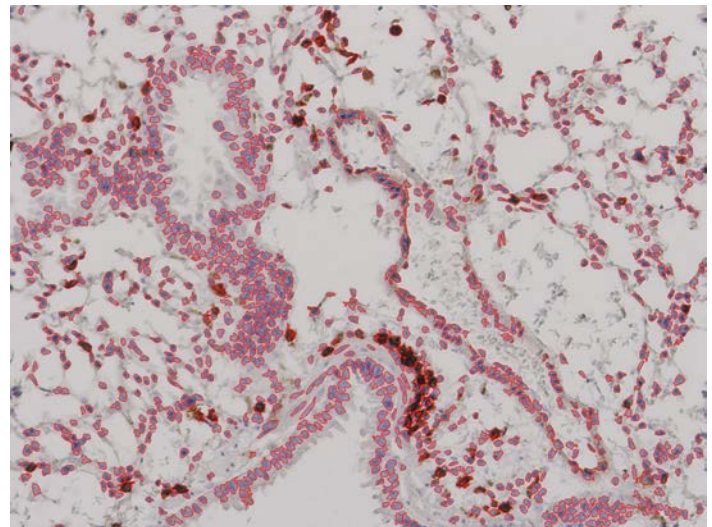

1153 nucleated cells

Supplementary Figure 7  
Page 23/29

Pfizer/BNT Lung 2-1  
7 dpi

CD8<sup>+</sup>/CD4<sup>+</sup> Cell Annotations

Nucleated Cell Annotations

CD8<sup>+</sup>

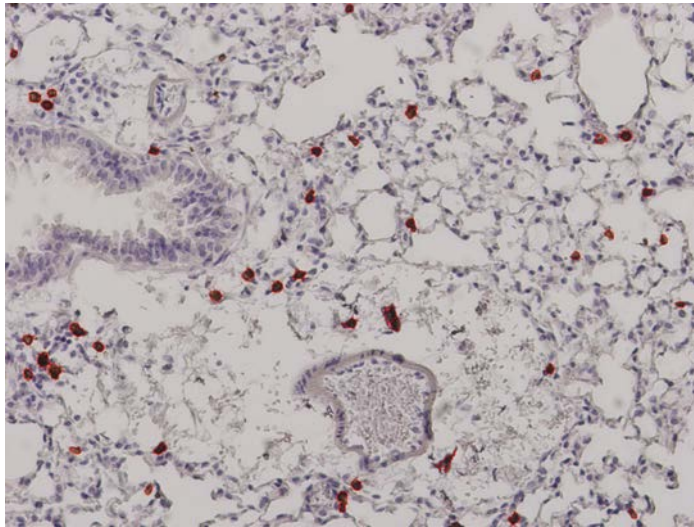

42 CD8<sup>+</sup> cells

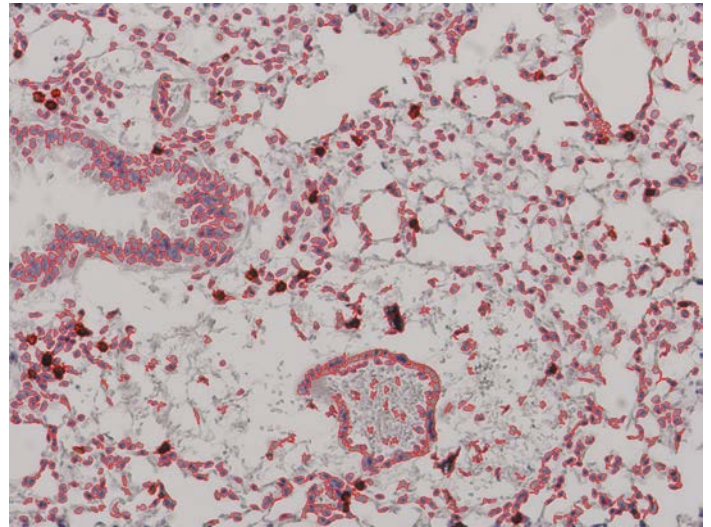

1108 nucleated cells

CD4<sup>+</sup>

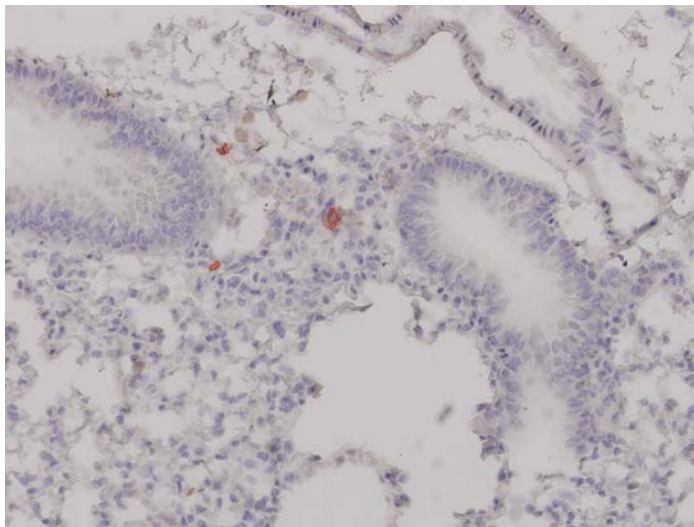

3 CD4<sup>+</sup> cells

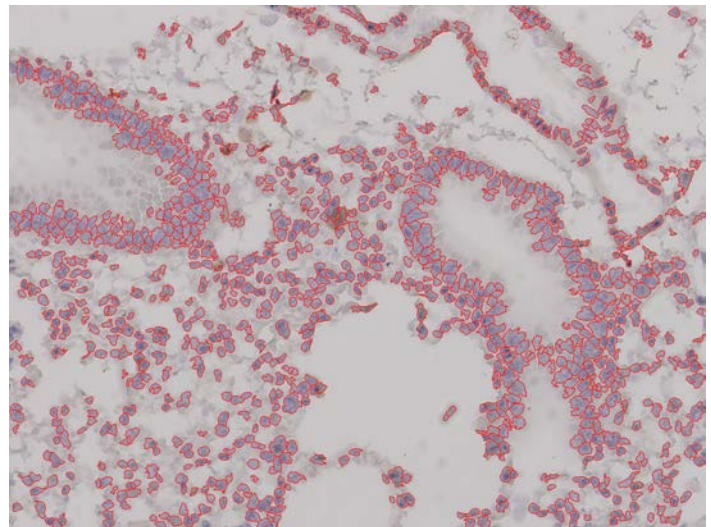

1036 nucleated cells

Supplementary Figure 7  
Page 24/29

Pfizer/BNT Lung 3-1  
7 dpi

CD8<sup>+</sup>/CD4<sup>+</sup> Cell Annotations

Nucleated Cell Annotations

CD8<sup>+</sup>

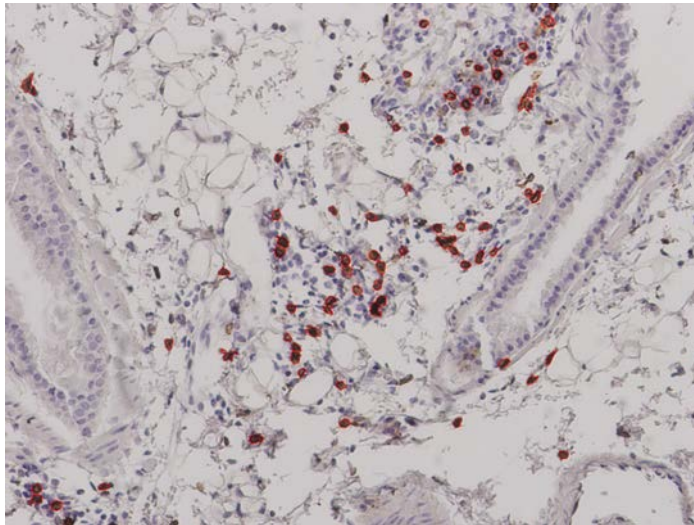

69 CD8<sup>+</sup> cells

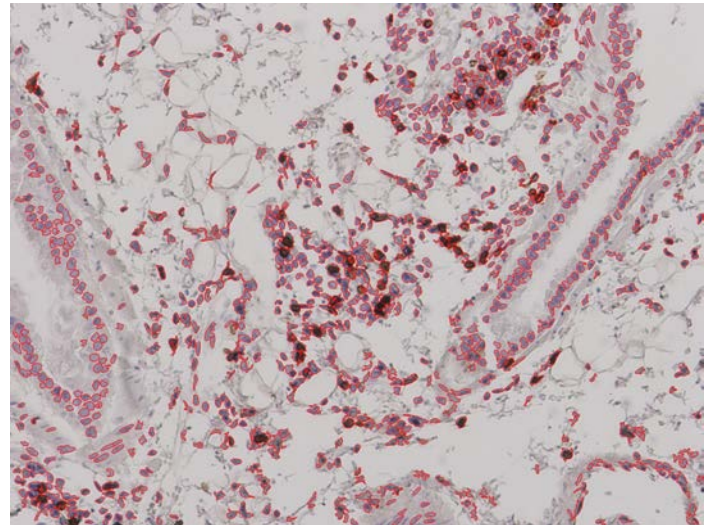

969 nucleated cells

CD4<sup>+</sup>

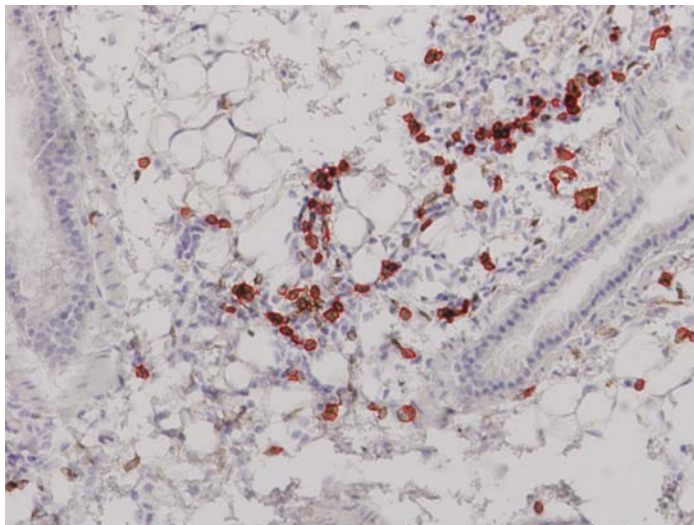

81 CD4<sup>+</sup> cells

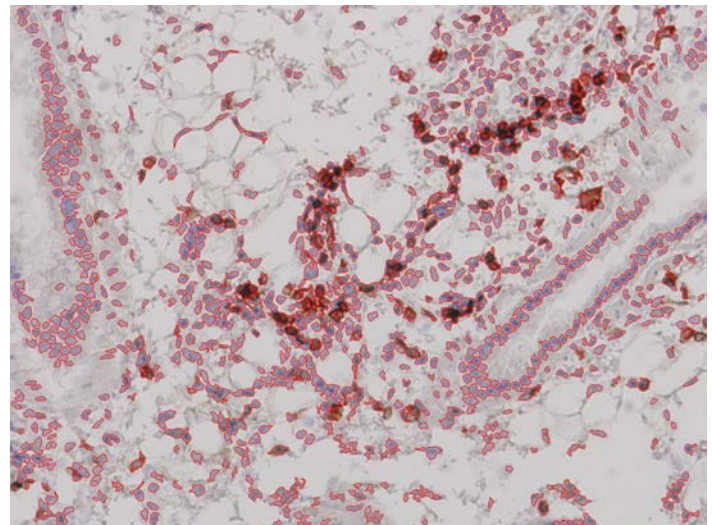

1043 nucleated cells



Supplementary Figure 7  
Page 25/29

PBS Lung 1-1  
7 dpi

CD8<sup>+</sup>/CD4<sup>+</sup> Cell Annotations

Nucleated Cell Annotations

CD8<sup>+</sup>

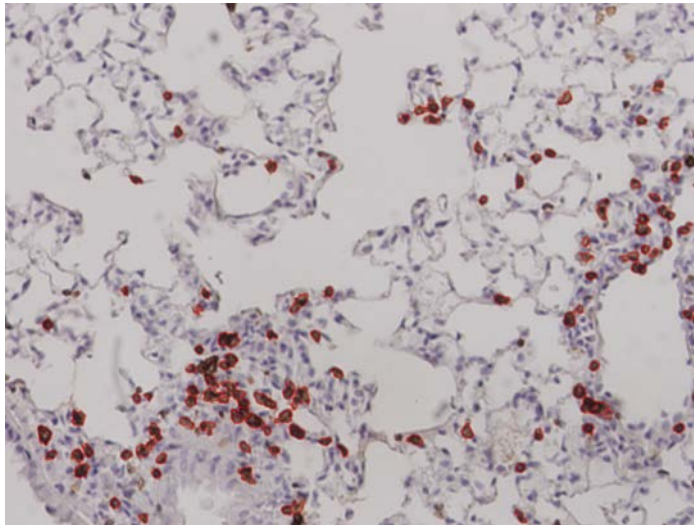

108 CD8<sup>+</sup> cells

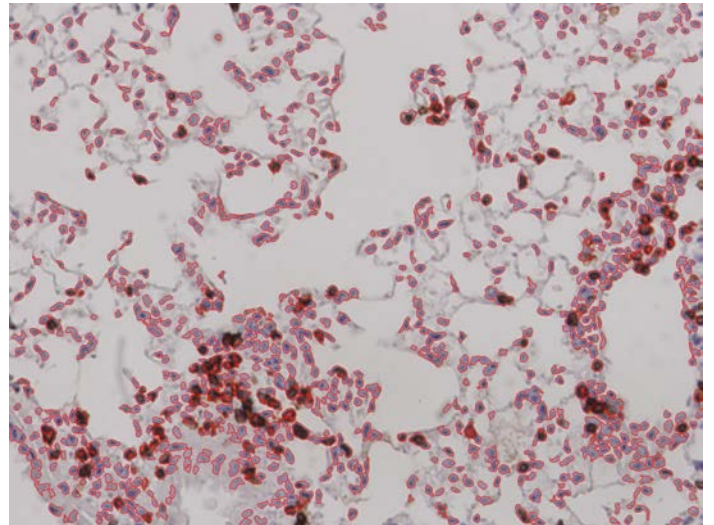

912 nucleated cells

CD4<sup>+</sup>

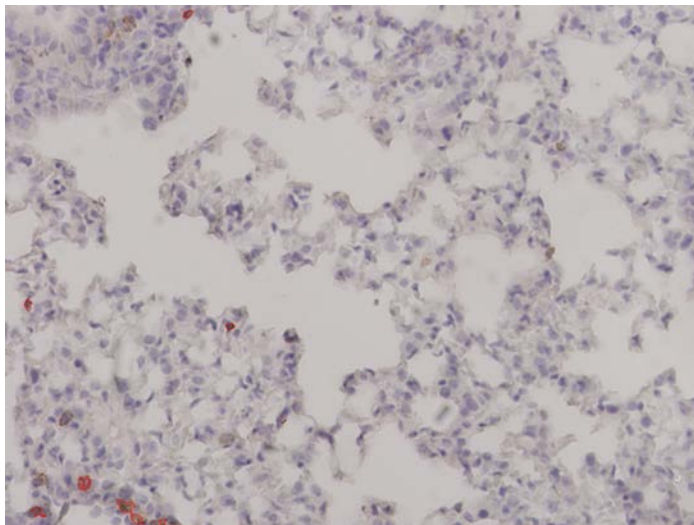

9 CD4<sup>+</sup> cells

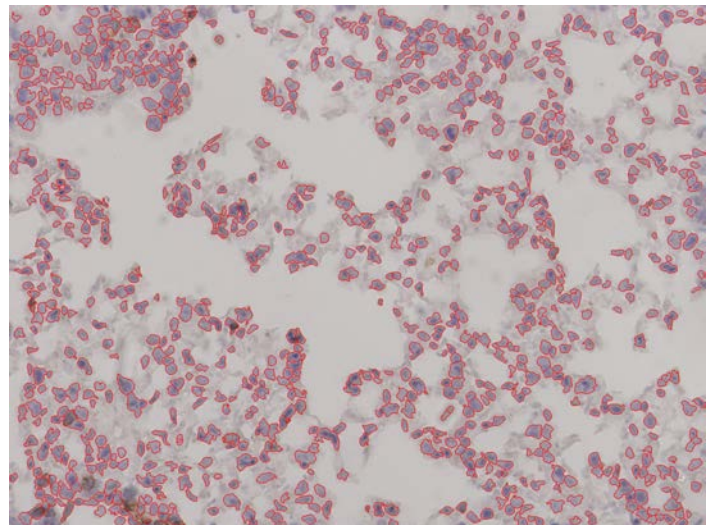

892 nucleated cells

Supplementary Figure 7  
Page 26/29

PBS Lung 2-1  
7 dpi

CD8<sup>+</sup>/CD4<sup>+</sup> Cell Annotations

Nucleated Cell Annotations

CD8<sup>+</sup>

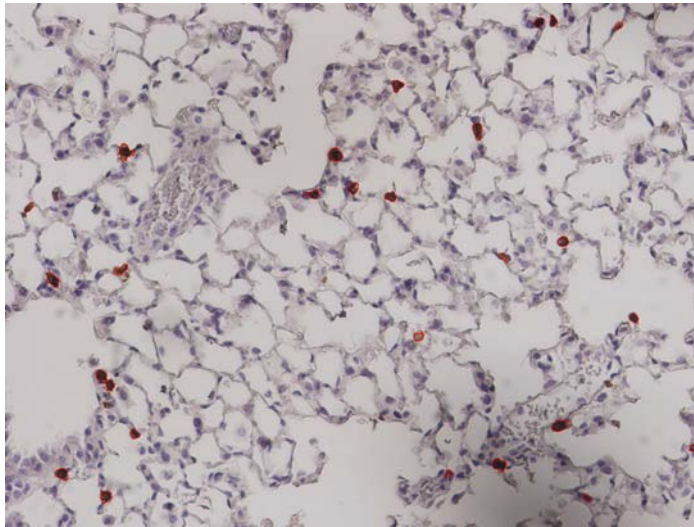

27 CD8<sup>+</sup> cells

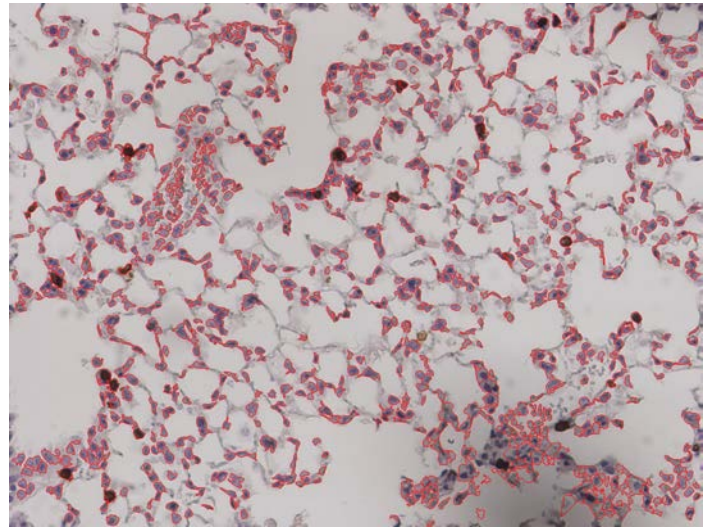

958 nucleated cells

CD4<sup>+</sup>

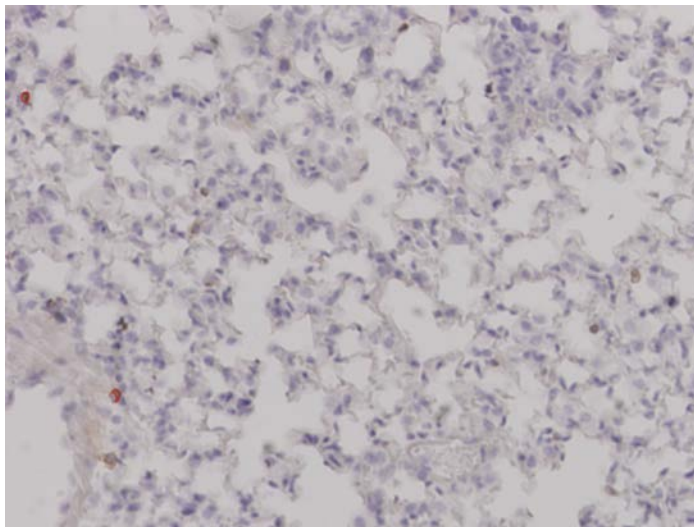

2 CD4<sup>+</sup> cells

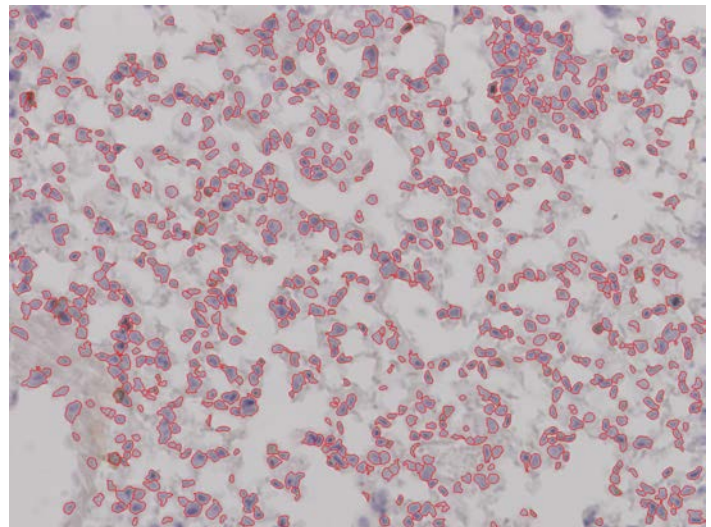

813 nucleated cells

Supplementary Figure 7  
Page 27/29

PBS Lung 2-2  
7 dpi

CD8<sup>+</sup>/CD4<sup>+</sup> Cell Annotations

Nucleated Cell Annotations

CD8<sup>+</sup>

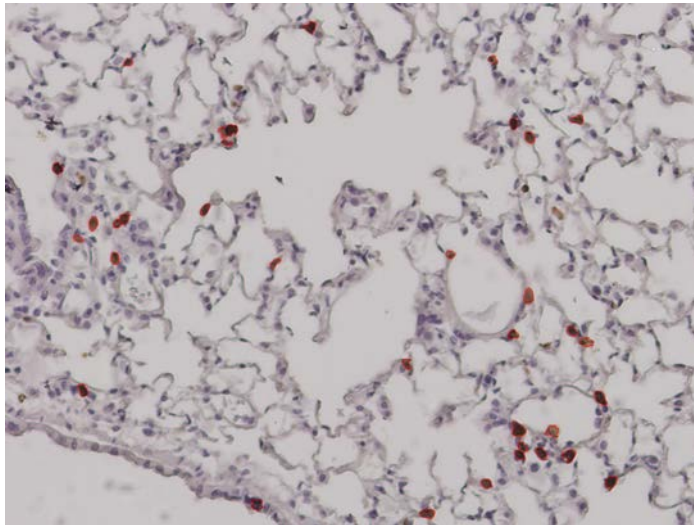

34 CD8<sup>+</sup> cells

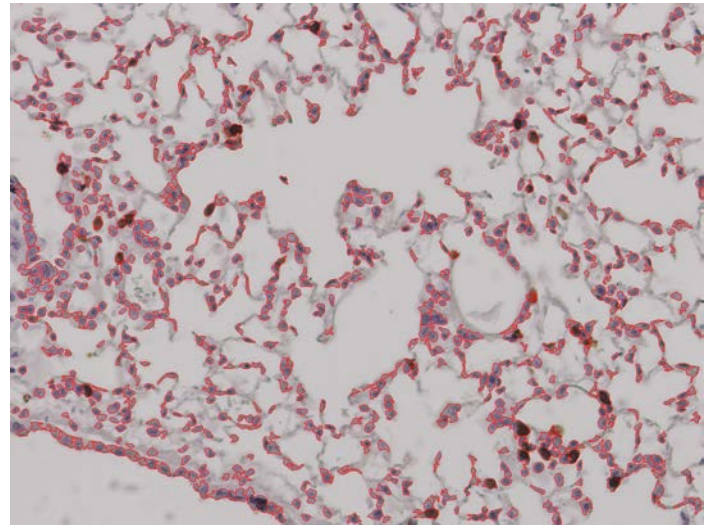

869 nucleated cells

CD4<sup>+</sup>

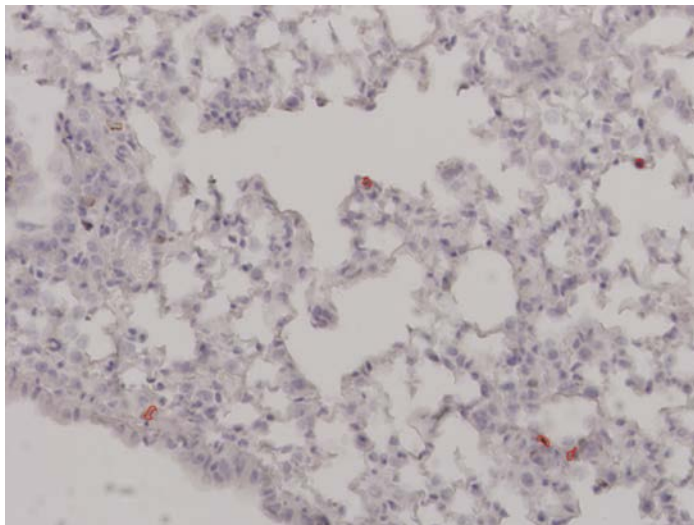

5 CD4<sup>+</sup> cells

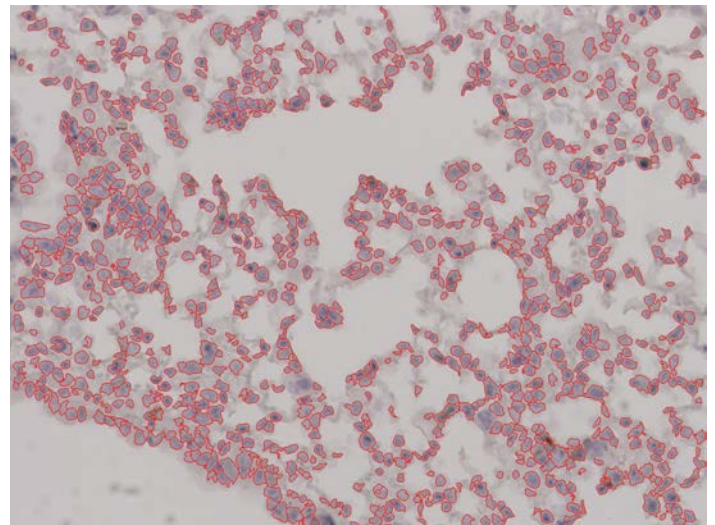

937 nucleated cells

Supplementary Figure 7  
Page 28/29

PBS Lung 4-1  
7 dpi

CD8<sup>+</sup>/CD4<sup>+</sup> Cell Annotations

Nucleated Cell Annotations

CD8<sup>+</sup>

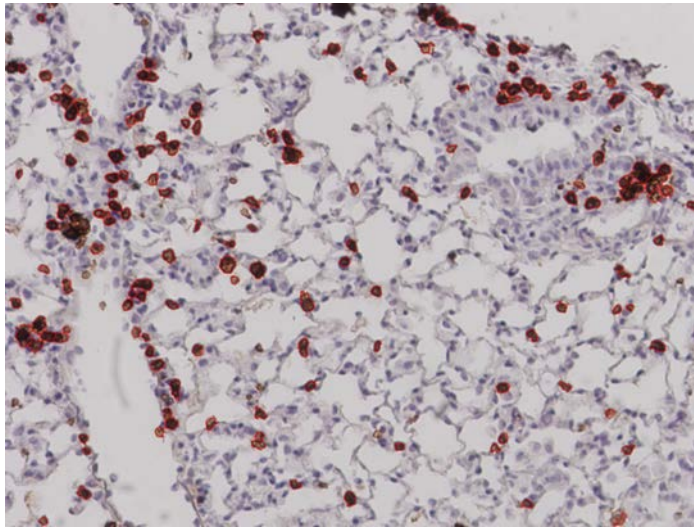

148 CD8<sup>+</sup> cells

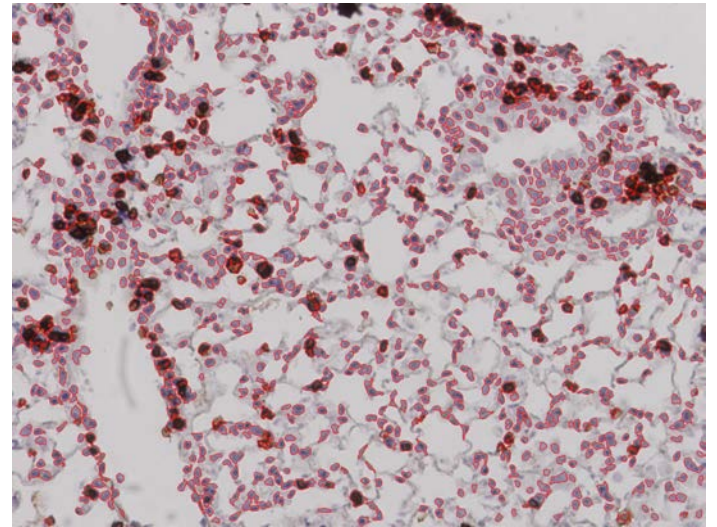

1111 nucleated cells

CD4<sup>+</sup>

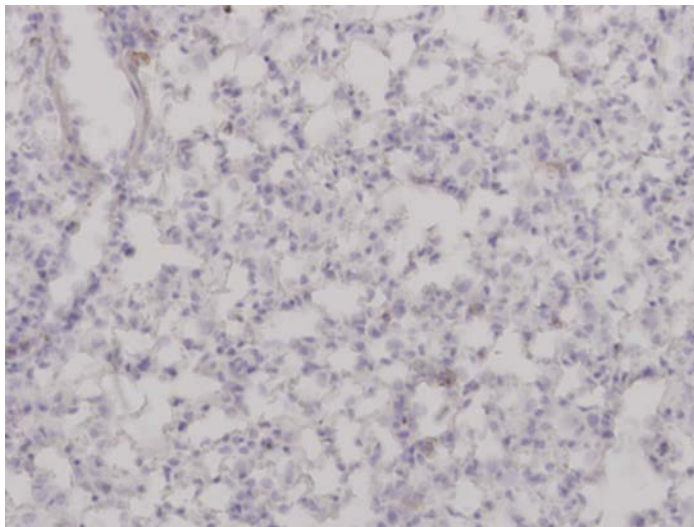

0 CD4<sup>+</sup> cells

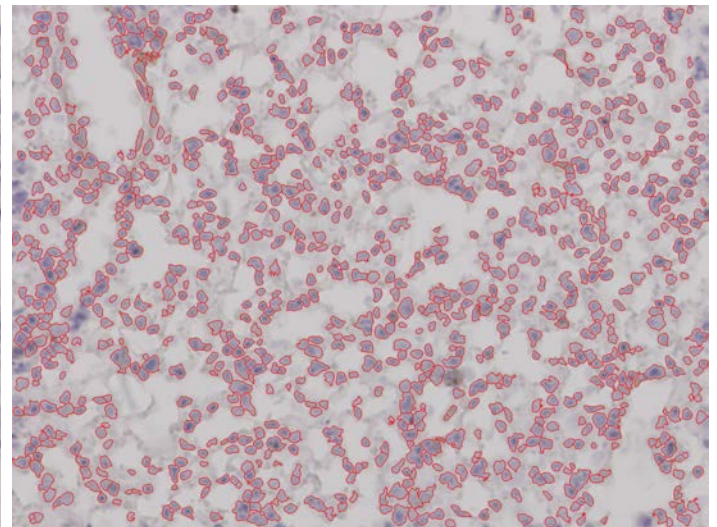

981 nucleated cells

Supplementary Figure 7  
Page 29/29

PBS Lung 5-1  
7 dpi

CD8<sup>+</sup>/CD4<sup>+</sup> Cell Annotations

Nucleated Cell Annotations

CD8<sup>+</sup>

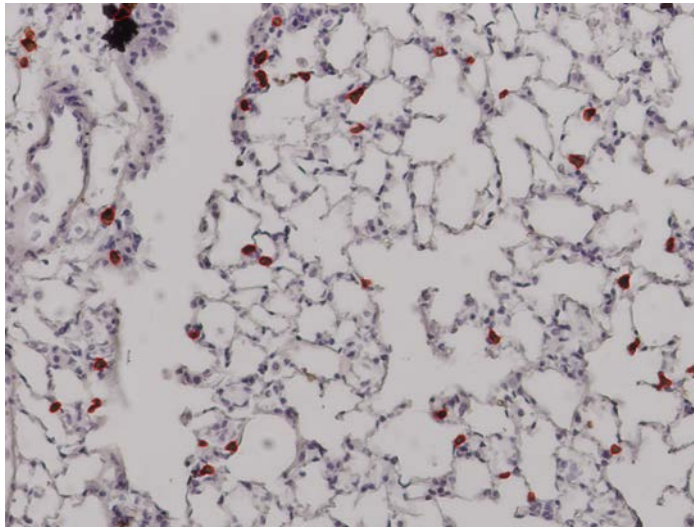

40 CD8<sup>+</sup> cells

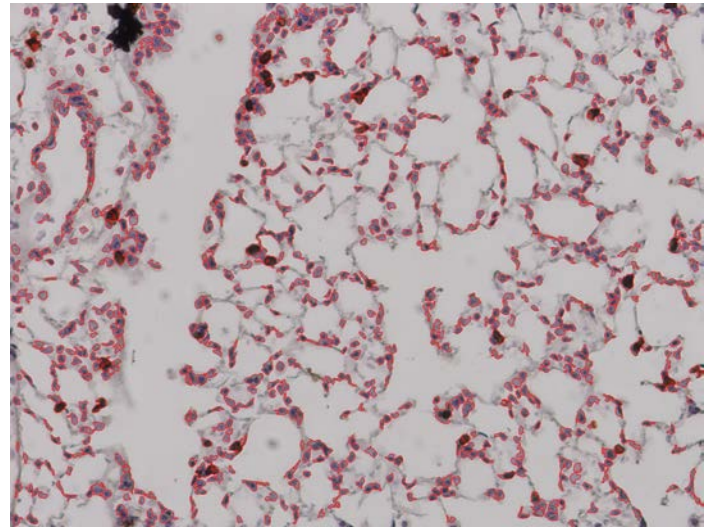

847 nucleated cells

CD4<sup>+</sup>

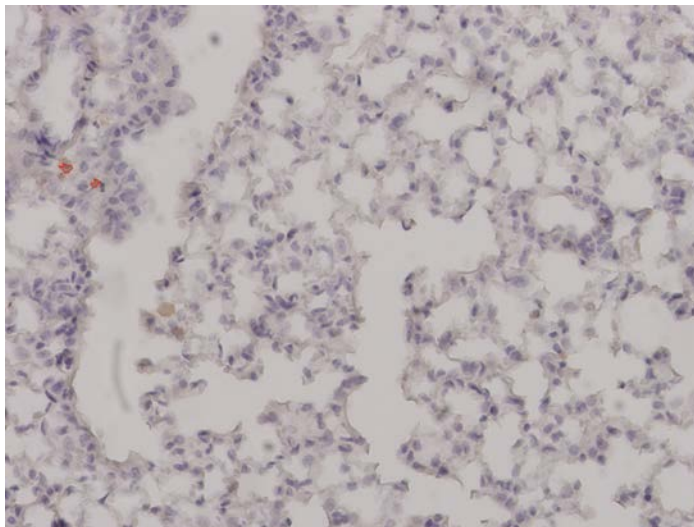

2 CD4<sup>+</sup> cells

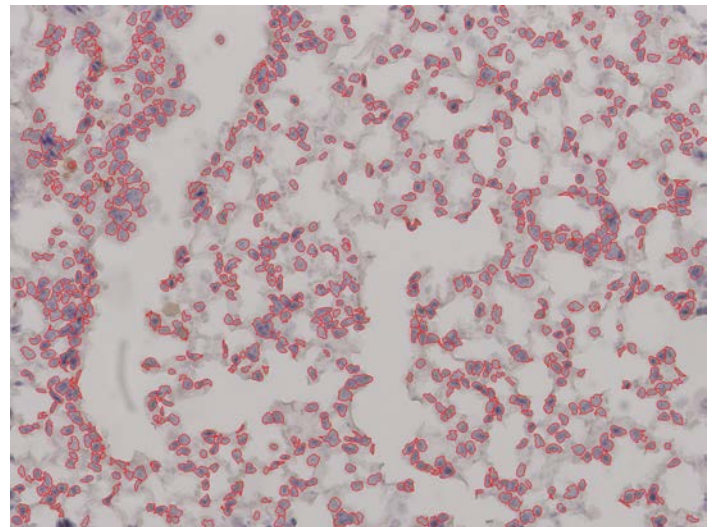

814 nucleated cells
