# Supplementary material for: A pan-variant mRNA-LNP T cell vaccine protects HLA transgenic mice from mortality after infection with SARS-CoV-2 Beta
Source: PubMed Central journal article supplement (PMC10033589; doi:10.3389/fimmu.2023.1135815), 2023-03-09
Supplement: DataSheet_3.pdf [file DataSheet_3.pdf]

Supplementary Figure 11  
Page 1/30

MIT-T-COVID Lung 1-1  
Unchallenged, Female Cohort

CD8<sup>+</sup>/CD4<sup>+</sup> Cell Annotations

Nucleated Cell Annotations

CD8<sup>+</sup>

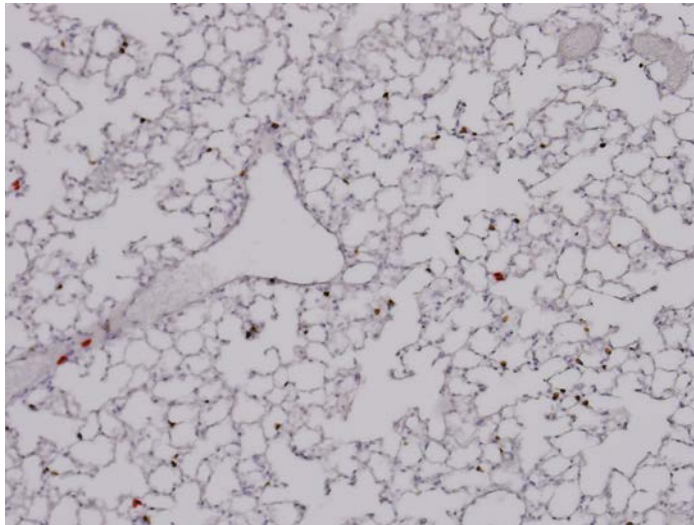

5 CD8<sup>+</sup> cells

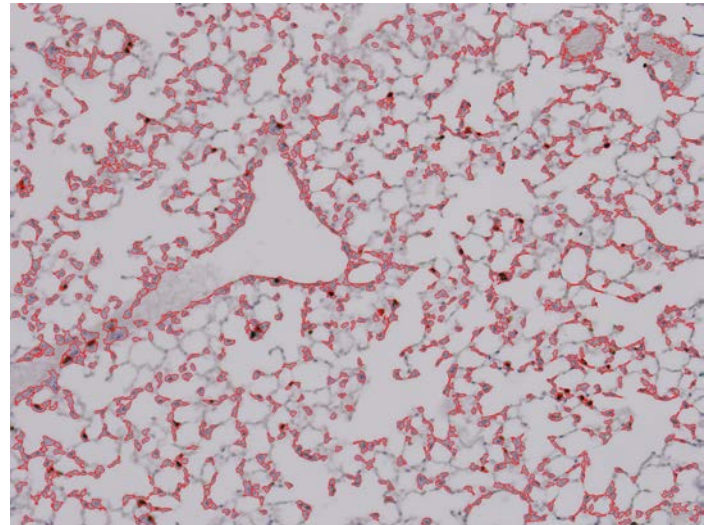

1104 nucleated cells

CD4<sup>+</sup>

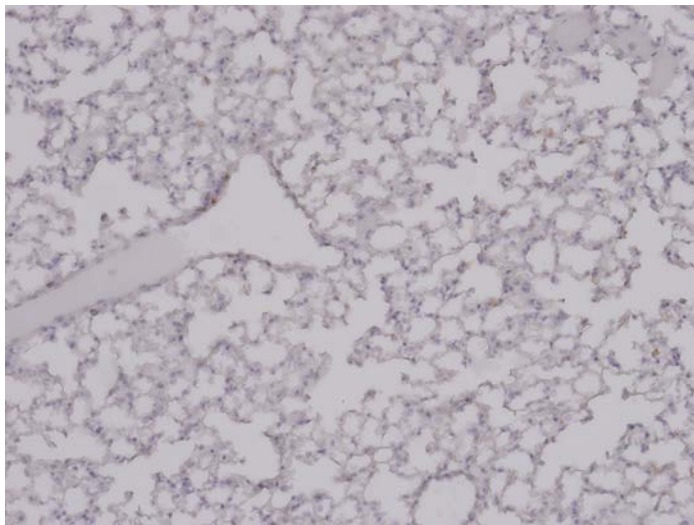

0 CD4<sup>+</sup> cells

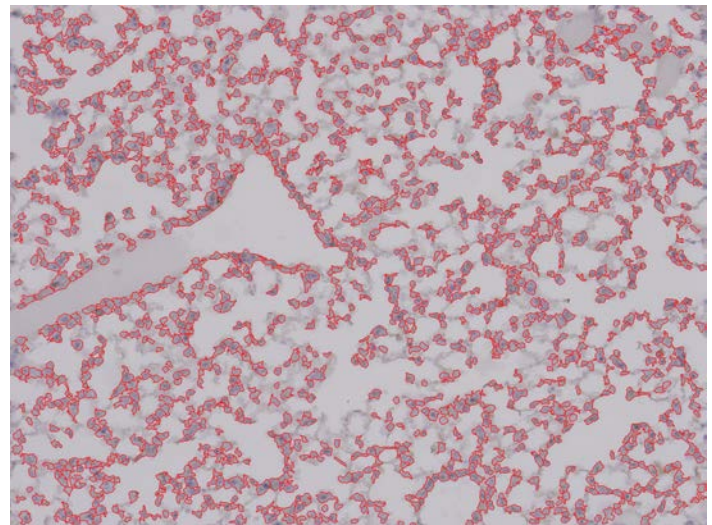

1388 nucleated cells

Supplementary Figure 11  
Page 2/30

MIT-T-COVID Lung 1-2  
Unchallenged, Female Cohort

CD8<sup>+</sup>/CD4<sup>+</sup> Cell Annotations

Nucleated Cell Annotations

CD8<sup>+</sup>

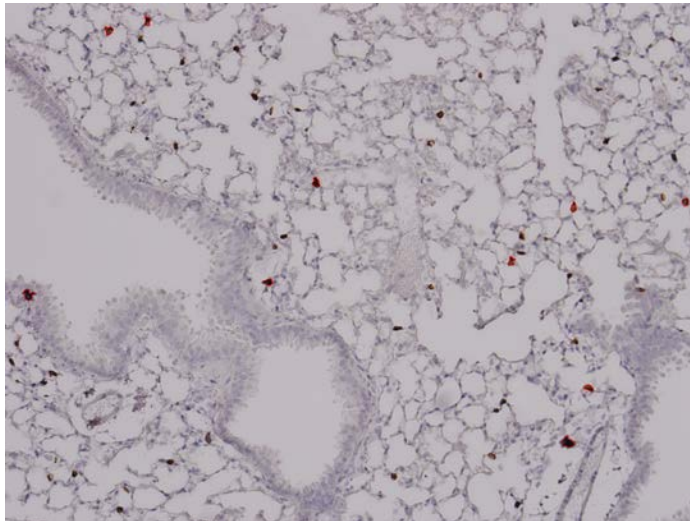

10 CD8<sup>+</sup> cells

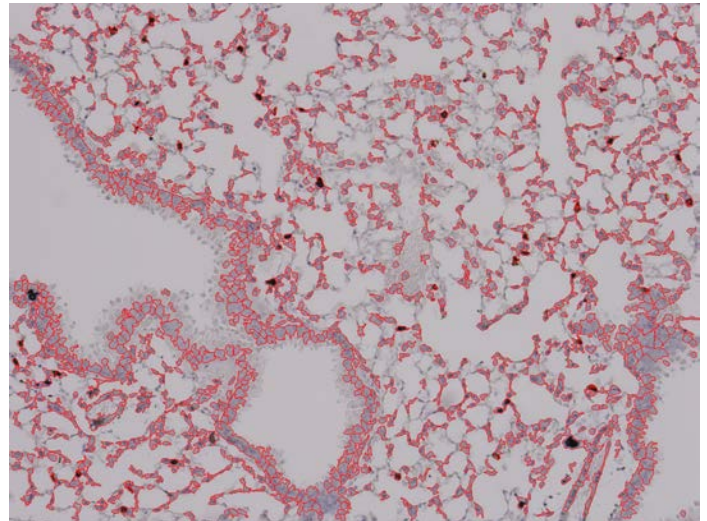

1328 nucleated cells

CD4<sup>+</sup>

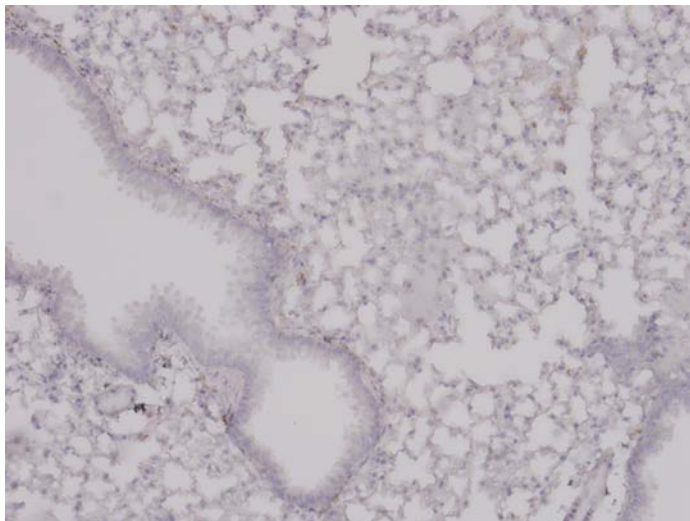

0 CD4<sup>+</sup> cells

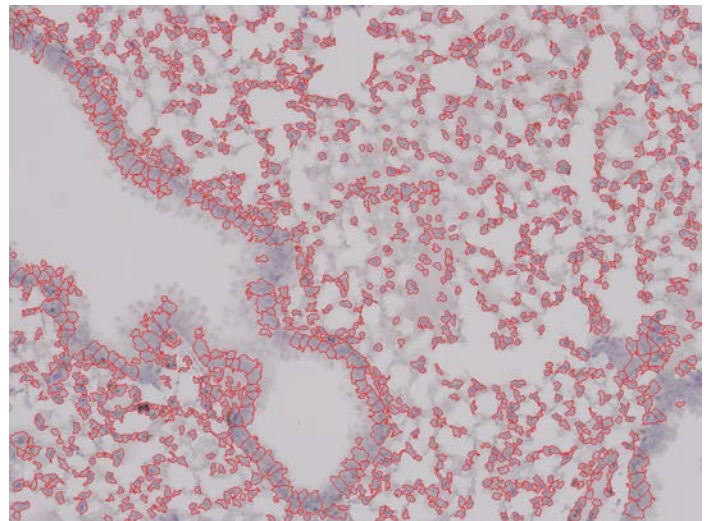

1175 nucleated cells

Supplementary Figure 11  
Page 3/30

MIT-T-COVID Lung 2-1  
Unchallenged, Female Cohort

CD8<sup>+</sup>/CD4<sup>+</sup> Cell Annotations

Nucleated Cell Annotations

CD8<sup>+</sup>

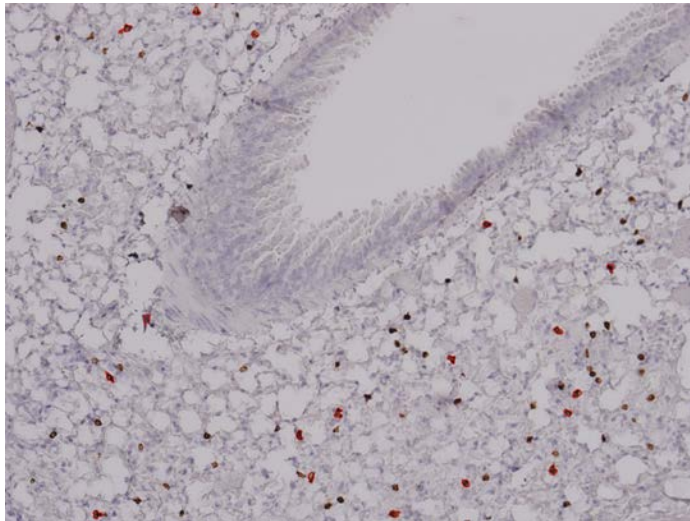

18 CD8<sup>+</sup> cells

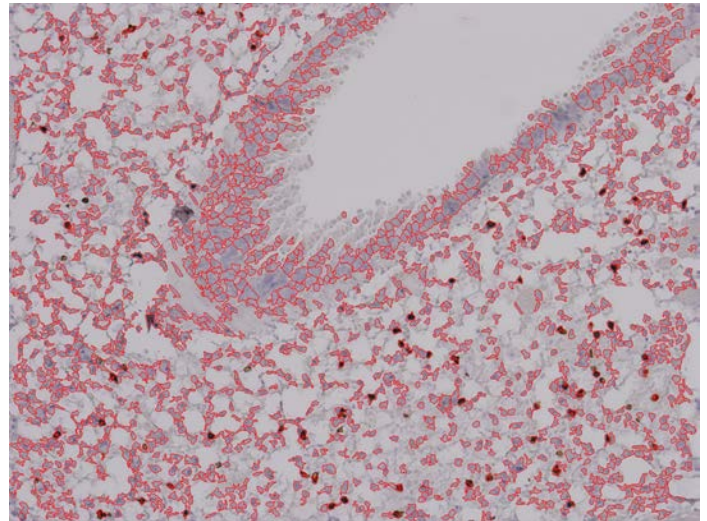

1481 nucleated cells

CD4<sup>+</sup>

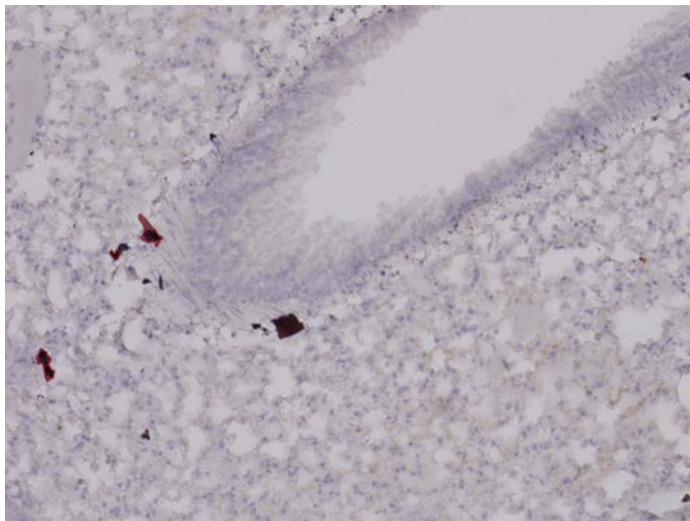

4 CD4<sup>+</sup> cells

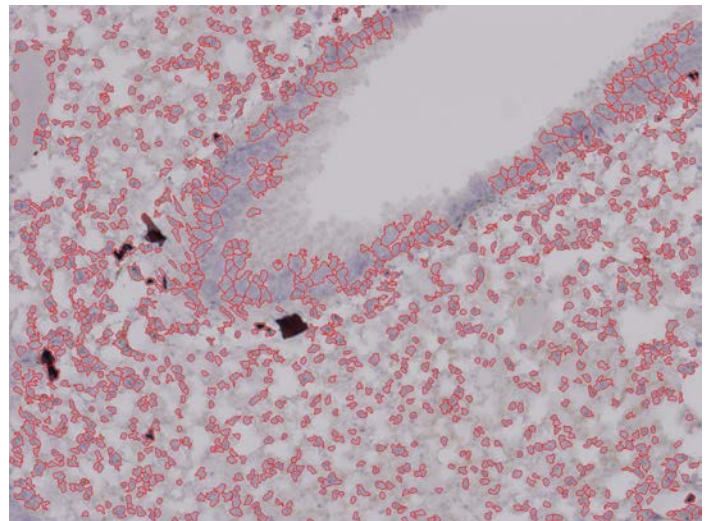

1190 nucleated cells

Supplementary Figure 11  
Page 4/30

MIT-T-COVID Lung 2-2  
Unchallenged, Female Cohort

CD8<sup>+</sup>/CD4<sup>+</sup> Cell Annotations

Nucleated Cell Annotations

CD8<sup>+</sup>

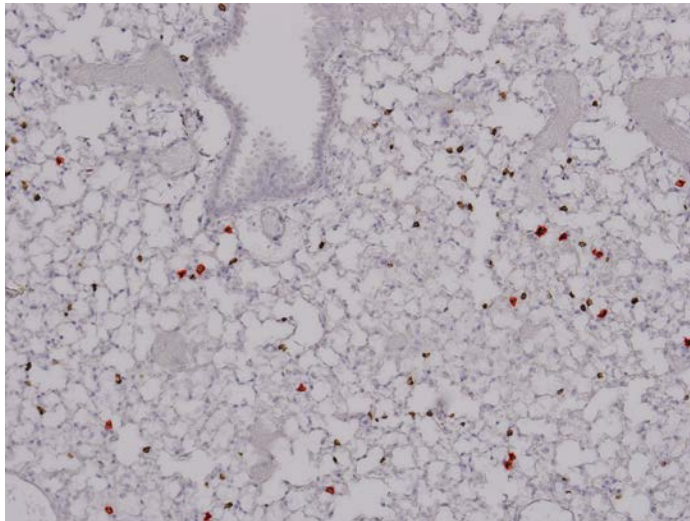

18 CD8<sup>+</sup> cells

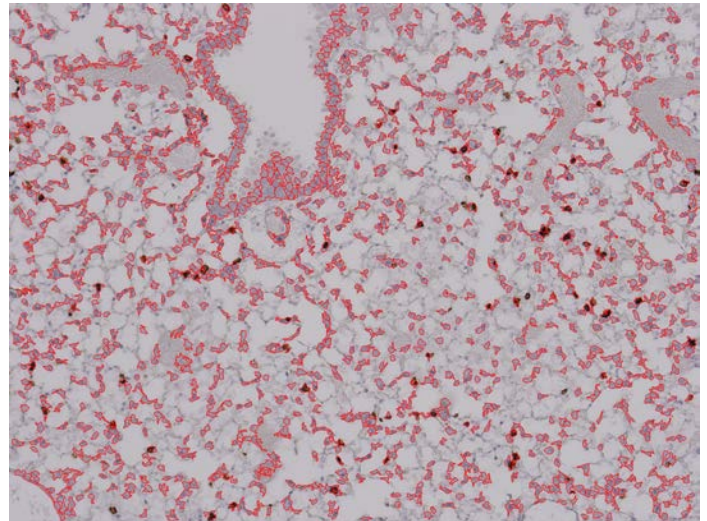

1291 nucleated cells

CD4<sup>+</sup>

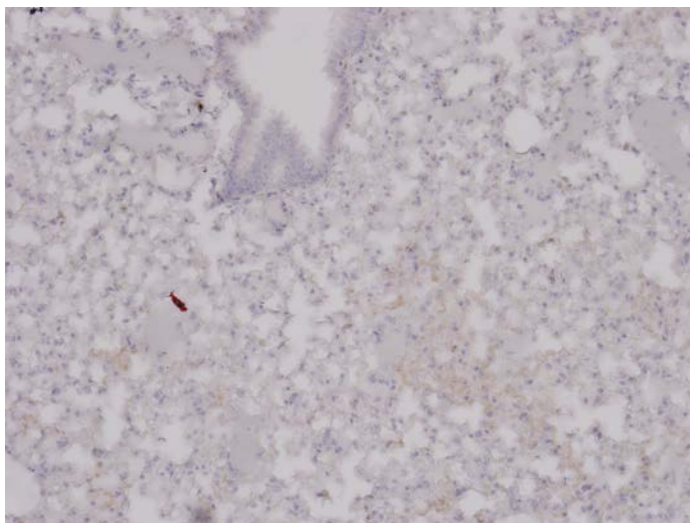

1 CD4<sup>+</sup> cells

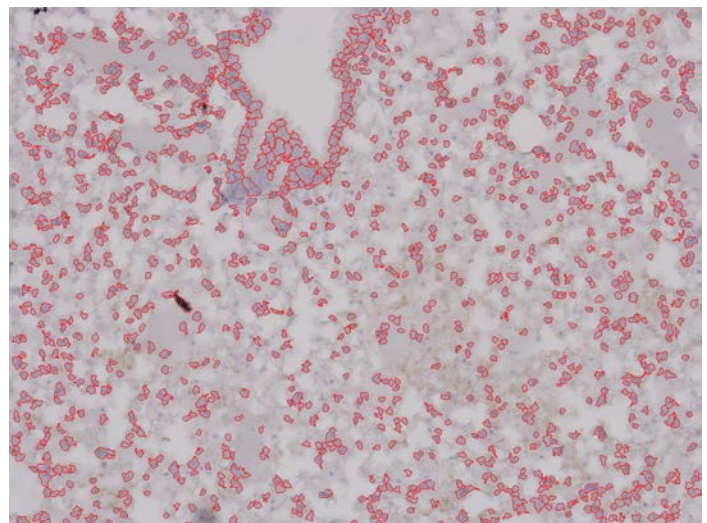

1132 nucleated cells

MIT-T-COVID Lung 2-3  
Unchallenged, Female Cohort

CD8<sup>+</sup>/CD4<sup>+</sup> Cell Annotations

Nucleated Cell Annotations

CD8<sup>+</sup>

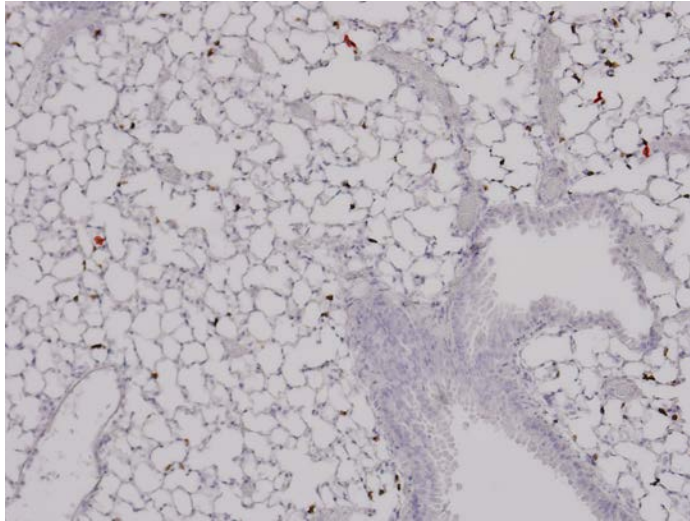

4 CD8<sup>+</sup> cells

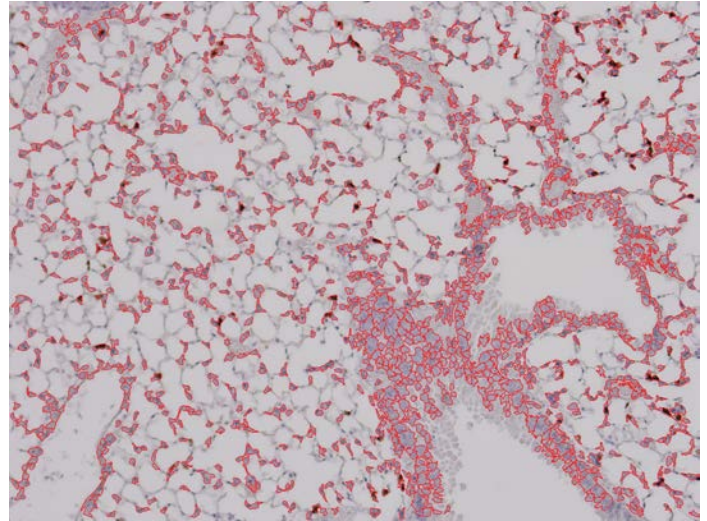

1284 nucleated cells

CD4<sup>+</sup>

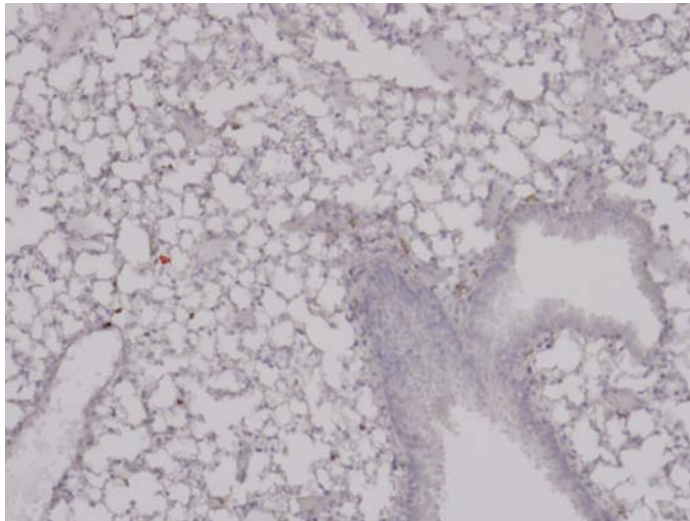

1 CD4<sup>+</sup> cells

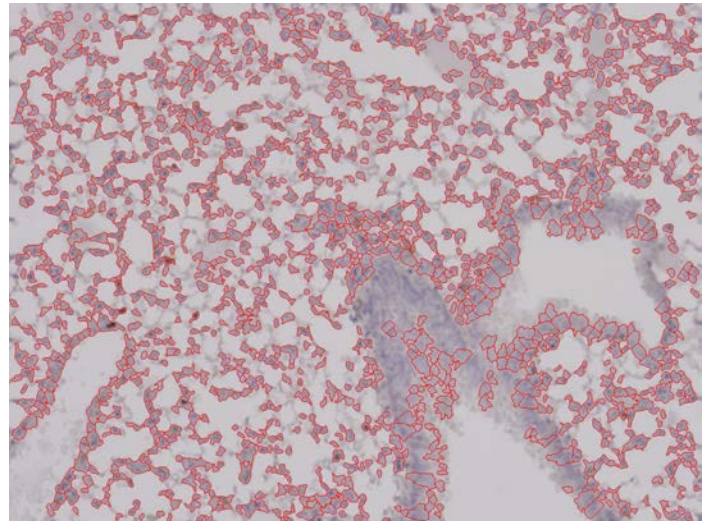

1368 nucleated cells

MIT-T-COVID Lung 2-4  
Unchallenged, Female Cohort

CD8<sup>+</sup>/CD4<sup>+</sup> Cell Annotations

Nucleated Cell Annotations

CD8<sup>+</sup>

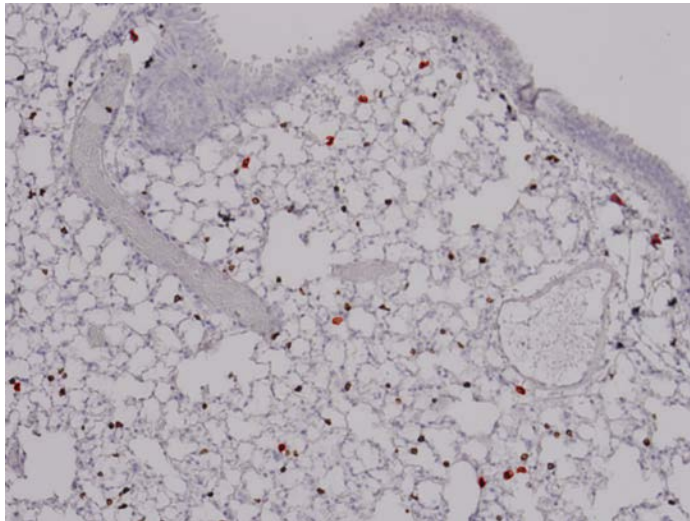

14 CD8<sup>+</sup> cells

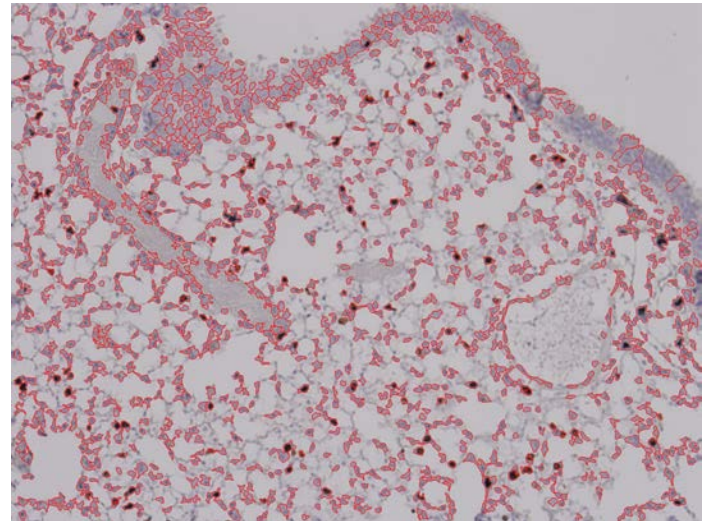

1328 nucleated cells

CD4<sup>+</sup>

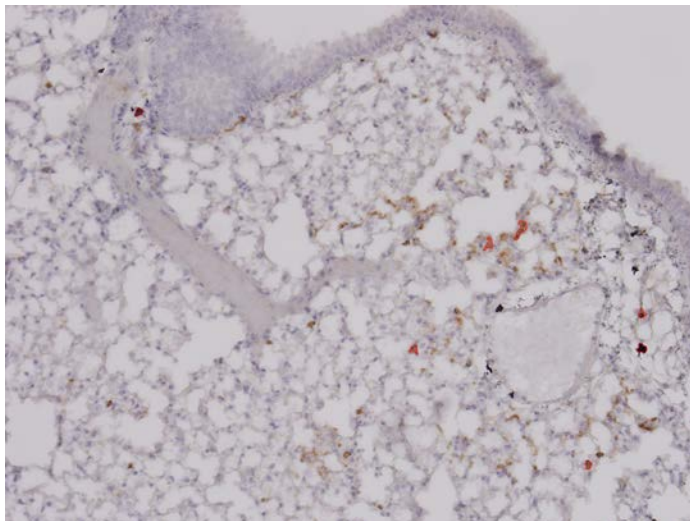

7 CD4<sup>+</sup> cells

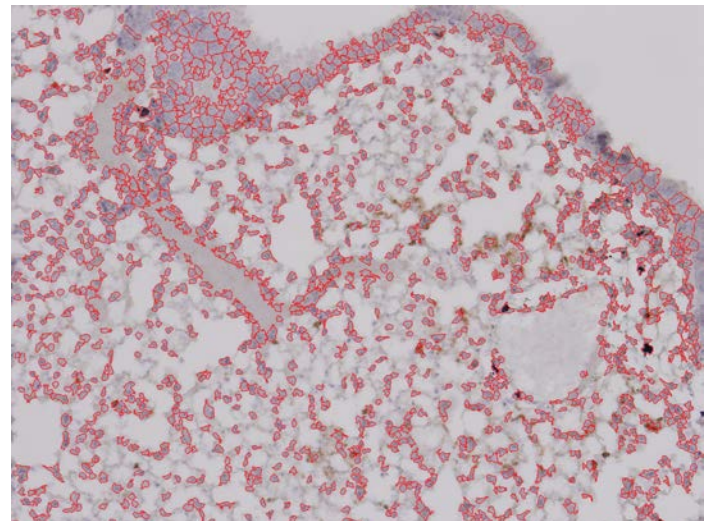

1297 nucleated cells

Supplementary Figure 11  
Page 7/30

MIT-T-COVID Lung 3-1  
Unchallenged, Female Cohort

CD8<sup>+</sup>/CD4<sup>+</sup> Cell Annotations

Nucleated Cell Annotations

CD8<sup>+</sup>

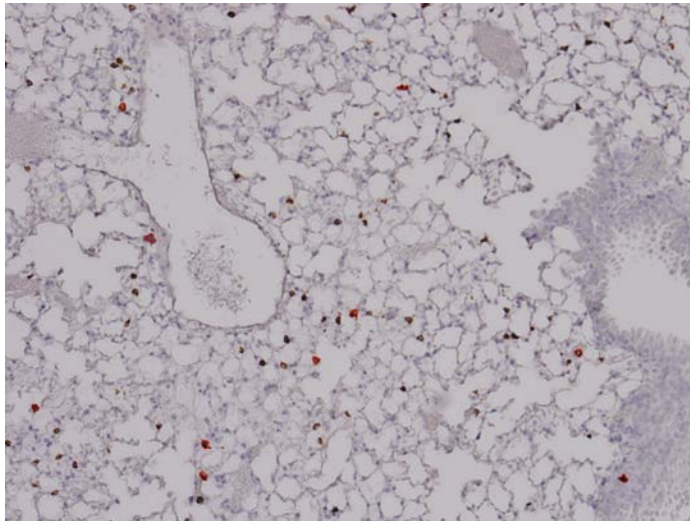

10 CD8<sup>+</sup> cells

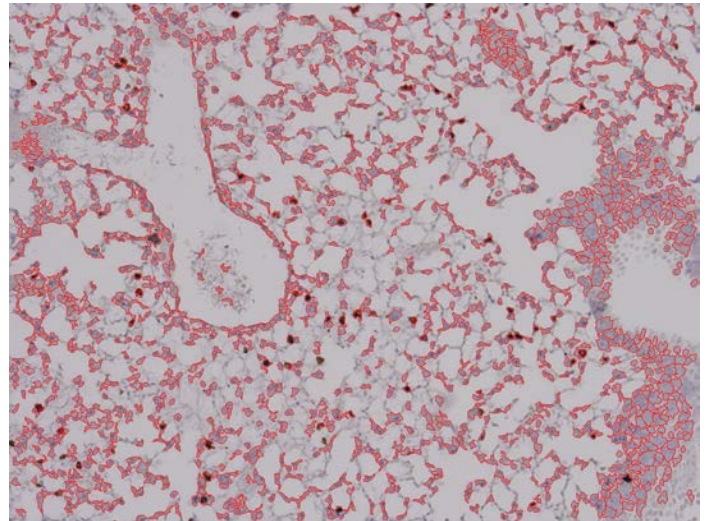

1458 nucleated cells

CD4<sup>+</sup>

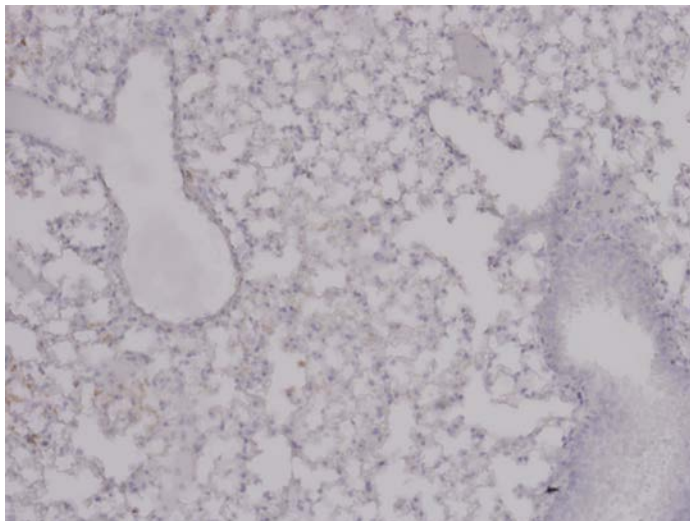

0 CD4<sup>+</sup> cells

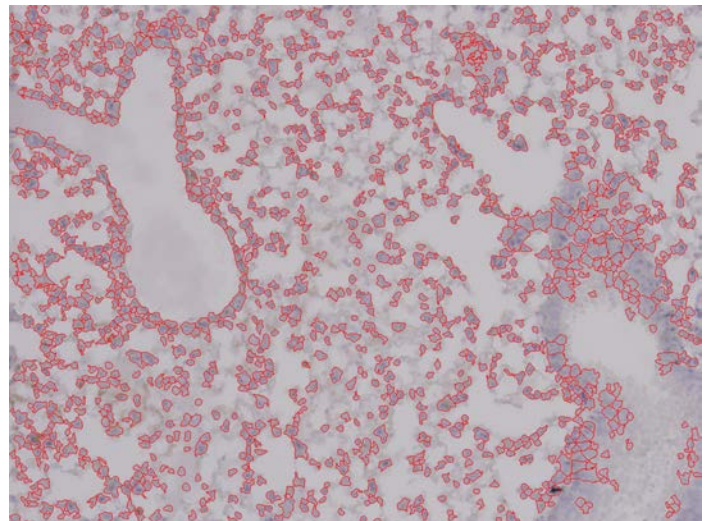

1272 nucleated cells

MIT-T-COVID Lung 3-2  
Unchallenged, Female Cohort

CD8<sup>+</sup>/CD4<sup>+</sup> Cell Annotations

Nucleated Cell Annotations

CD8<sup>+</sup>

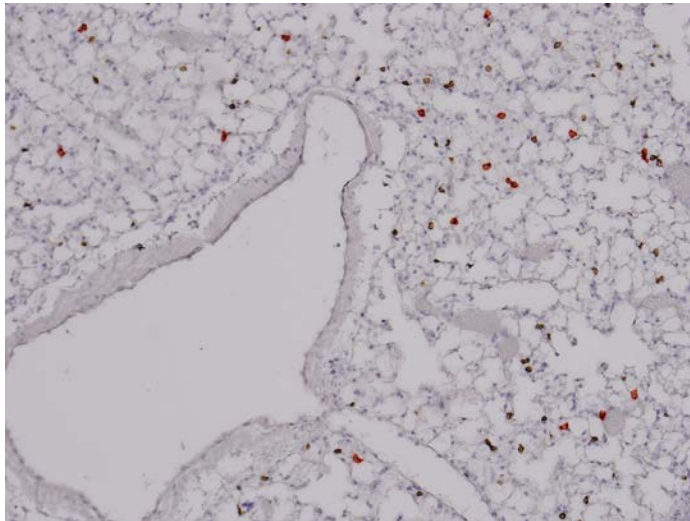

16 CD8<sup>+</sup> cells

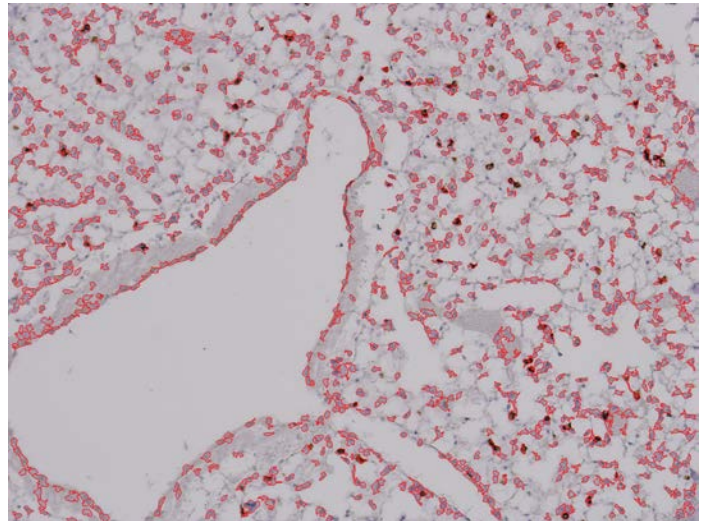

951 nucleated cells

CD4<sup>+</sup>

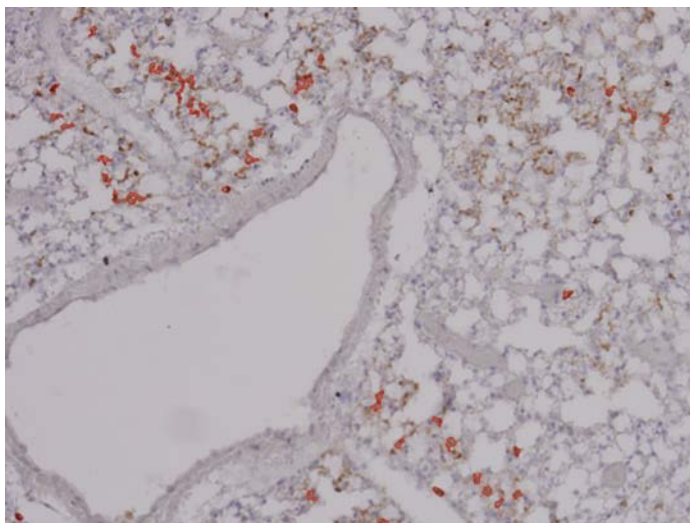

46 CD4<sup>+</sup> cells

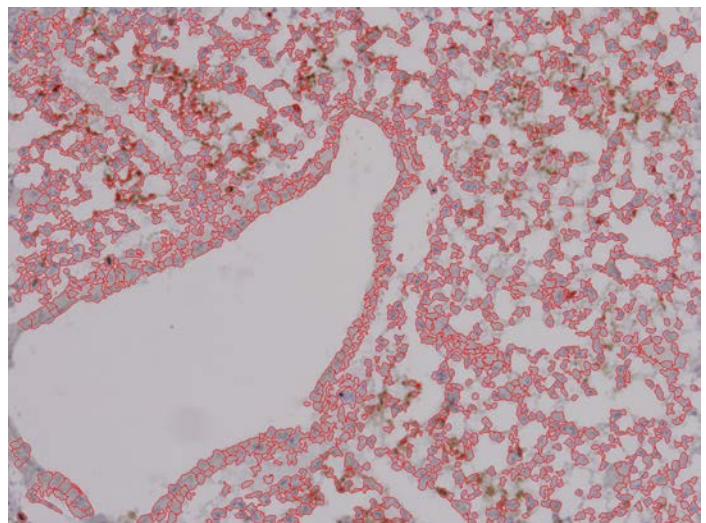

1484 nucleated cells



MIT-T-COVID Lung 3-3  
Unchallenged, Female Cohort

CD8<sup>+</sup>/CD4<sup>+</sup> Cell Annotations

Nucleated Cell Annotations

CD8<sup>+</sup>

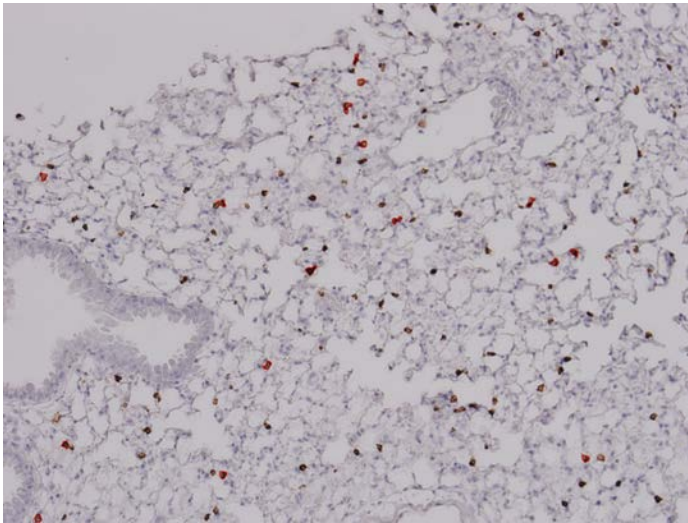

16 CD8<sup>+</sup> cells

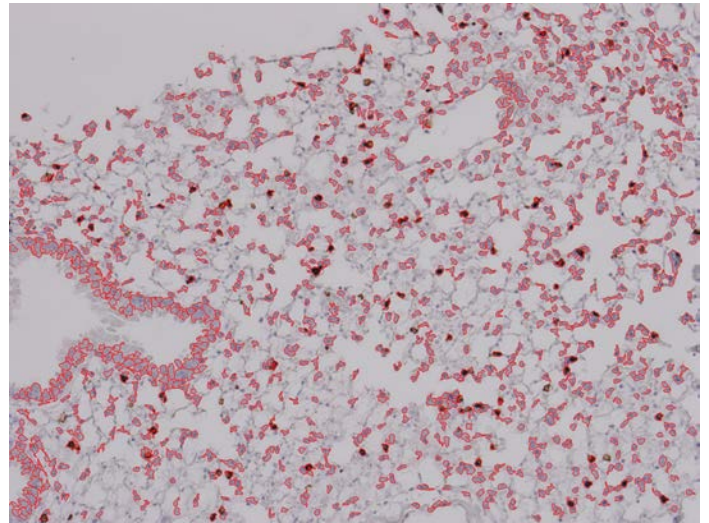

1115 nucleated cells

CD4<sup>+</sup>

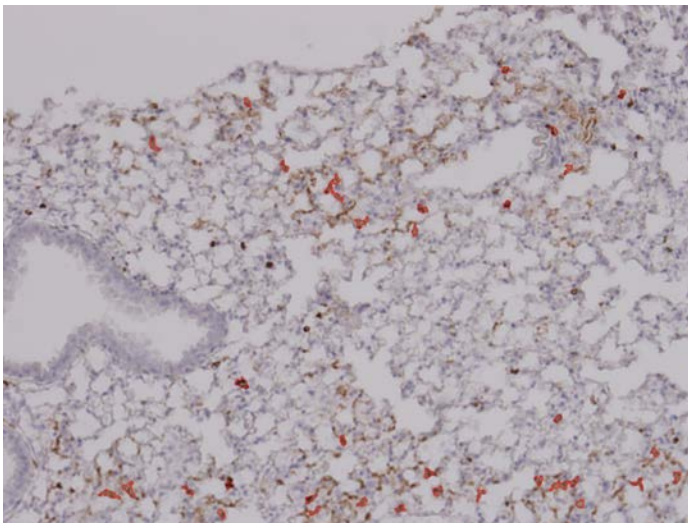

37 CD4<sup>+</sup> cells

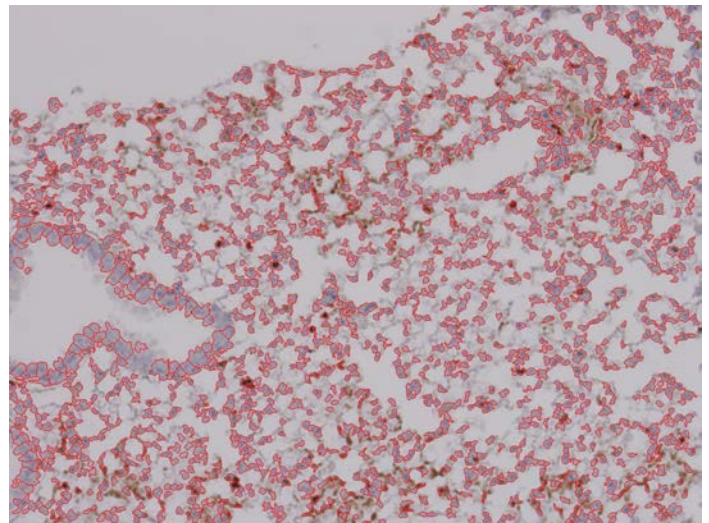

1499 nucleated cells

MIT-T-COVID Lung 3-4  
Unchallenged, Female Cohort

CD8<sup>+</sup>/CD4<sup>+</sup> Cell Annotations

Nucleated Cell Annotations

CD8<sup>+</sup>

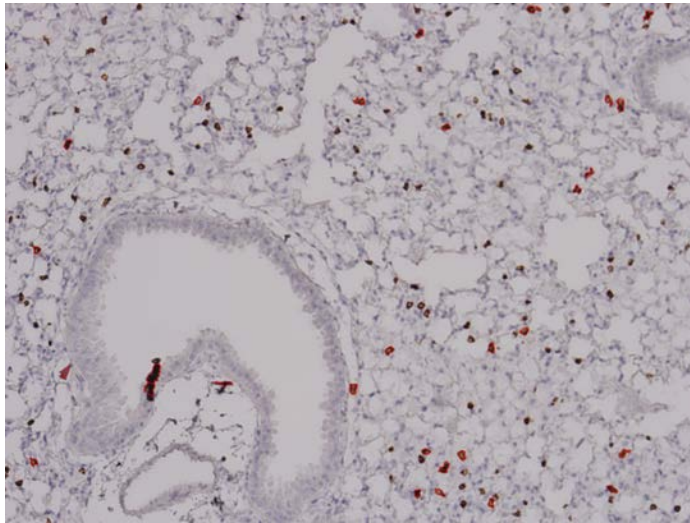

29 CD8<sup>+</sup> cells

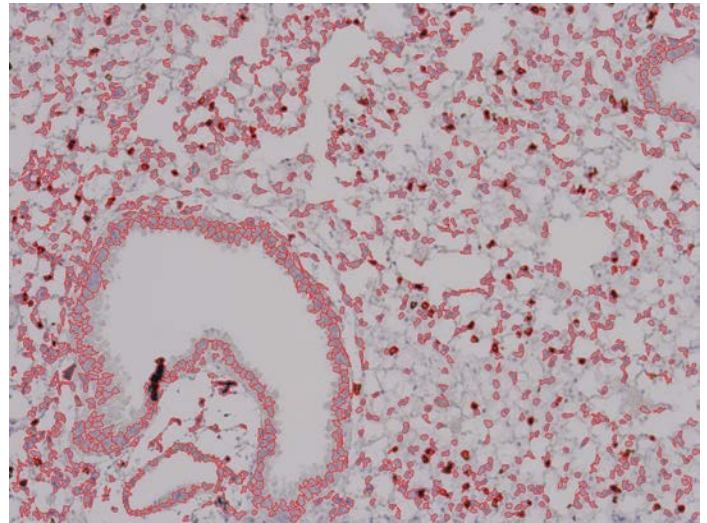

1303 nucleated cells

CD4<sup>+</sup>

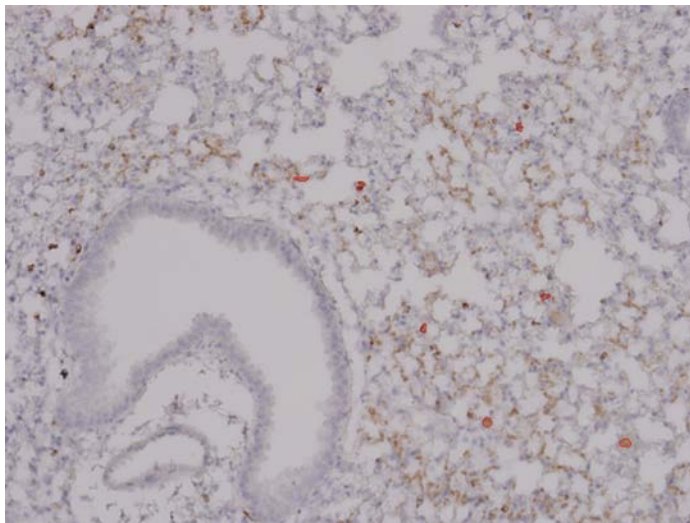

7 CD4<sup>+</sup> cells

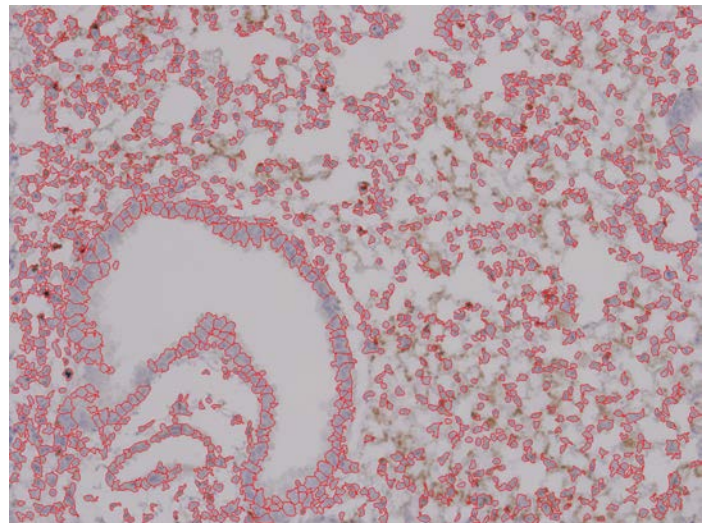

1412 nucleated cells

Pfizer/BNT Lung 1-1  
Unchallenged, Female Cohort

CD8<sup>+</sup>/CD4<sup>+</sup> Cell Annotations

Nucleated Cell Annotations

CD8<sup>+</sup>

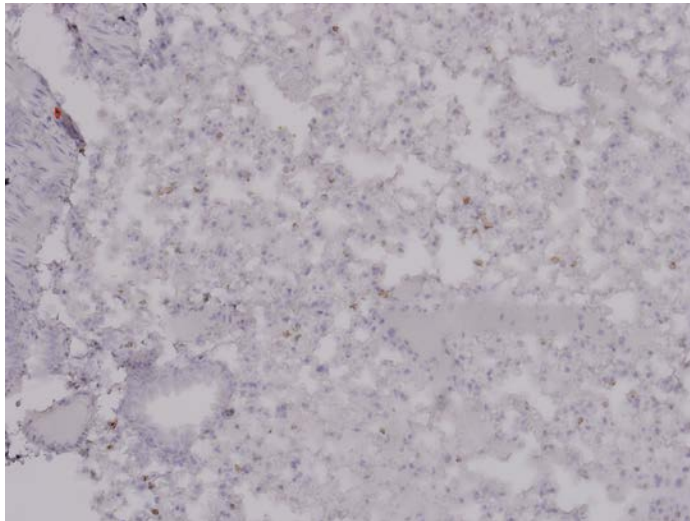

1 CD8<sup>+</sup> cells

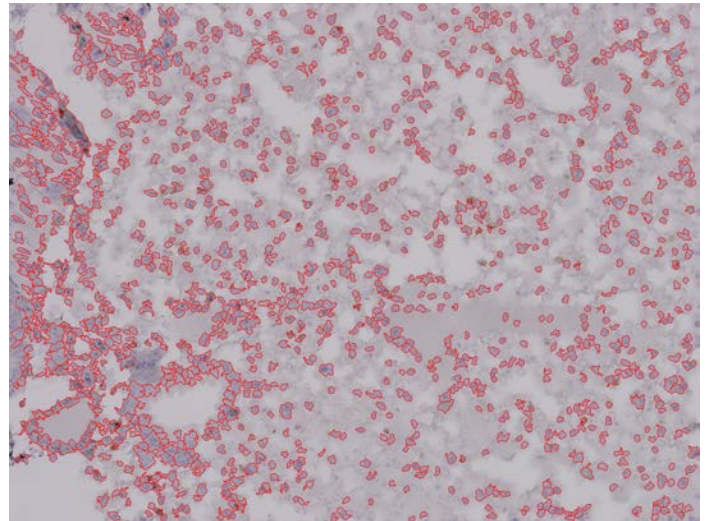

1198 nucleated cells

CD4<sup>+</sup>

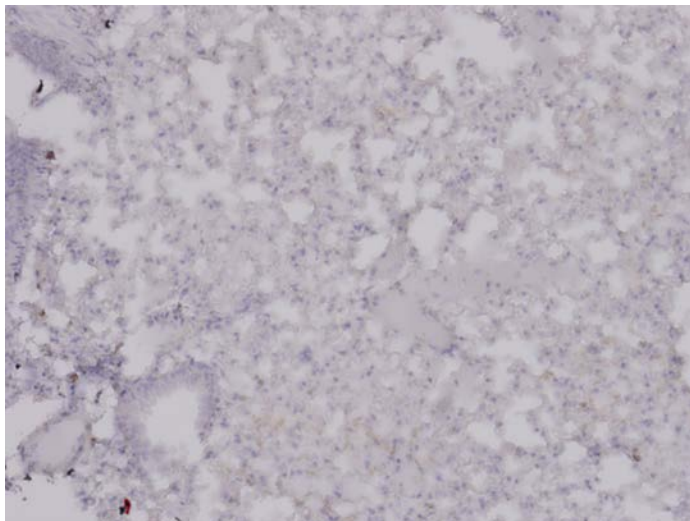

1 CD4<sup>+</sup> cells

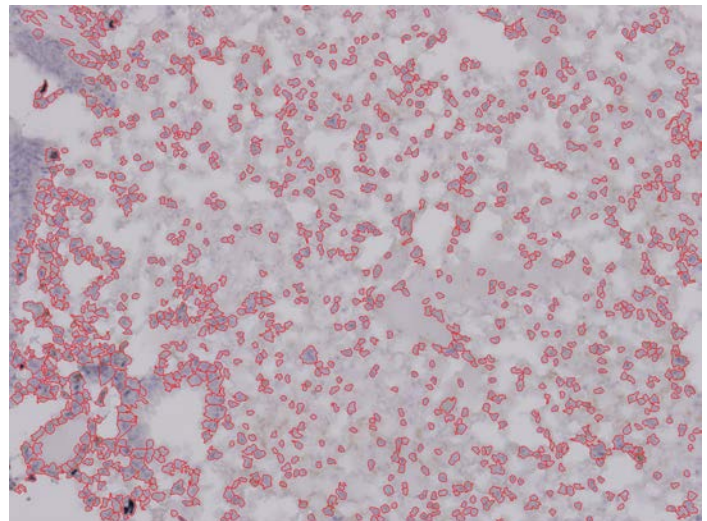

1125 nucleated cells

Pfizer/BNT Lung 1-2  
Unchallenged, Female Cohort

CD8<sup>+</sup>/CD4<sup>+</sup> Cell Annotations

Nucleated Cell Annotations

CD8<sup>+</sup>

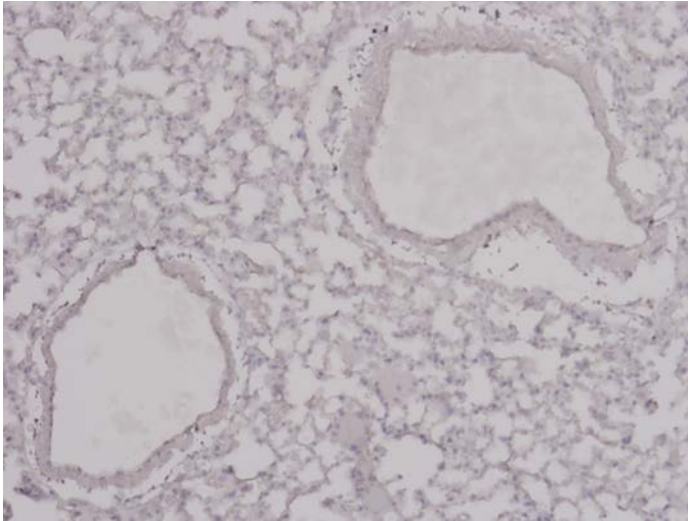

0 CD8<sup>+</sup> cells

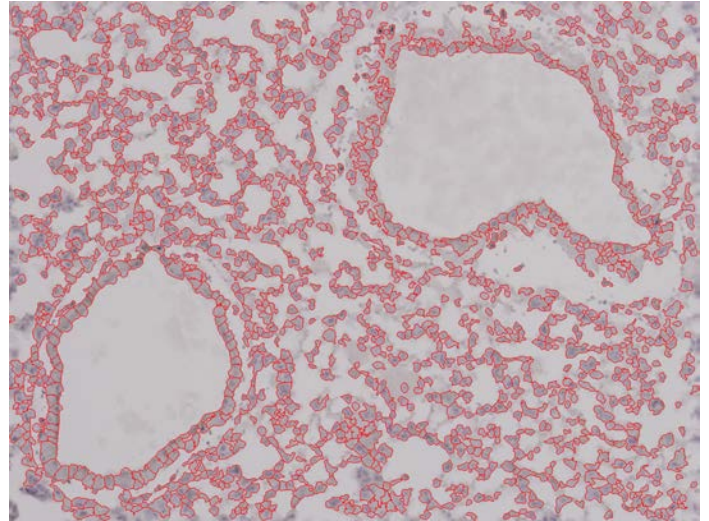

1396 nucleated cells

CD4<sup>+</sup>

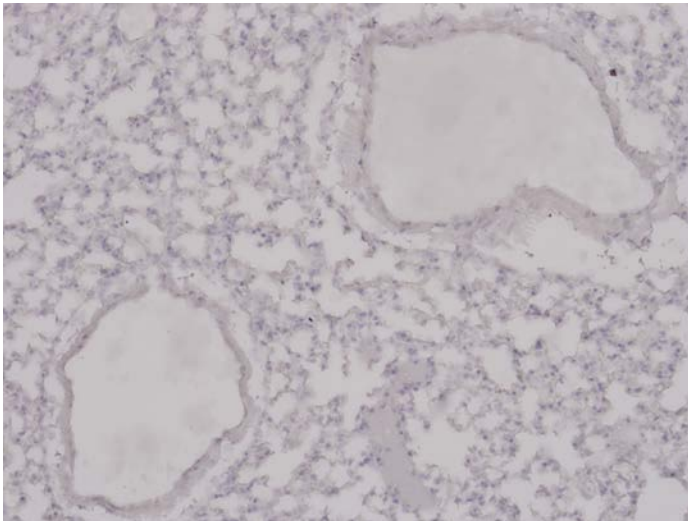

0 CD4<sup>+</sup> cells

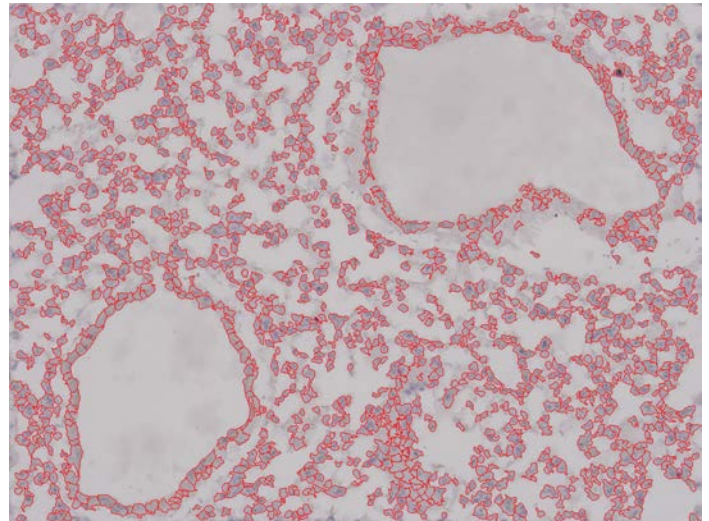

1355 nucleated cells

Supplementary Figure 11  
Page 13/30

Pfizer/BNT Lung 2-1  
Unchallenged, Female Cohort

CD8<sup>+</sup>/CD4<sup>+</sup> Cell Annotations

Nucleated Cell Annotations

CD8<sup>+</sup>

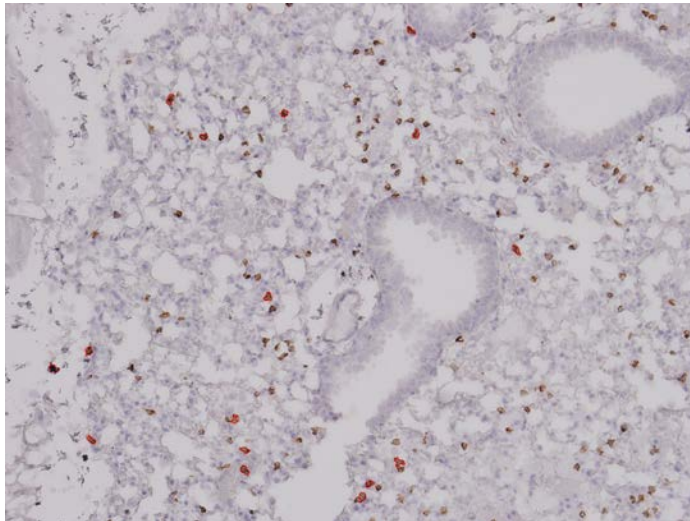

16 CD8<sup>+</sup> cells

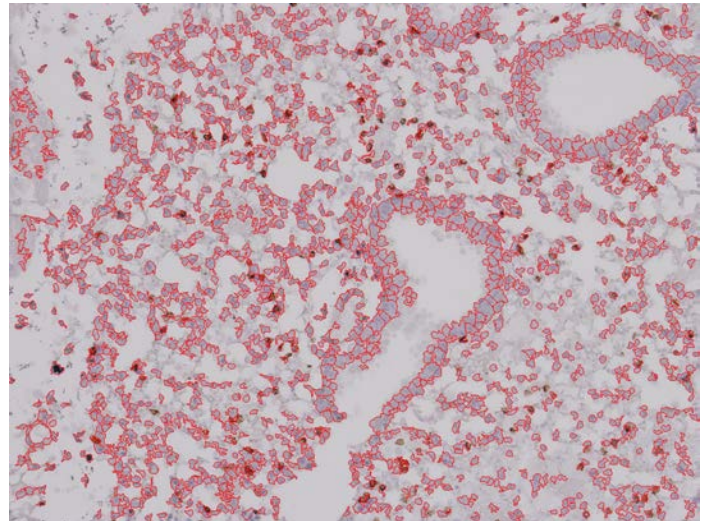

1544 nucleated cells

CD4<sup>+</sup>

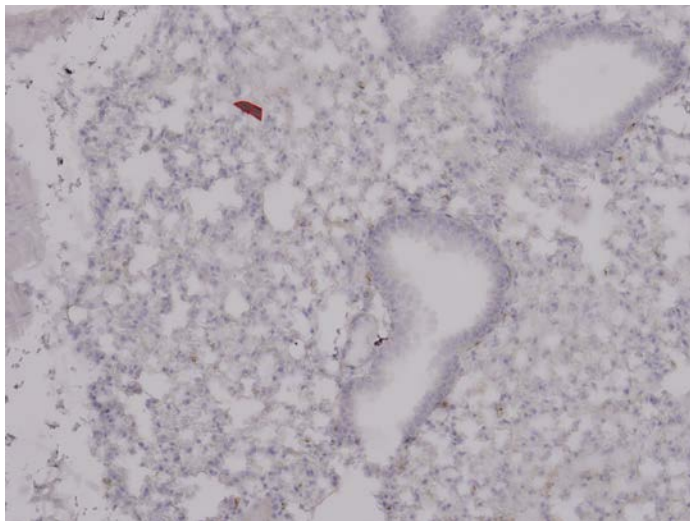

2 CD4<sup>+</sup> cells

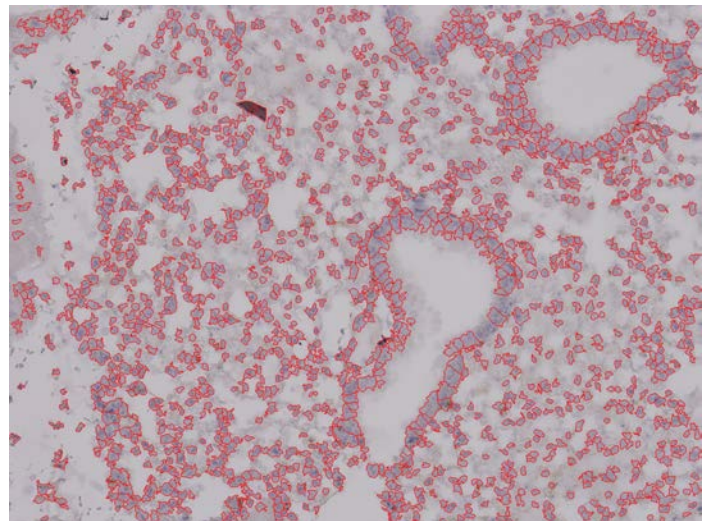

1447 nucleated cells

Pfizer/BNT Lung 2-2  
Unchallenged, Female Cohort

CD8<sup>+</sup>/CD4<sup>+</sup> Cell Annotations

Nucleated Cell Annotations

CD8<sup>+</sup>

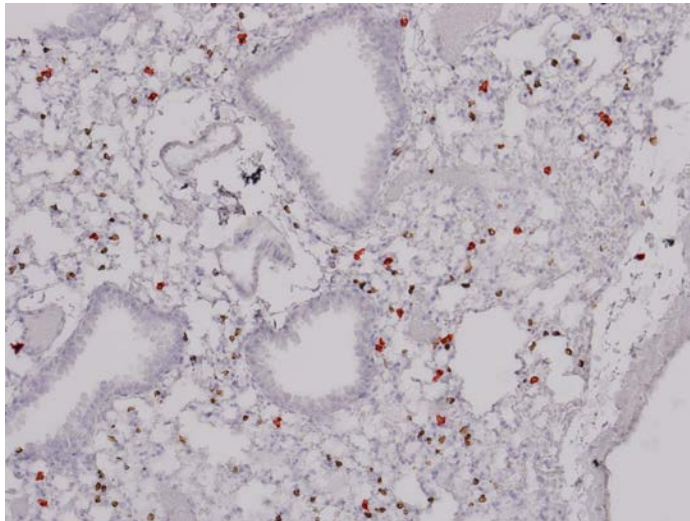

26 CD8<sup>+</sup> cells

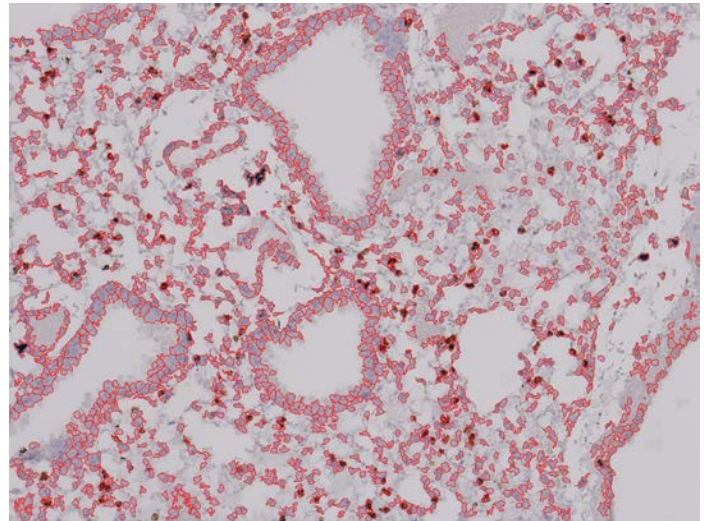

1475 nucleated cells

CD4<sup>+</sup>

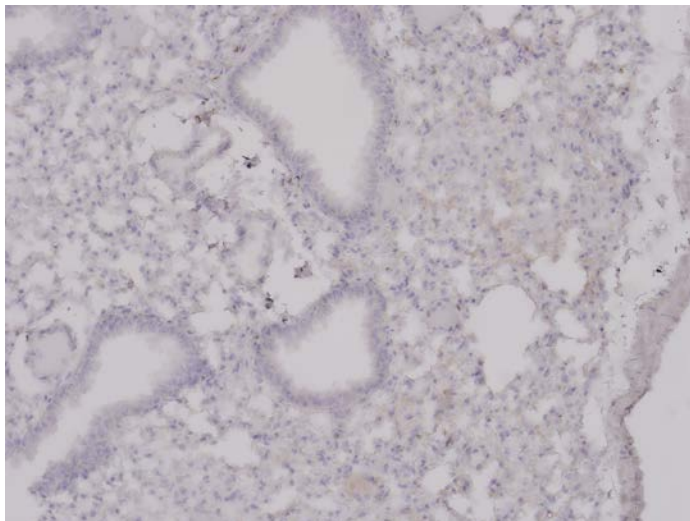

0 CD4<sup>+</sup> cells

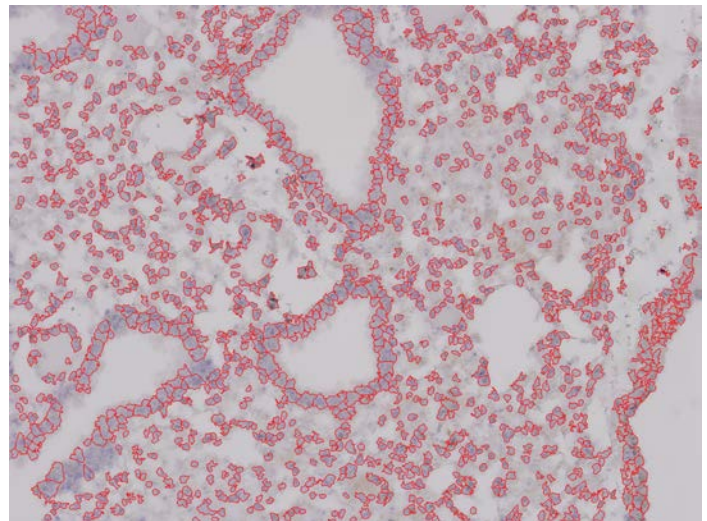

1376 nucleated cells

Supplementary Figure 11  
Page 15/30

Pfizer/BNT Lung 2-3  
Unchallenged, Female Cohort

CD8<sup>+</sup>/CD4<sup>+</sup> Cell Annotations

Nucleated Cell Annotations

CD8<sup>+</sup>

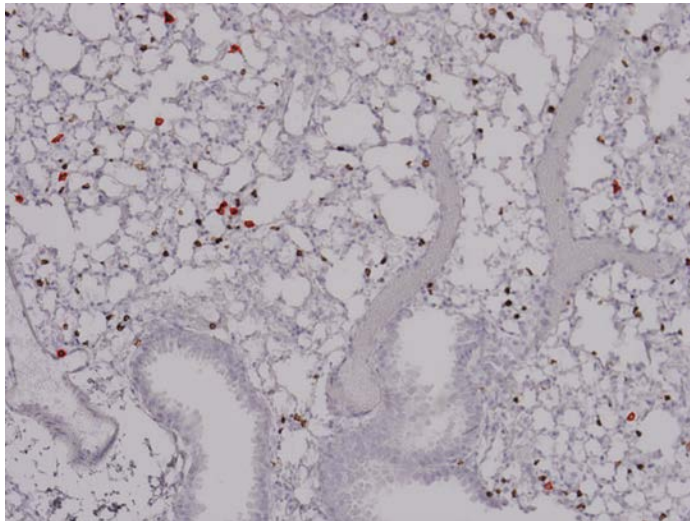

13 CD8<sup>+</sup> cells

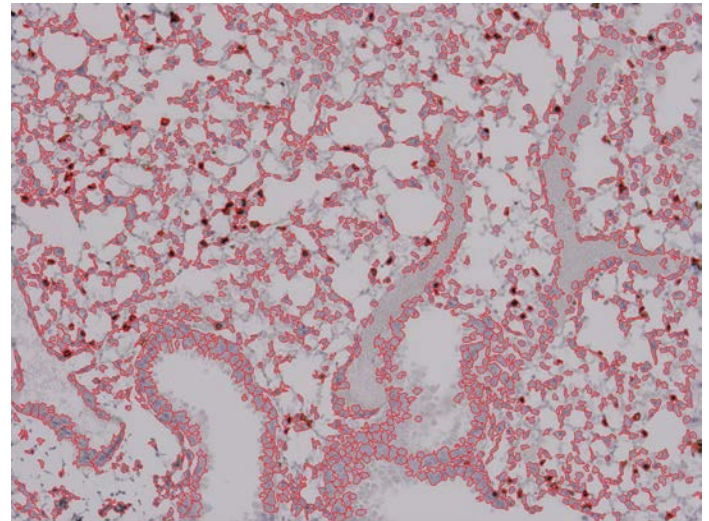

1582 nucleated cells

CD4<sup>+</sup>

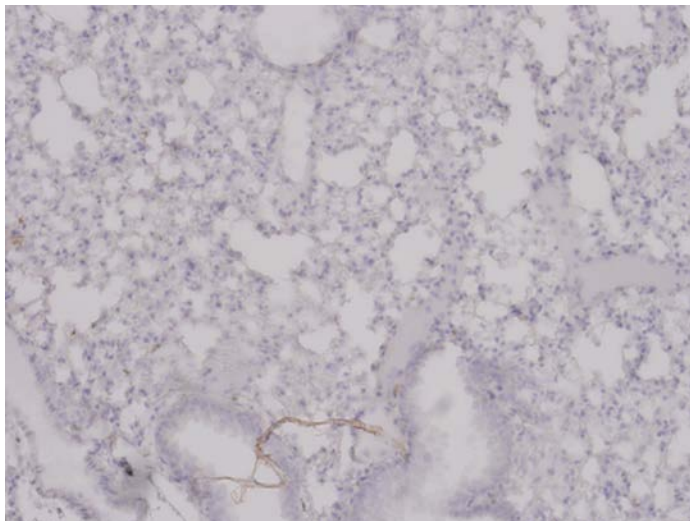

0 CD4<sup>+</sup> cells

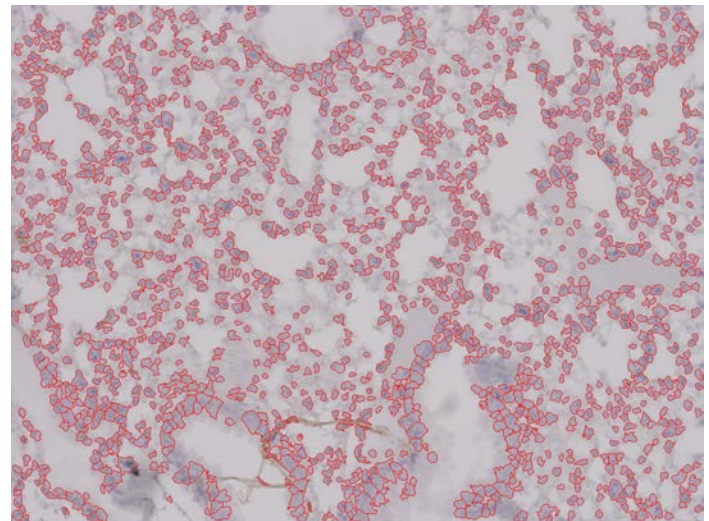

1440 nucleated cells

Pfizer/BNT Lung 2-4  
Unchallenged, Female Cohort

CD8<sup>+</sup>/CD4<sup>+</sup> Cell Annotations

Nucleated Cell Annotations

CD8<sup>+</sup>

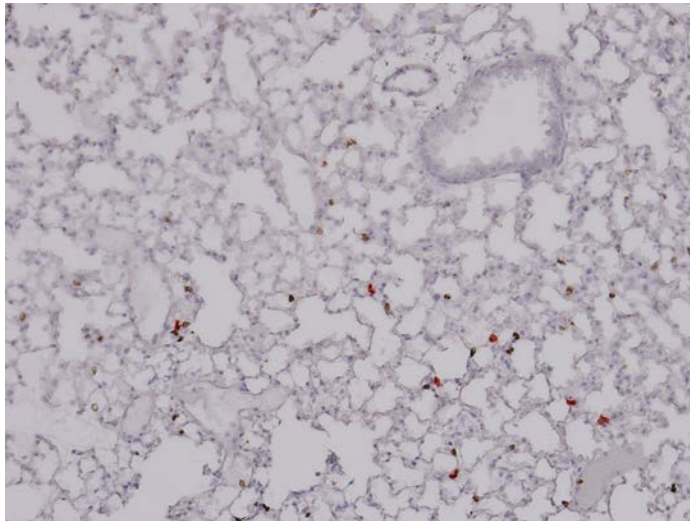

7 CD8<sup>+</sup> cells

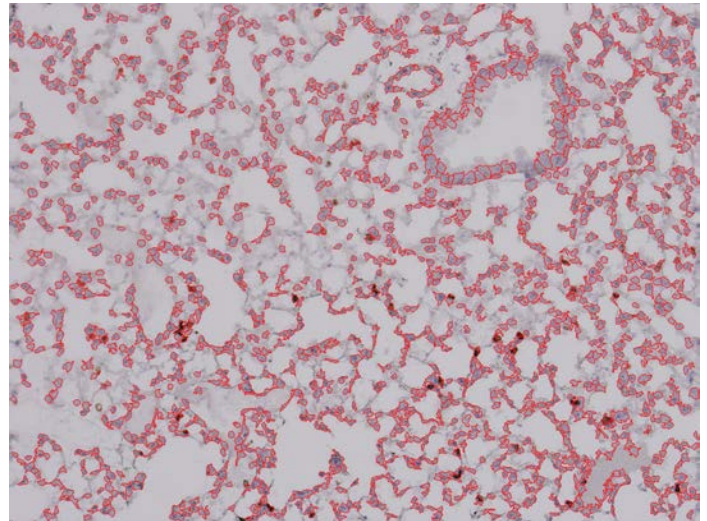

1389 nucleated cells

CD4<sup>+</sup>

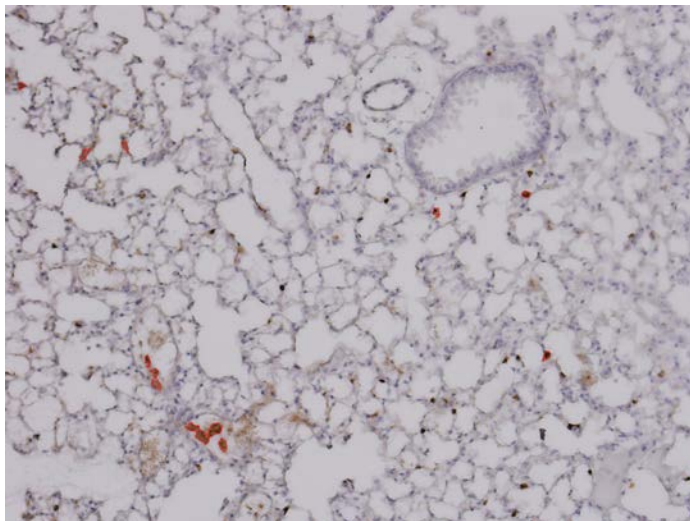

13 CD4<sup>+</sup> cells

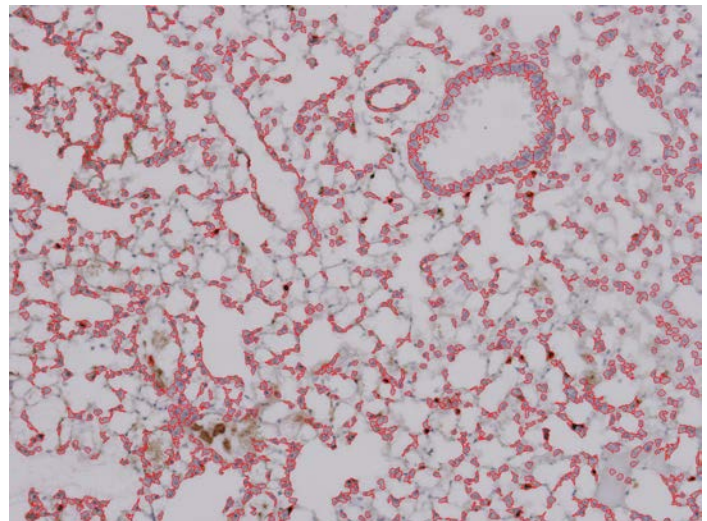

1197 nucleated cells



Pfizer/BNT Lung 3-1  
Unchallenged, Female Cohort

CD8<sup>+</sup>/CD4<sup>+</sup> Cell Annotations

Nucleated Cell Annotations

CD8<sup>+</sup>

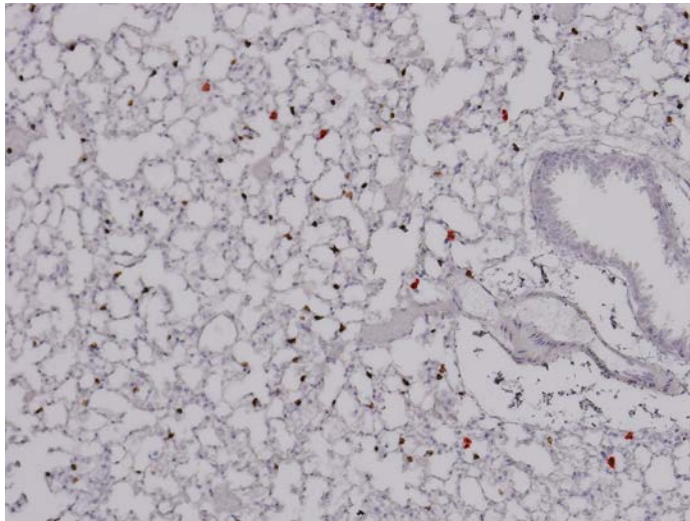

9 CD8<sup>+</sup> cells

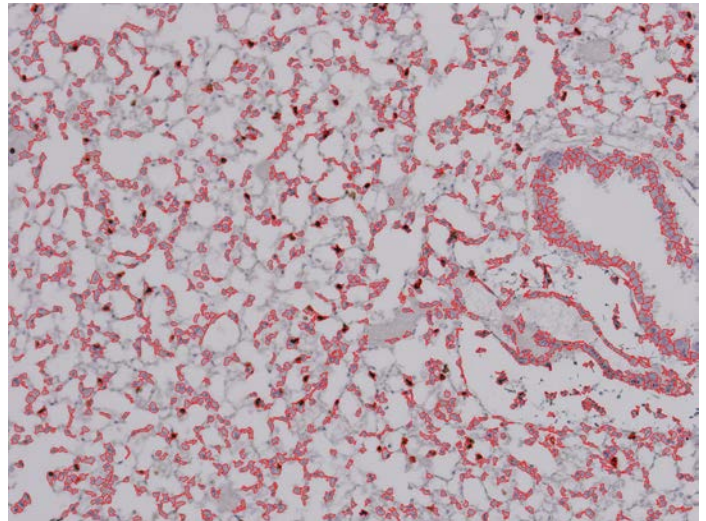

1232 nucleated cells

CD4<sup>+</sup>

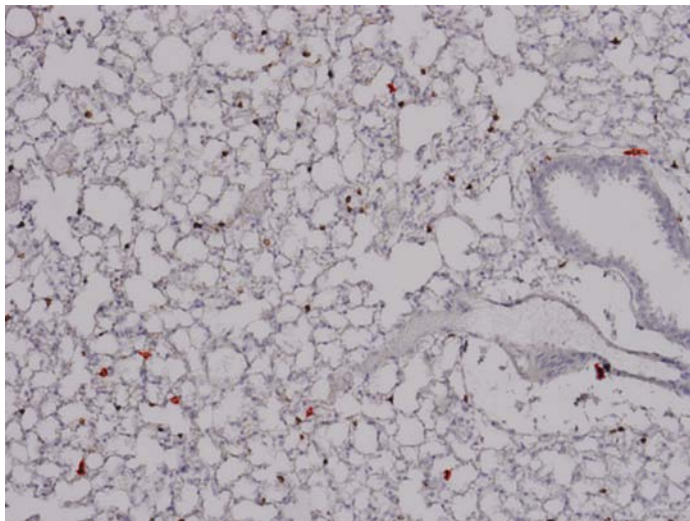

9 CD4<sup>+</sup> cells

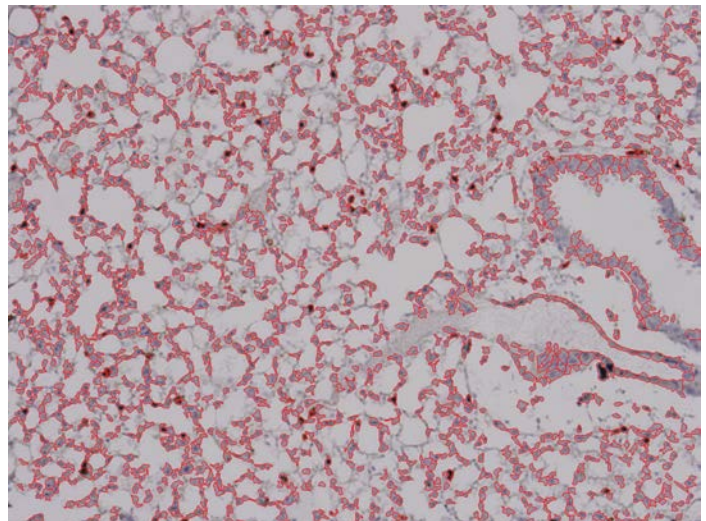

1521 nucleated cells

Pfizer/BNT Lung 3-2  
Unchallenged, Female Cohort

CD8<sup>+</sup>/CD4<sup>+</sup> Cell Annotations

Nucleated Cell Annotations

CD8<sup>+</sup>

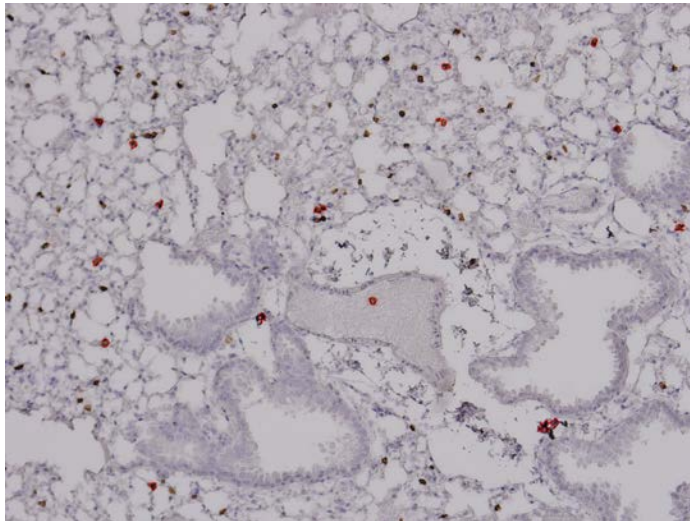

16 CD8<sup>+</sup> cells

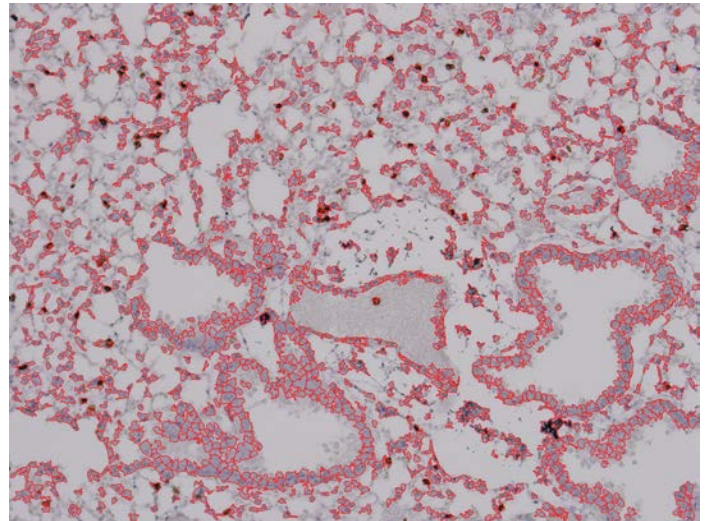

1499 nucleated cells

CD4<sup>+</sup>

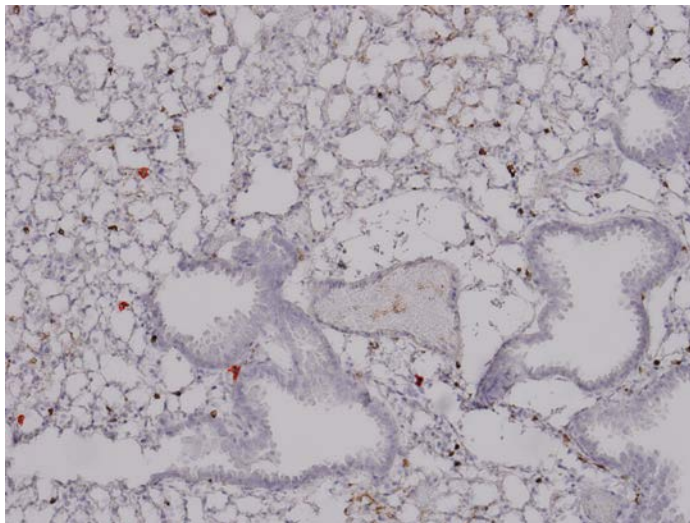

5 CD4<sup>+</sup> cells

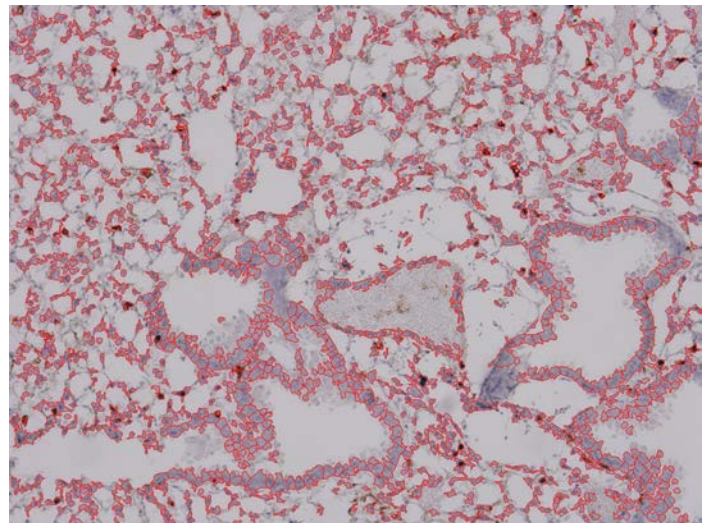

1464 nucleated cells

Pfizer/BNT Lung 3-3  
Unchallenged, Female Cohort

CD8<sup>+</sup>/CD4<sup>+</sup> Cell Annotations

Nucleated Cell Annotations

CD8<sup>+</sup>

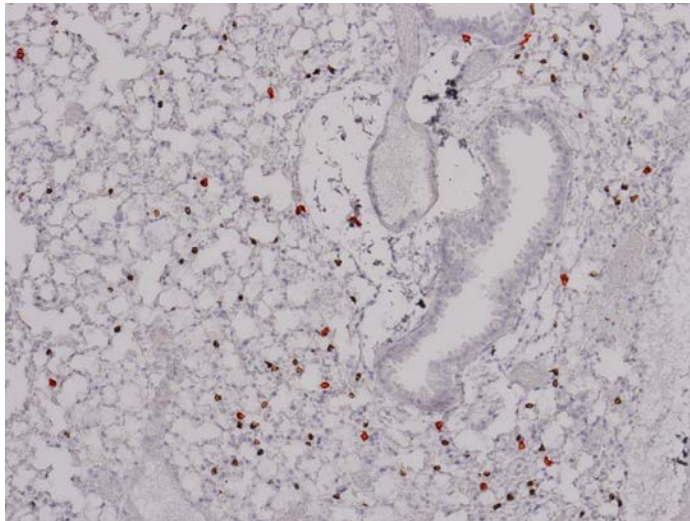

18 CD8<sup>+</sup> cells

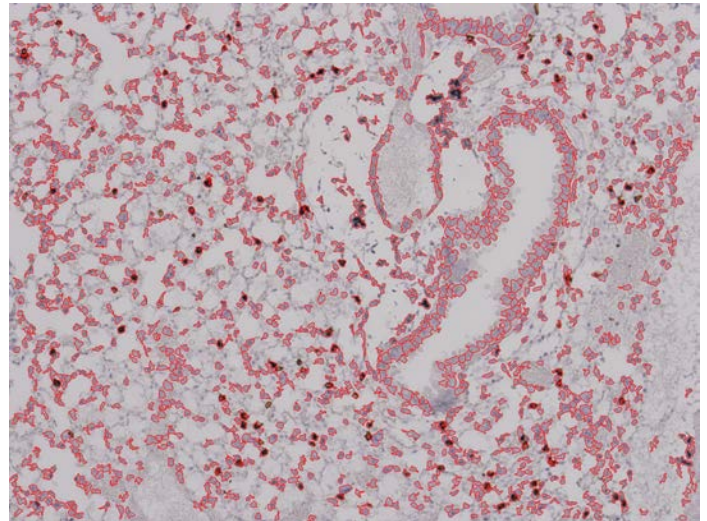

1365 nucleated cells

CD4<sup>+</sup>

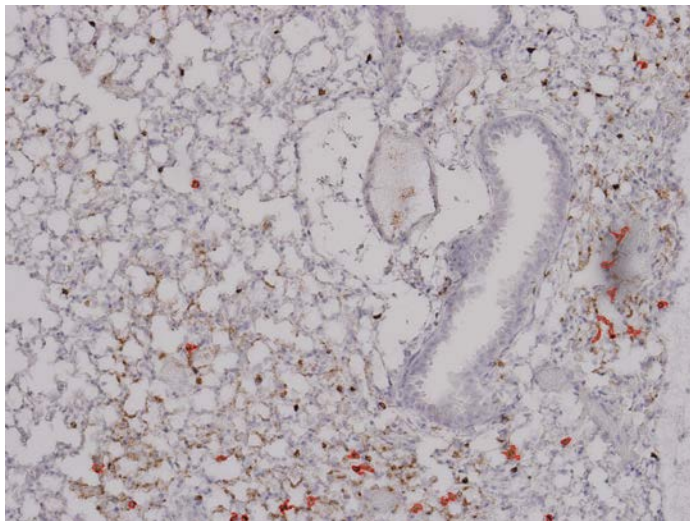

28 CD4<sup>+</sup> cells

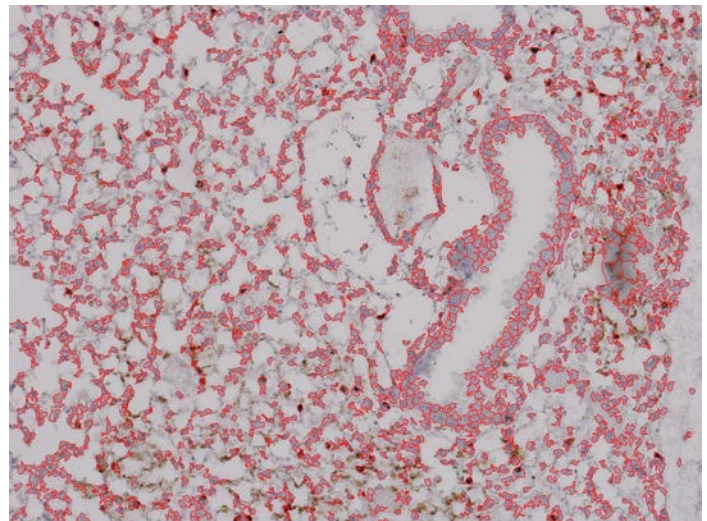

1541 nucleated cells

Pfizer/BNT Lung 3-4  
Unchallenged, Female Cohort

CD8<sup>+</sup>/CD4<sup>+</sup> Cell Annotations

Nucleated Cell Annotations

CD8<sup>+</sup>

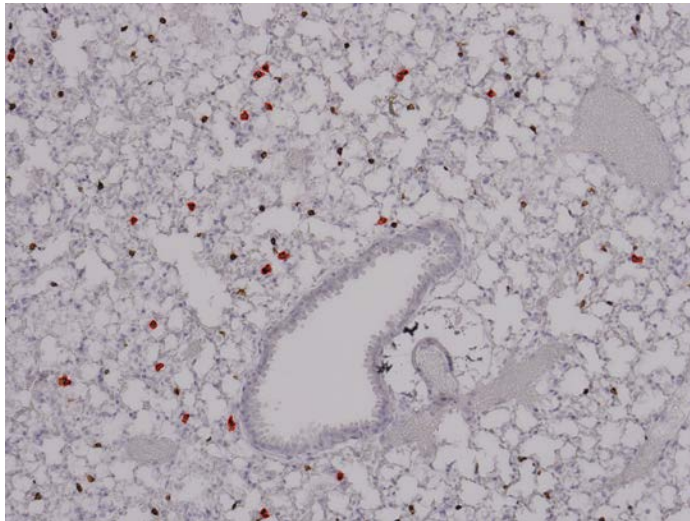

20 CD8<sup>+</sup> cells

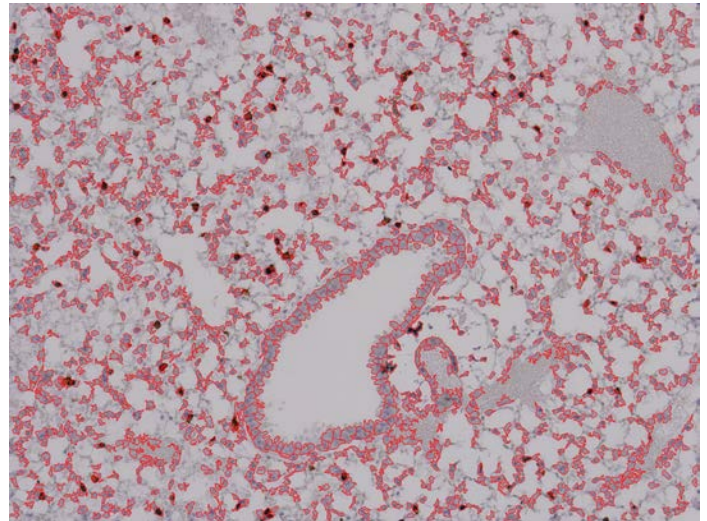

1464 nucleated cells

CD4<sup>+</sup>

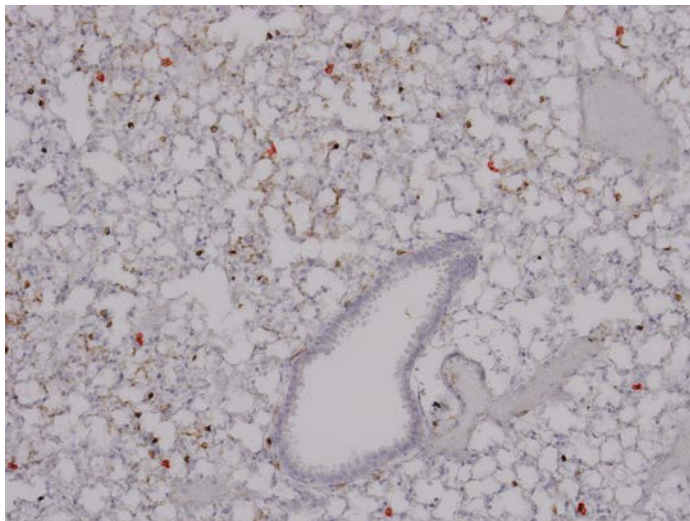

13 CD4<sup>+</sup> cells

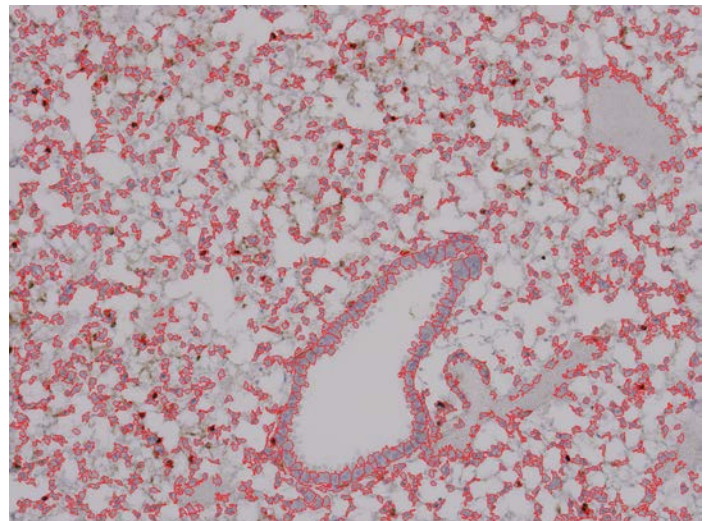

1400 nucleated cells

Supplementary Figure 11  
Page 21/30

PBS Lung 1-1  
Unchallenged, Female Cohort

CD8<sup>+</sup>/CD4<sup>+</sup> Cell Annotations

Nucleated Cell Annotations

CD8<sup>+</sup>

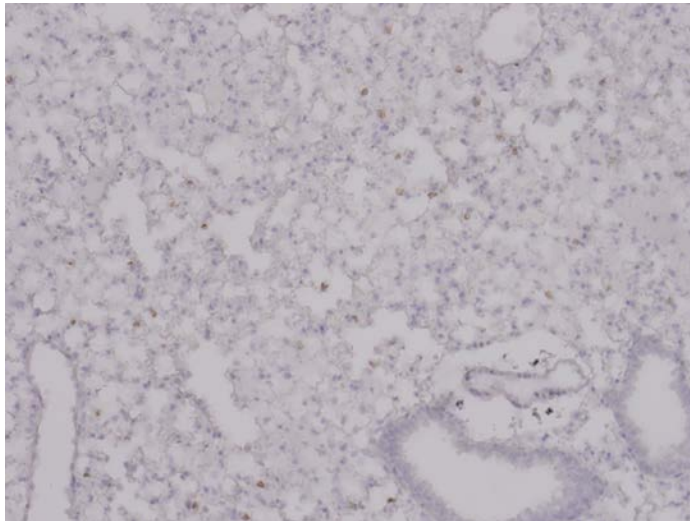

0 CD8<sup>+</sup> cells

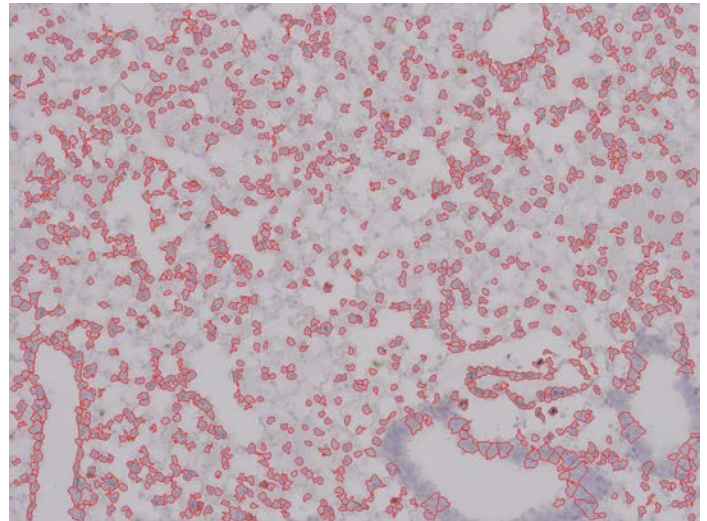

1136 nucleated cells

CD4<sup>+</sup>

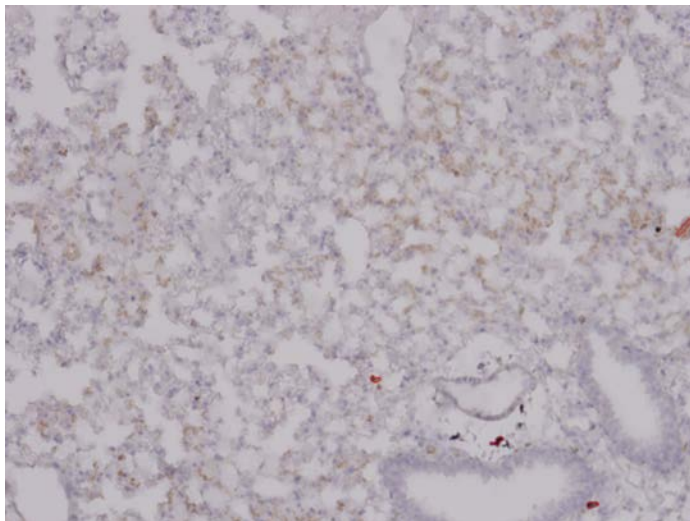

4 CD4<sup>+</sup> cells

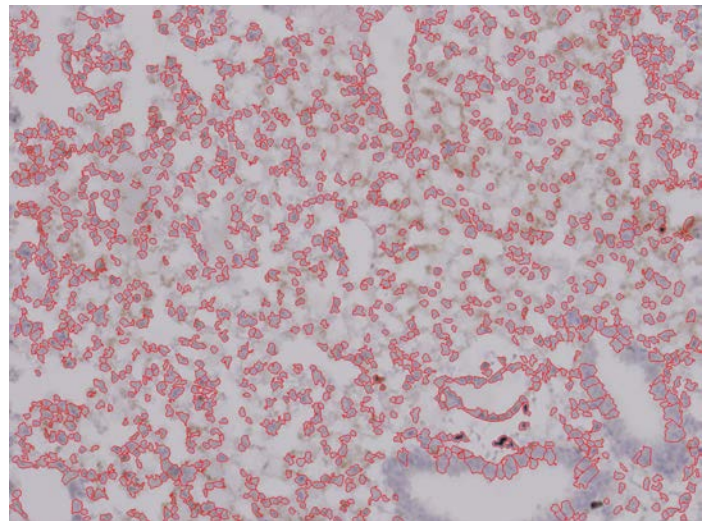

1299 nucleated cells

PBS Lung 1-2  
Unchallenged, Female Cohort

CD8<sup>+</sup>/CD4<sup>+</sup> Cell Annotations

Nucleated Cell Annotations

CD8<sup>+</sup>

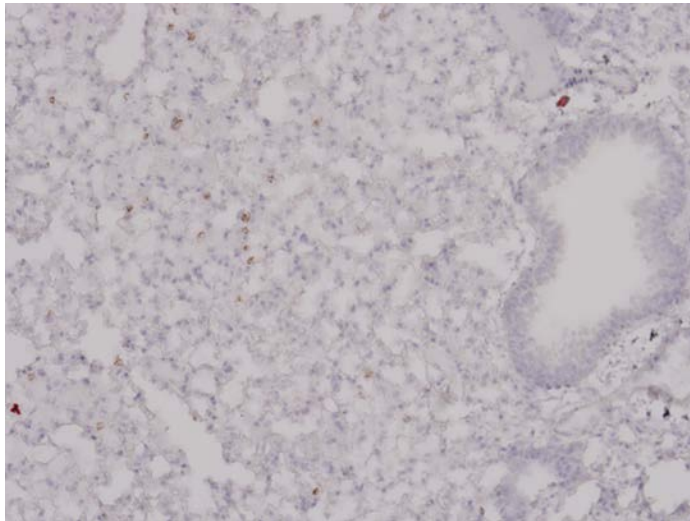

2 CD8<sup>+</sup> cells

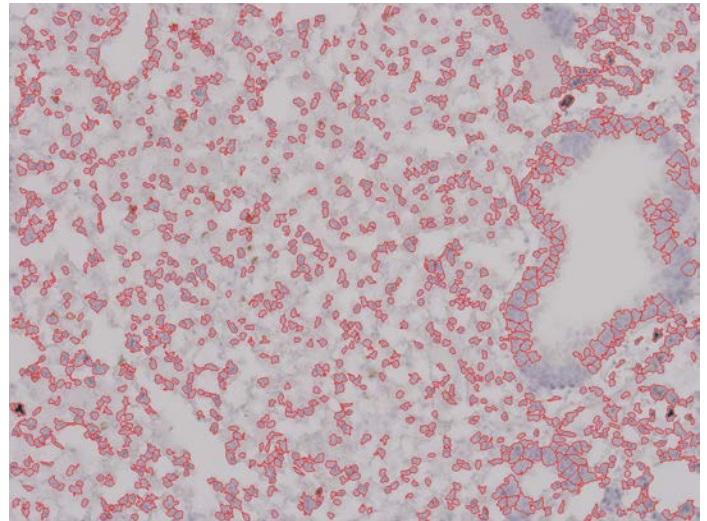

1190 nucleated cells

CD4<sup>+</sup>

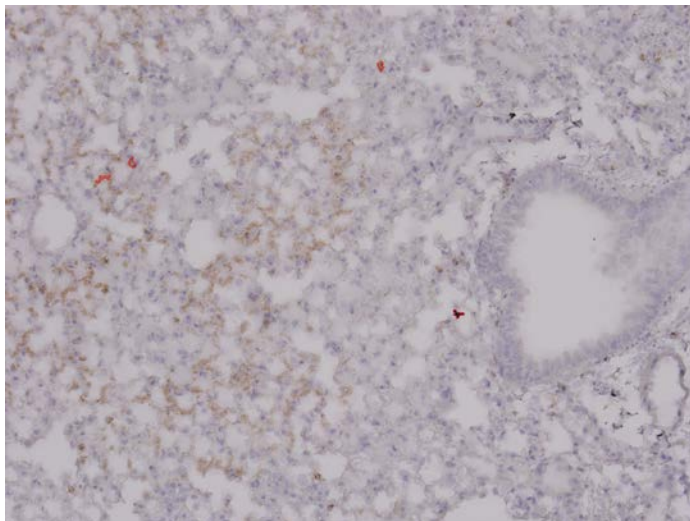

4 CD4<sup>+</sup> cells

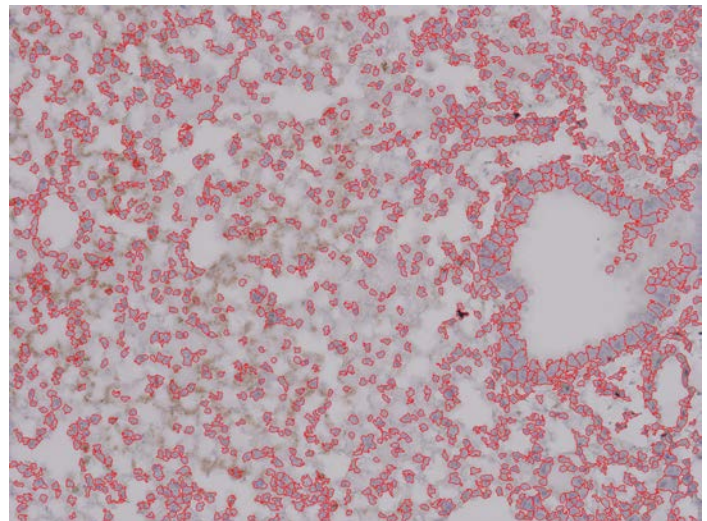

1497 nucleated cells

Supplementary Figure 11  
Page 23/30

PBS Lung 2-1  
Unchallenged, Female Cohort

CD8<sup>+</sup>/CD4<sup>+</sup> Cell Annotations

Nucleated Cell Annotations

CD8<sup>+</sup>

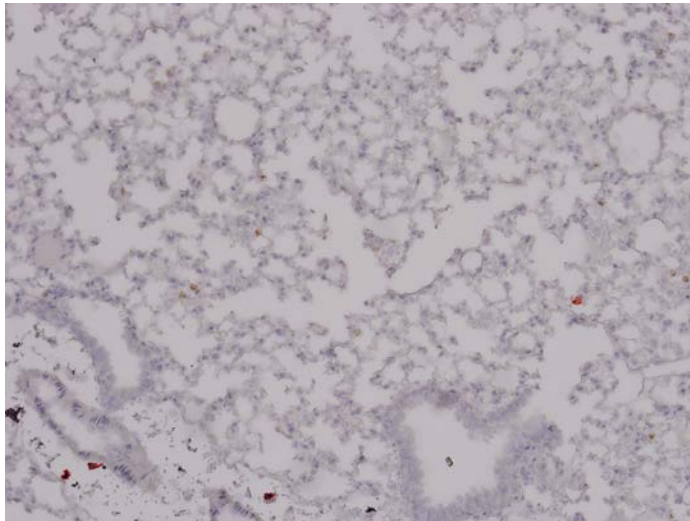

4 CD8<sup>+</sup> cells

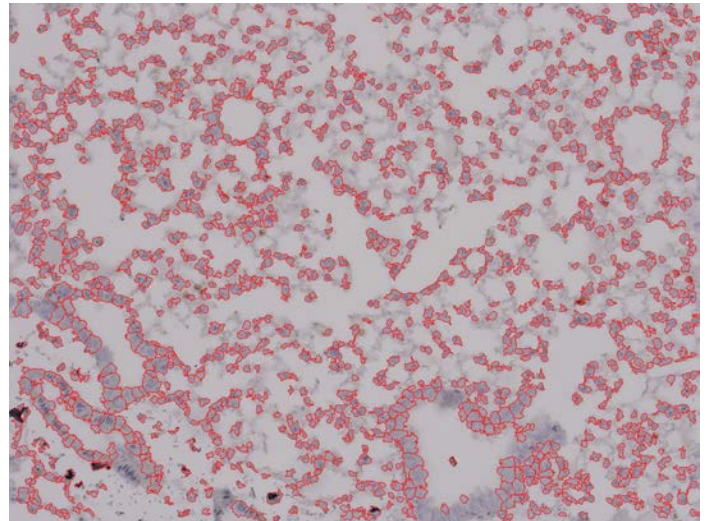

1307 nucleated cells

CD4<sup>+</sup>

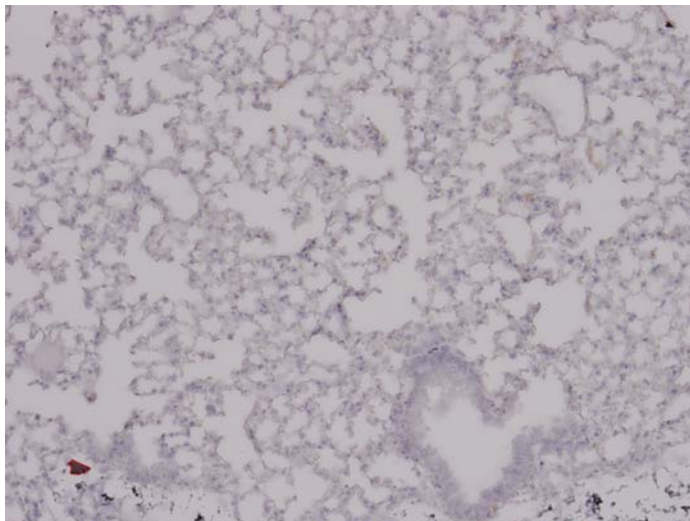

1 CD4<sup>+</sup> cells

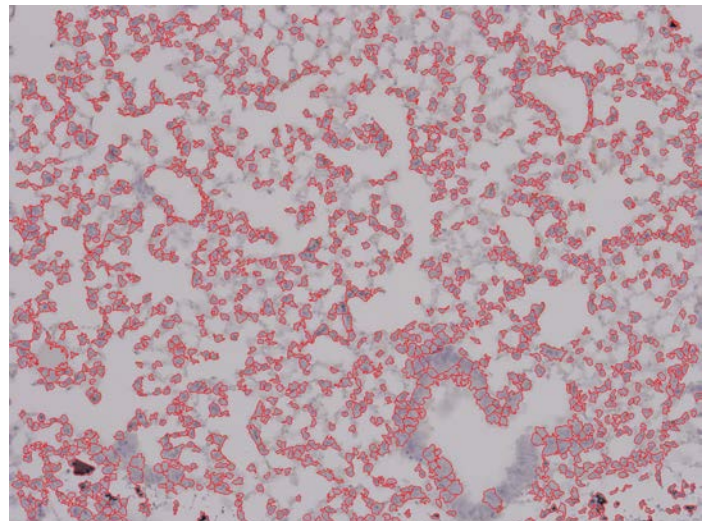

1452 nucleated cells

PBS Lung 2-2  
Unchallenged, Female Cohort

CD8<sup>+</sup>/CD4<sup>+</sup> Cell Annotations

Nucleated Cell Annotations

CD8<sup>+</sup>

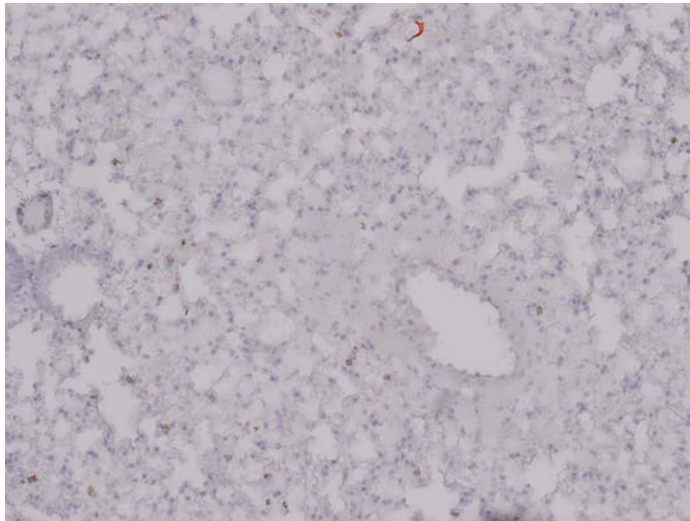

1 CD8<sup>+</sup> cells

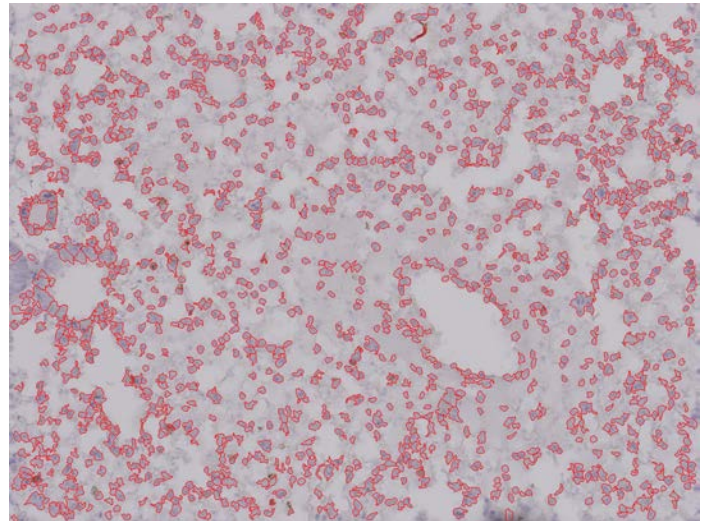

1316 nucleated cells

CD4<sup>+</sup>

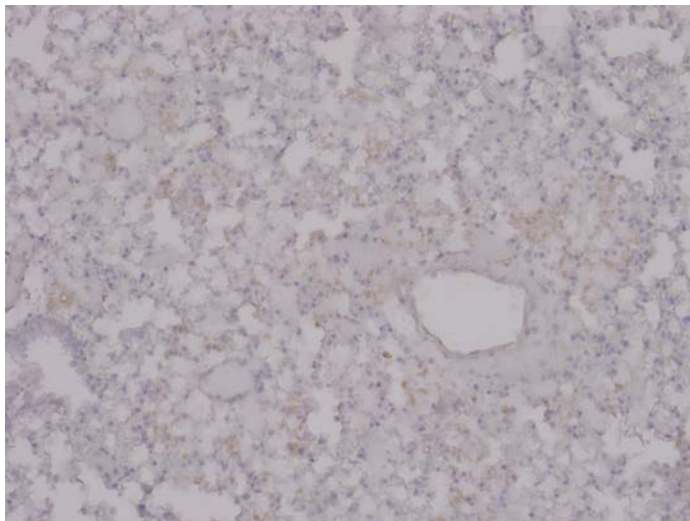

0 CD4<sup>+</sup> cells

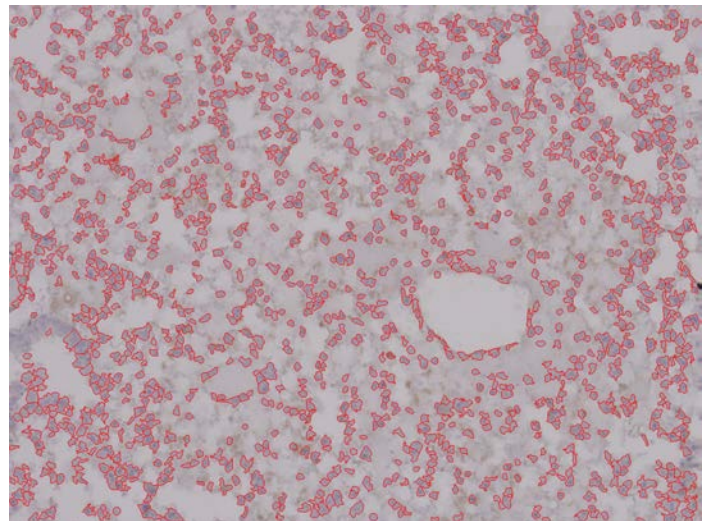

1304 nucleated cells



PBS Lung 2-3  
Unchallenged, Female Cohort

CD8<sup>+</sup>/CD4<sup>+</sup> Cell Annotations

Nucleated Cell Annotations

CD8<sup>+</sup>

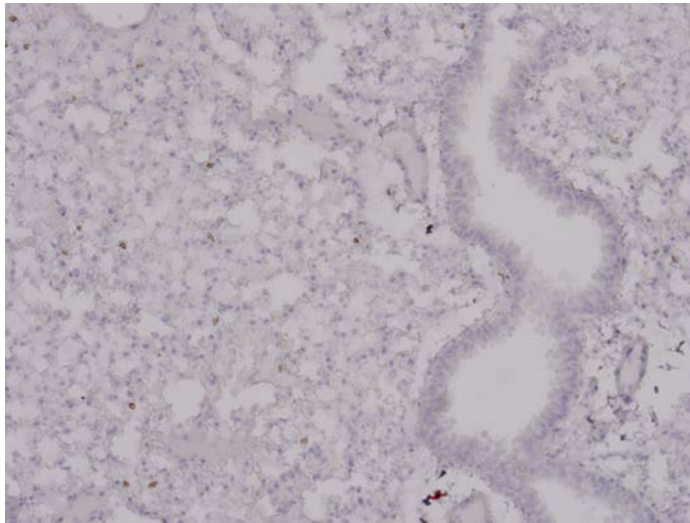

1 CD8<sup>+</sup> cells

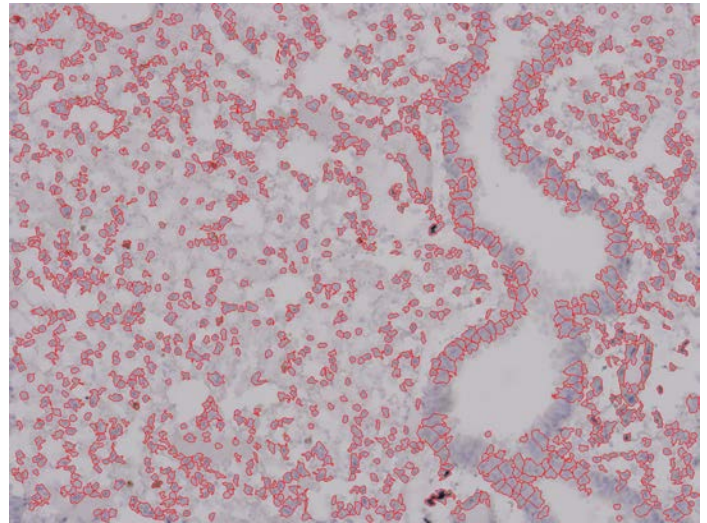

1275 nucleated cells

CD4<sup>+</sup>

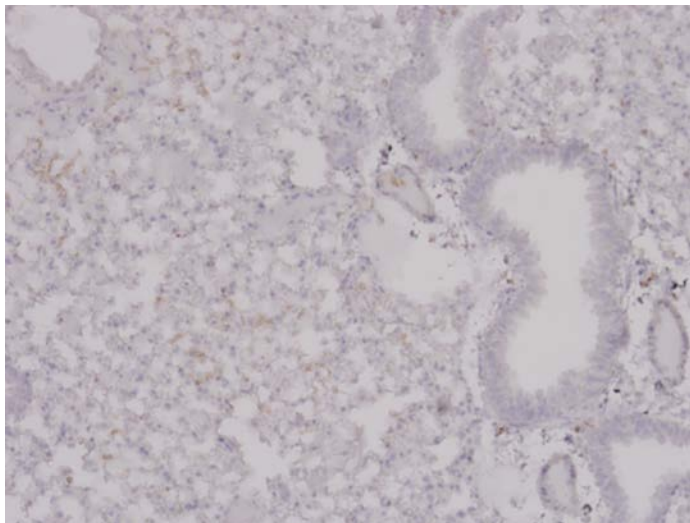

0 CD4<sup>+</sup> cells

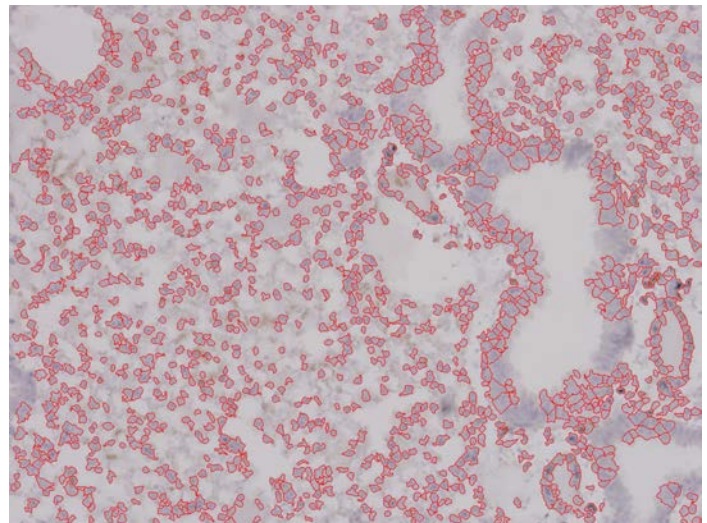

1337 nucleated cells

PBS Lung 2-4  
Unchallenged, Female Cohort

CD8<sup>+</sup>/CD4<sup>+</sup> Cell Annotations

Nucleated Cell Annotations

CD8<sup>+</sup>

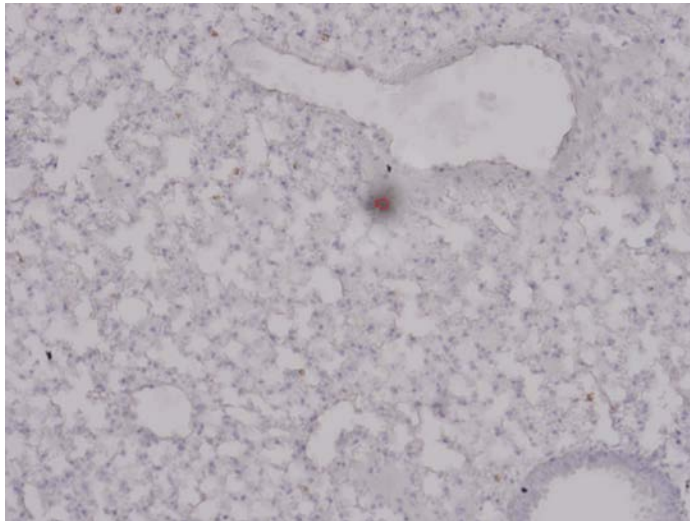

1 CD8<sup>+</sup> cells

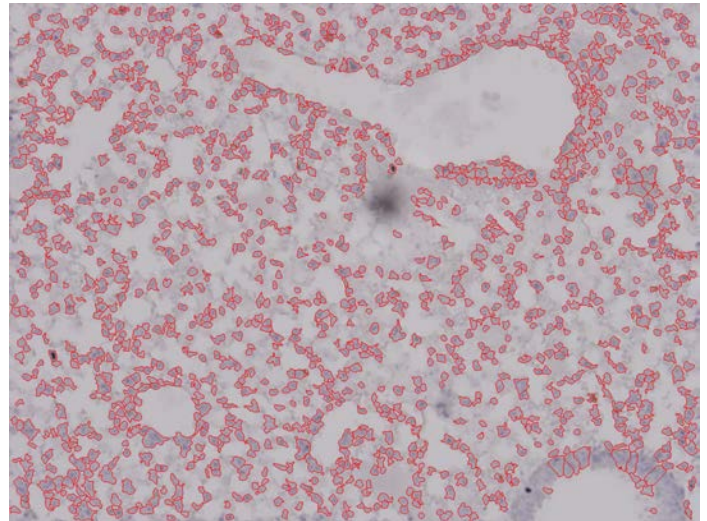

1308 nucleated cells

CD4<sup>+</sup>

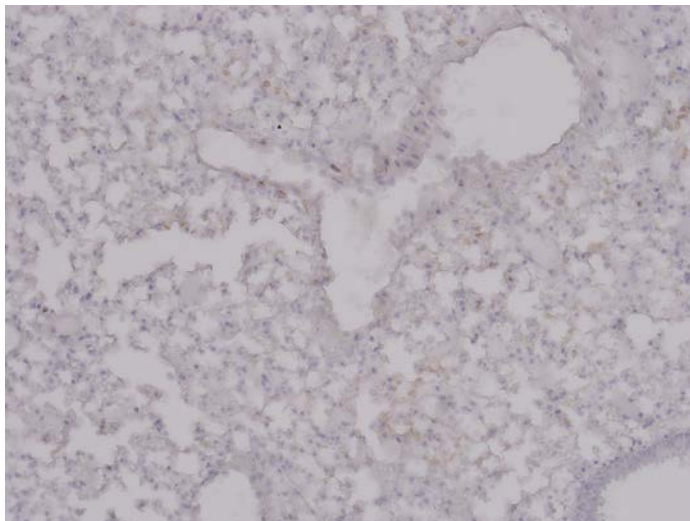

0 CD4<sup>+</sup> cells

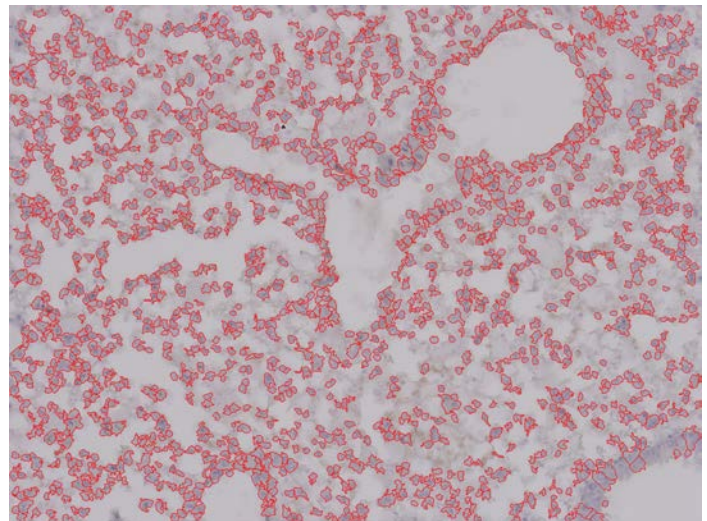

1427 nucleated cells

PBS Lung 3-1  
Unchallenged, Female Cohort

CD8<sup>+</sup>/CD4<sup>+</sup> Cell Annotations

Nucleated Cell Annotations

CD8<sup>+</sup>

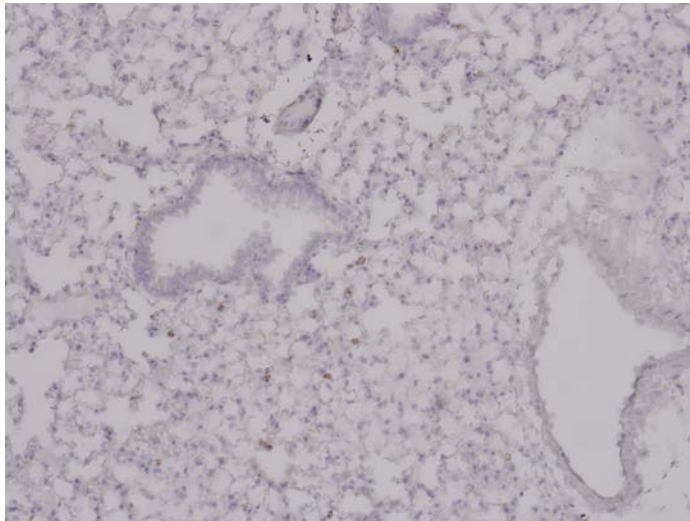

0 CD8<sup>+</sup> cells

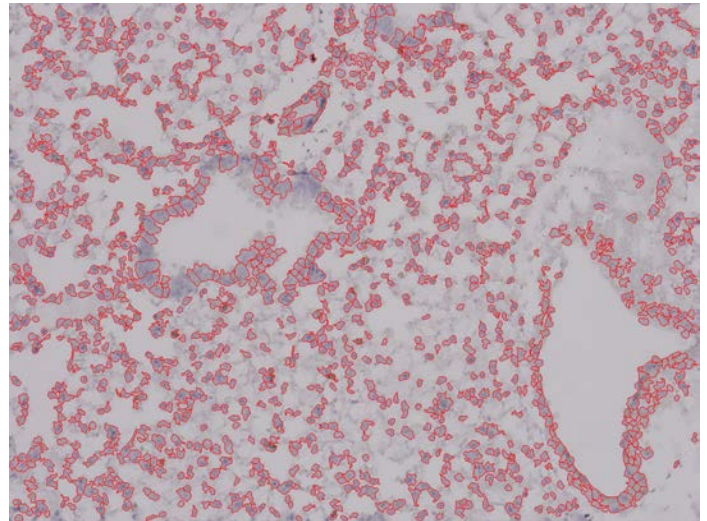

1322 nucleated cells

CD4<sup>+</sup>

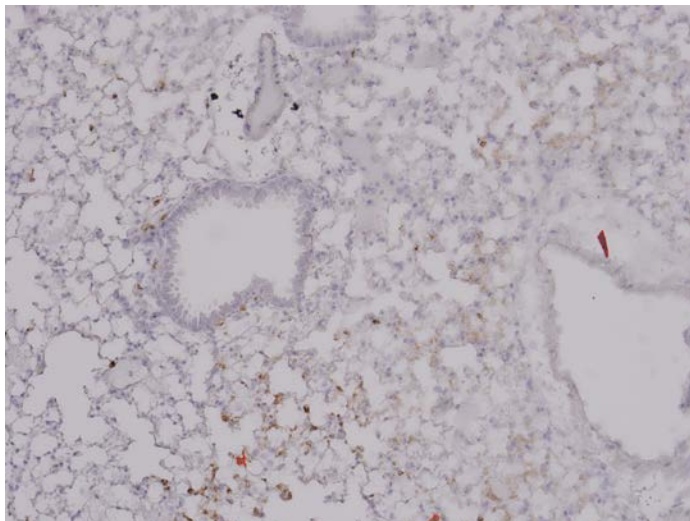

3 CD4<sup>+</sup> cells

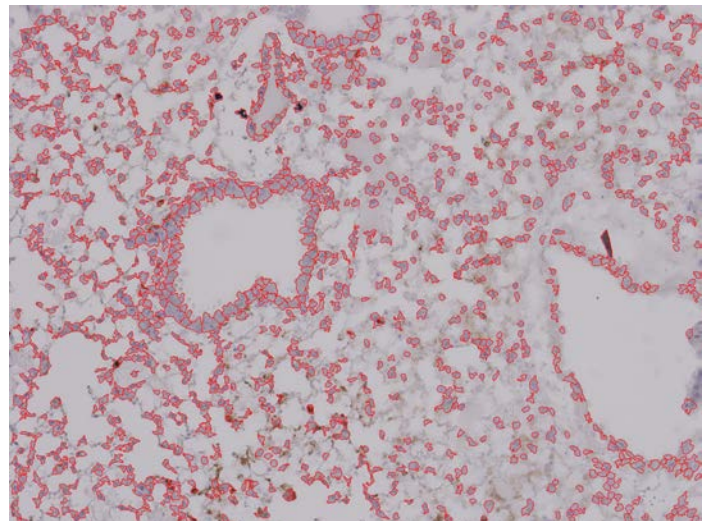

1207 nucleated cells

Supplementary Figure 11  
Page 28/30

PBS Lung 3-2  
Unchallenged, Female Cohort

CD8<sup>+</sup>/CD4<sup>+</sup> Cell Annotations

Nucleated Cell Annotations

CD8<sup>+</sup>

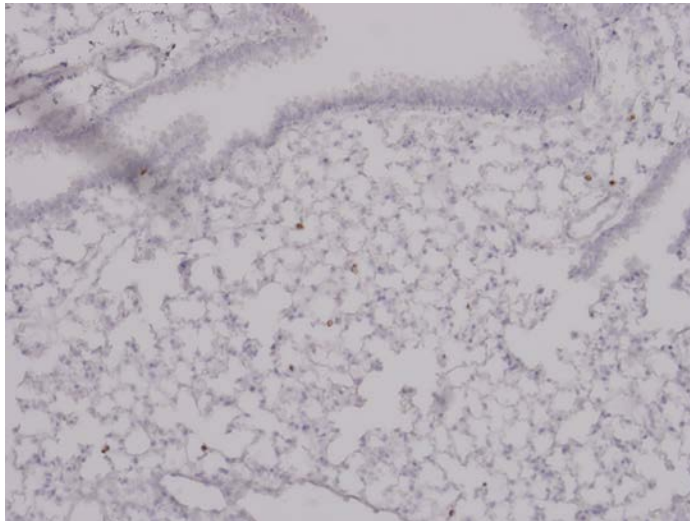

0 CD8<sup>+</sup> cells

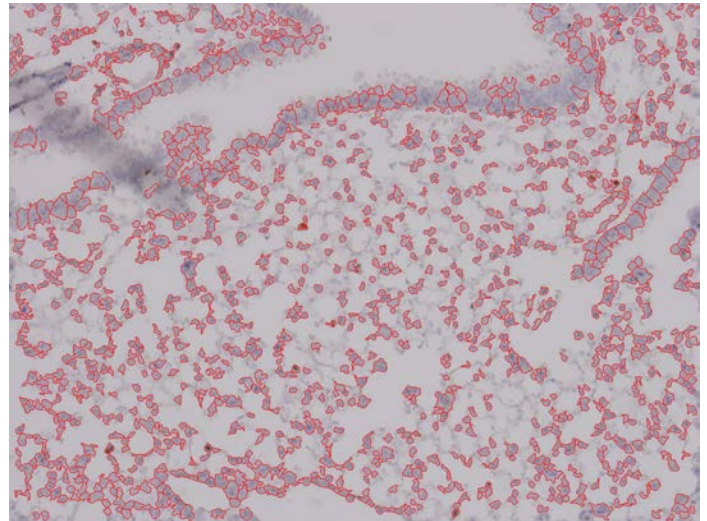

1154 nucleated cells

CD4<sup>+</sup>

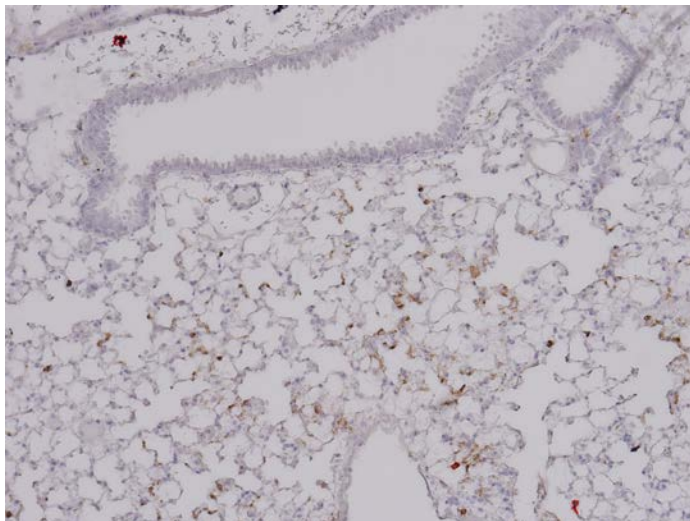

3 CD4<sup>+</sup> cells

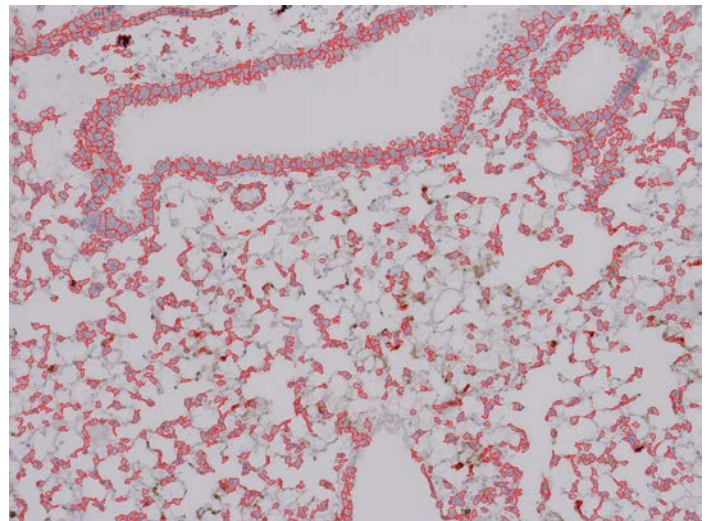

1208 nucleated cells

PBS Lung 3-3  
Unchallenged, Female Cohort

CD8<sup>+</sup>/CD4<sup>+</sup> Cell Annotations

Nucleated Cell Annotations

CD8<sup>+</sup>

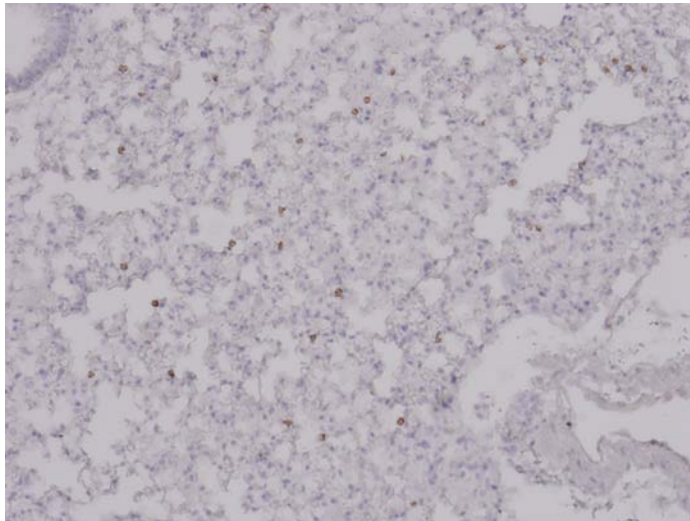

0 CD8<sup>+</sup> cells

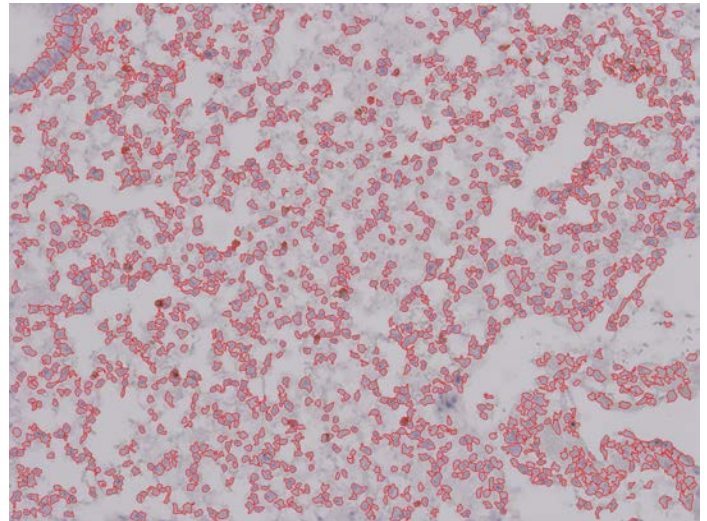

1509 nucleated cells

CD4<sup>+</sup>

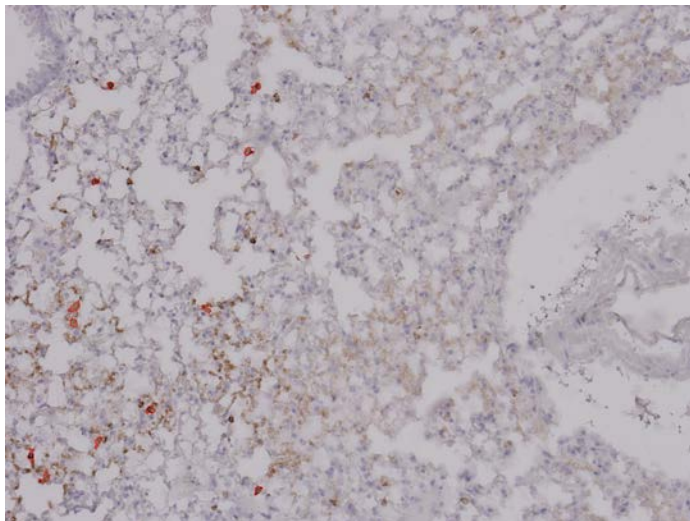

12 CD4<sup>+</sup> cells

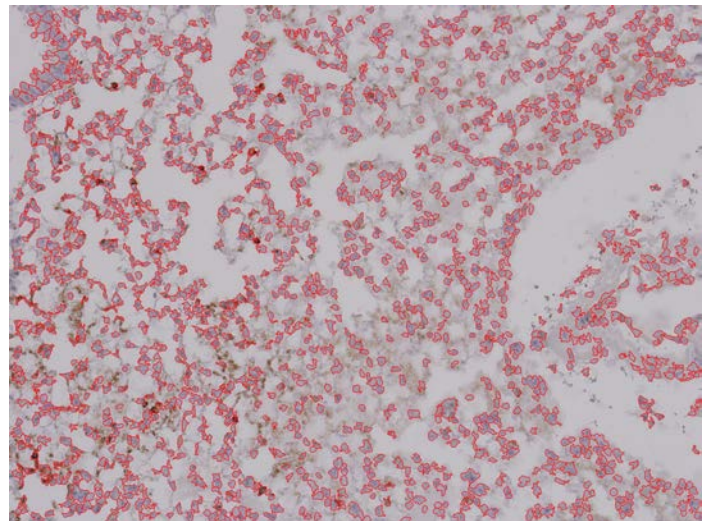

1402 nucleated cells

Supplementary Figure 11  
Page 30/30

PBS Lung 3-4  
Unchallenged, Female Cohort

CD8<sup>+</sup>/CD4<sup>+</sup> Cell Annotations

Nucleated Cell Annotations

CD8<sup>+</sup>

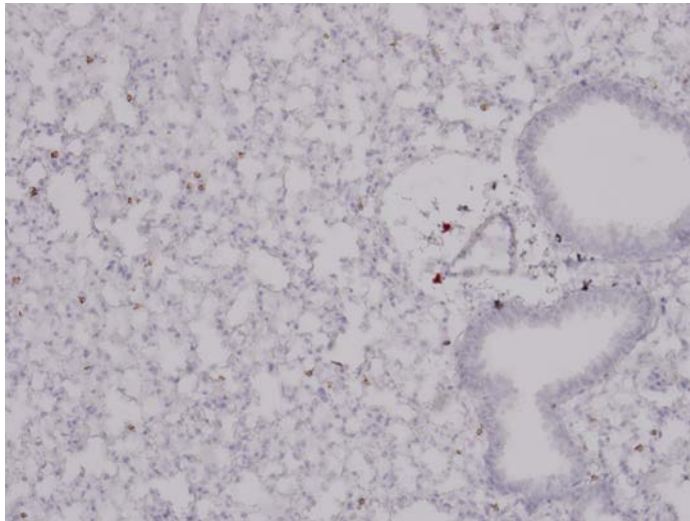

2 CD8<sup>+</sup> cells

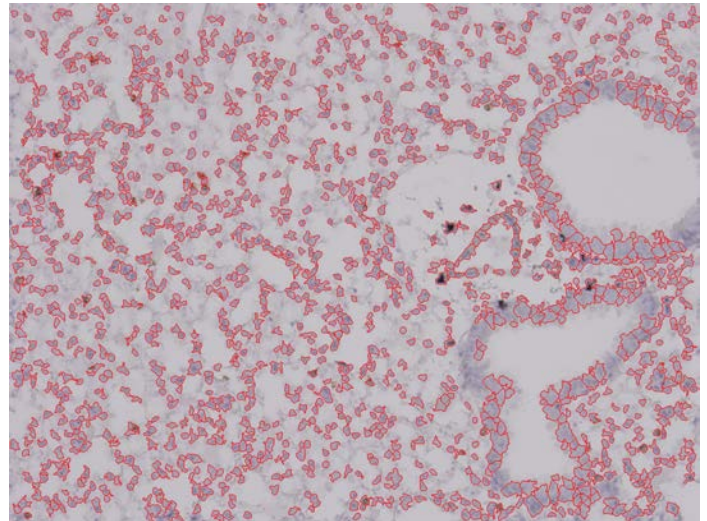

1349 nucleated cells

CD4<sup>+</sup>

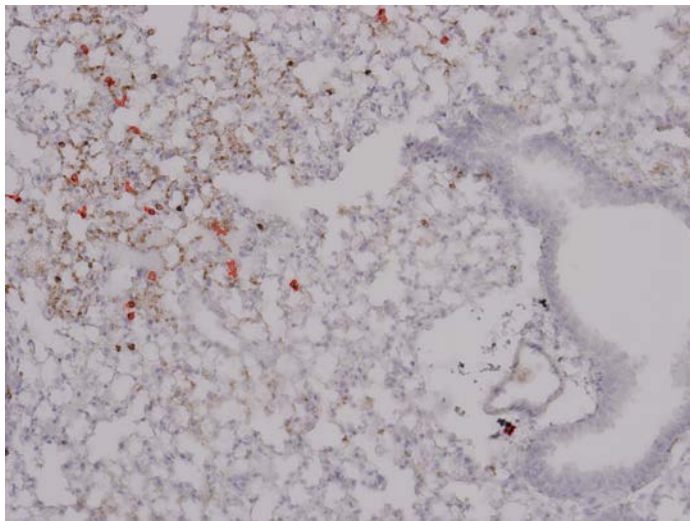

18 CD4<sup>+</sup> cells

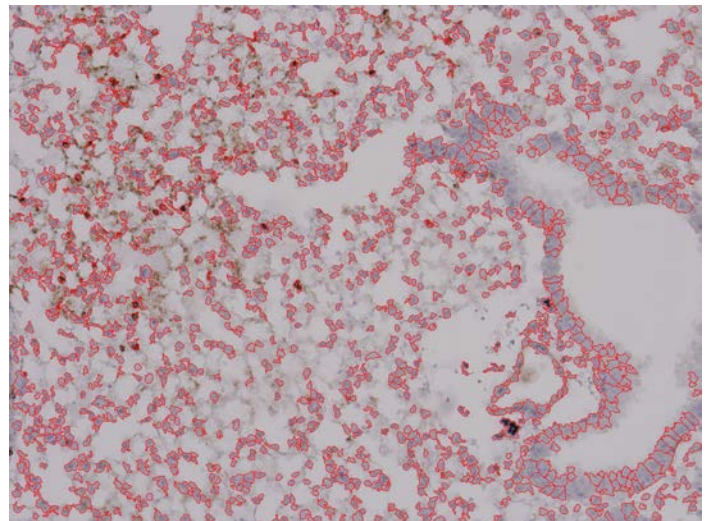

1316 nucleated cells
